# Supplementary material for: Gene-Expression Profiling for Rejection Surveillance after Cardiac Transplantation
Source: Atypon-hosted journal article supplement (doi:10.1056/nejmoa0912965), 2010-04-22
Supplement: nejmoa0912965_disclosures.pdf [file nejmoa0912965_disclosures.pdf]

## ICMJE Uniform Disclosure Form for Potential Conflicts of Interest

### INSTRUCTIONS:

The purpose of this form is to provide readers of your manuscript with information about your other interests that could influence how they receive and understand your work. The form has five parts.

#### 1. Identifying information.

Each author should submit a separate form. Provide complete information and double-check the manuscript number. If you are NOT the corresponding author please insert his or her name.

#### 2. The work under consideration for publication.

Please provide information about the work that you have submitted for publication. The time frame for this reporting is that of the work itself, from the initial conception and planning to the present. The idea is to provide for the reader information about resources that you received, either directly or indirectly (via your institution), to enable you to complete the work. If you check the "No" box it means that you did the work without receiving any financial support from any third party -- that is, the work was supported by funds from the same institution that pays your salary and that institution did not receive third-party funds to pay you. If you or your institution did receive funds from a third party to support the work, check "Yes" along with the appropriate boxes to indicate the type of support and whether you or your institution received it.

#### 3. Relevant financial activities outside the submitted work.

Please report all sources of revenue relevant to the submitted work that accrued either directly to you or were paid to your institution on your behalf over the 36 months prior to submission of the work. This should include all monies from sources with relevance to the submitted work, not just monies from the entity that sponsored the research. If there is any question, it is usually better to disclose a relationship than not to do so. Please note that your interactions with the work's sponsor outside the submitted work should be listed here. For each category list each entity on a separate line. Use as many lines as necessary to provide complete information. In addition, please disclose relationships that fall outside the 36-month window that readers may want to know about and could reasonably criticize you for not disclosing (for example, long-term financial relationships that are now ended).

The goal of this section is to provide information for our reviewers and readers about your interactions with entities in the biomedical arena that could be perceived to influence, or that give the appearance of potentially influencing, what you wrote in the submitted work. You should disclose interactions with ANY entity that could be considered broadly relevant to the work. For example, if your article is about testing an epidermal growth factor receptor (EGFR) antagonist in lung cancer, you should report all associations with entities pursuing diagnostic or therapeutic strategies in cancer in general, not just in the area of EGFR or lung cancer. For grants you have received for work outside the submitted work, you should disclose support ONLY from entities that could be perceived to benefit financially from the published work, such as drug companies, or foundations supported by entities that could be perceived to have a financial stake in the outcome. Public funding sources, such as the NIH or the MRC, need not be disclosed. For example, if the NIH sponsored a piece of work you have been involved in but drugs were provided by a pharmaceutical company, you need only list the pharmaceutical company.

#### 4. Financial relationships involving your spouse or partner or your children (under 18 years of age).

If monies from the types of relationships listed in Section 3 were paid to your spouse or partner or dependent children, please list the type of activity and source of the money.

#### 5. Nonfinancial associations.

Please report any personal, professional, political, institutional, religious, or other associations that a reasonable reader would want to know about in relation to the submitted work.

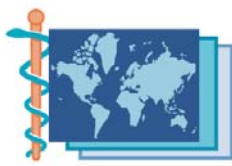

## ICMJE Uniform Disclosure Form for Potential Conflicts of Interest

### Section 1. Identifying Information.

Given Name:  Surname:  Effective Date:

Format example: 07-August-2008

Are you the corresponding author?  Yes  No

Corresponding author's name:

Manuscript Title:

Manuscript Identifying Number (if you know it):

### Section 2. Information about the support of the work under consideration for publication.

Did you or your institution at any time receive payment or support in kind for any aspect of the submitted work (including but not limited to grants, data monitoring board, study design, manuscript preparation, statistical analysis, etc...)?

No

Yes, specify nature of compensation

If you have more than one relationship, click "Add +" to add a row. Click "Del x" to delete an extra row.

| Type                                                      | Money Paid to You*                  |                          | Money to Your Institution           |                                     | Name of Entity    | Comments**                                                                                                                      |       |
|-----------------------------------------------------------|-------------------------------------|--------------------------|-------------------------------------|-------------------------------------|-------------------|---------------------------------------------------------------------------------------------------------------------------------|-------|
|                                                           | No                                  | Yes                      | No                                  | Yes                                 |                   |                                                                                                                                 |       |
| Grant                                                     | <input checked="" type="checkbox"/> | <input type="checkbox"/> | <input type="checkbox"/>            | <input checked="" type="checkbox"/> | XDx               | Payments were made to the University of Chicago for the costs of performing this clinical trial in my institution.              | Del x |
| Grant                                                     | <input checked="" type="checkbox"/> | <input type="checkbox"/> | <input type="checkbox"/>            | <input checked="" type="checkbox"/> | Johnson & Johnson | ASCEND Trial: Payments were made to the University of Chicago for the costs of performing this clinical trial in my institution | Del x |
|                                                           |                                     |                          |                                     |                                     |                   |                                                                                                                                 | Add + |
| Consulting fee or honorarium                              | <input checked="" type="checkbox"/> | <input type="checkbox"/> | <input checked="" type="checkbox"/> | <input type="checkbox"/>            |                   |                                                                                                                                 | Del x |
|                                                           |                                     |                          |                                     |                                     |                   |                                                                                                                                 | Add + |
| Support for travel to meetings for the study or otherwise | <input checked="" type="checkbox"/> | <input type="checkbox"/> | <input checked="" type="checkbox"/> | <input type="checkbox"/>            |                   |                                                                                                                                 | Del x |
|                                                           |                                     |                          |                                     |                                     |                   |                                                                                                                                 | Add + |



**ICMJE Uniform Disclosure Form for Potential Conflicts of Interest**

| Type                                                                                                                                 | Money Paid to You*                  |                          | Money to Your Institution           |                          | Name of Entity | Comments** |       |
|--------------------------------------------------------------------------------------------------------------------------------------|-------------------------------------|--------------------------|-------------------------------------|--------------------------|----------------|------------|-------|
| Fees for participation in review activities such as data monitoring boards, statistical analysis, end point committees, and the like | <input checked="" type="checkbox"/> | <input type="checkbox"/> | <input checked="" type="checkbox"/> | <input type="checkbox"/> |                |            | Del × |
| Fees for participation in review activities such as data monitoring boards, statistical analysis, end point committees, and the like | <input checked="" type="checkbox"/> | <input type="checkbox"/> | <input checked="" type="checkbox"/> | <input type="checkbox"/> |                |            | Del × |
|                                                                                                                                      |                                     |                          |                                     |                          |                |            | Add + |
| Payment for writing or reviewing the manuscript                                                                                      | <input checked="" type="checkbox"/> | <input type="checkbox"/> | <input checked="" type="checkbox"/> | <input type="checkbox"/> |                |            | Del × |
|                                                                                                                                      |                                     |                          |                                     |                          |                |            | Add + |
| Support in kind such as writing, provision of medicines or equipment, or administrative support                                      | <input checked="" type="checkbox"/> | <input type="checkbox"/> | <input checked="" type="checkbox"/> | <input type="checkbox"/> |                |            | Del × |
|                                                                                                                                      |                                     |                          |                                     |                          |                |            | Add + |
| Other                                                                                                                                | <input checked="" type="checkbox"/> | <input type="checkbox"/> | <input checked="" type="checkbox"/> | <input type="checkbox"/> |                |            | Del × |
|                                                                                                                                      |                                     |                          |                                     |                          |                |            | Add + |

\*\*Use this section to provide any needed explanation

**Section 3. Information about relevant financial relationships outside the submitted work.**

Place a check in the appropriate boxes in the table to indicate whether you have financial relationships (regardless of amount of compensation) with any entities that have an interest related to the submitted work. Use one line for each entity; add as many lines as you need. Use the comments column to indicate any additional information that you think a reader or editor would want to know about the compensation. Report relationships that were present during the 36 months prior to submission. In addition please disclose relationships that fall outside the 36-month window that readers may want to know about and could reasonably criticize you for not disclosing (for example, long-term financial relationships that are now ended).

If you have more than one relationship, click "Add +" to add a row. Click "Del ×" to delete an extra row.

| Type of Relationship (in alphabetical order) | No                                  | Money Paid to You        | Money to Your institution | Entity | Comments |       |
|----------------------------------------------|-------------------------------------|--------------------------|---------------------------|--------|----------|-------|
| Board membership                             | <input checked="" type="checkbox"/> | <input type="checkbox"/> | <input type="checkbox"/>  |        |          | Del × |



**ICMJE Uniform Disclosure Form for Potential Conflicts of Interest**

| Type of Relationship<br>(in alphabetical order)                                                      | No                                  | Money<br>Paid to<br>You  | Money to<br>Your<br>institution | Entity | Comments |       |
|------------------------------------------------------------------------------------------------------|-------------------------------------|--------------------------|---------------------------------|--------|----------|-------|
|                                                                                                      |                                     |                          |                                 |        |          | Add + |
| Consultancy                                                                                          | <input checked="" type="checkbox"/> | <input type="checkbox"/> | <input type="checkbox"/>        |        |          | Del × |
|                                                                                                      |                                     |                          |                                 |        |          | Add + |
| Employment                                                                                           | <input checked="" type="checkbox"/> | <input type="checkbox"/> | <input type="checkbox"/>        |        |          | Del × |
|                                                                                                      |                                     |                          |                                 |        |          | Add + |
| Expert testimony                                                                                     | <input checked="" type="checkbox"/> | <input type="checkbox"/> | <input type="checkbox"/>        |        |          | Del × |
|                                                                                                      |                                     |                          |                                 |        |          | Add + |
| Gifts                                                                                                | <input checked="" type="checkbox"/> | <input type="checkbox"/> | <input type="checkbox"/>        |        |          | Del × |
|                                                                                                      |                                     |                          |                                 |        |          | Add + |
| Grants/grants pending                                                                                | <input checked="" type="checkbox"/> | <input type="checkbox"/> | <input type="checkbox"/>        |        |          | Del × |
|                                                                                                      |                                     |                          |                                 |        |          | Add + |
| Honoraria                                                                                            | <input checked="" type="checkbox"/> | <input type="checkbox"/> | <input type="checkbox"/>        |        |          | Del × |
|                                                                                                      |                                     |                          |                                 |        |          | Add + |
| Payment for manuscript<br>preparation                                                                | <input checked="" type="checkbox"/> | <input type="checkbox"/> | <input type="checkbox"/>        |        |          | Del × |
|                                                                                                      |                                     |                          |                                 |        |          | Add + |
| Patents (planned, pending or<br>issued)                                                              | <input checked="" type="checkbox"/> | <input type="checkbox"/> | <input type="checkbox"/>        |        |          | Del × |
|                                                                                                      |                                     |                          |                                 |        |          | Add + |
| Royalties                                                                                            | <input checked="" type="checkbox"/> | <input type="checkbox"/> | <input type="checkbox"/>        |        |          | Del × |
|                                                                                                      |                                     |                          |                                 |        |          | Add + |
| Payment for development of<br>educational presentations<br>including service on speakers'<br>bureaus | <input checked="" type="checkbox"/> | <input type="checkbox"/> | <input type="checkbox"/>        |        |          | Del × |
|                                                                                                      |                                     |                          |                                 |        |          | Add + |
| Stock/stock options                                                                                  | <input checked="" type="checkbox"/> | <input type="checkbox"/> | <input type="checkbox"/>        |        |          | Del × |
|                                                                                                      |                                     |                          |                                 |        |          | Add + |
| Travel/accommodations<br>expenses covered or<br>reimbursed                                           | <input checked="" type="checkbox"/> | <input type="checkbox"/> | <input type="checkbox"/>        |        |          | Del × |
|                                                                                                      |                                     |                          |                                 |        |          | Add + |

## ICMJE Uniform Disclosure Form for Potential Conflicts of Interest

| Type of Relationship<br>(in alphabetical order) | No                                  | Money<br>Paid to<br>You  | Money to<br>Your<br>institution | Entity | Comments |       |
|-------------------------------------------------|-------------------------------------|--------------------------|---------------------------------|--------|----------|-------|
| Other (err on the side of full disclosure)      | <input checked="" type="checkbox"/> | <input type="checkbox"/> | <input type="checkbox"/>        |        |          | Del × |
|                                                 |                                     |                          |                                 |        |          | Add + |

### Section 4. Information about financial relationships involving your spouse or partner or your children (under 18 years of age).

Do your children or your spouse or partner have financial relationships with entities that have an interest in the content of the submitted work?

- No other relationships/conditions/circumstances that present potential conflict of interest
- Yes, the following relationships/conditions/circumstances are present (explain below):

### Section 5. Information about relevant nonfinancial associations.

Do you have any relevant nonfinancial associations or interests (personal, professional, political, institutional, religious, or other) that a reasonable reader would want to know about in relation to the submitted work?

- No relevant nonfinancial relationships/conditions/circumstances to report.
- Yes, the following relevant nonfinancial relationships/conditions/circumstances are present (explain below):

At the time of manuscript acceptance, journals will ask authors to confirm and, if necessary, update their disclosure statements. On occasion, journals may ask authors to disclose further information about reported relationships.

Save Form

## **ICMJE Uniform Disclosure Form for Potential Conflicts of Interest**

### **INSTRUCTIONS:**

The purpose of this form is to provide readers of your manuscript with information about your other interests that could influence how they receive and understand your work. The form has five parts.

#### **1. Identifying information.**

Each author should submit a separate form. Provide complete information and double-check the manuscript number. If you are NOT the corresponding author please insert his or her name.

#### **2. The work under consideration for publication.**

Please provide information about the work that you have submitted for publication. The time frame for this reporting is that of the work itself, from the initial conception and planning to the present. The idea is to provide for the reader information about resources that you received, either directly or indirectly (via your institution), to enable you to complete the work. If you check the "No" box it means that you did the work without receiving any financial support from any third party -- that is, the work was supported by funds from the same institution that pays your salary and that institution did not receive third-party funds to pay you. If you or your institution did receive funds from a third party to support the work, check "Yes" along with the appropriate boxes to indicate the type of support and whether you or your institution received it.

#### **3. Relevant financial activities outside the submitted work.**

Please report all sources of revenue relevant to the submitted work that accrued either directly to you or were paid to your institution on your behalf over the 36 months prior to submission of the work. This should include all monies from sources with relevance to the submitted work, not just monies from the entity that sponsored the research. If there is any question, it is usually better to disclose a relationship than not to do so. Please note that your interactions with the work's sponsor outside the submitted work should be listed here. For each category list each entity on a separate line. Use as many lines as necessary to provide complete information. In addition, please disclose relationships that fall outside the 36-month window that readers may want to know about and could reasonably criticize you for not disclosing (for example, long-term financial relationships that are now ended).

The goal of this section is to provide information for our reviewers and readers about your interactions with entities in the biomedical arena that could be perceived to influence, or that give the appearance of potentially influencing, what you wrote in the submitted work. You should disclose interactions with ANY entity that could be considered broadly relevant to the work. For example, if your article is about testing an epidermal growth factor receptor (EGFR) antagonist in lung cancer, you should report all associations with entities pursuing diagnostic or therapeutic strategies in cancer in general, not just in the area of EGFR or lung cancer. For grants you have received for work outside the submitted work, you should disclose support ONLY from entities that could be perceived to benefit financially from the published work, such as drug companies, or foundations supported by entities that could be perceived to have a financial stake in the outcome. Public funding sources, such as the NIH or the MRC, need not be disclosed. For example, if the NIH sponsored a piece of work you have been involved in but drugs were provided by a pharmaceutical company, you need only list the pharmaceutical company.

#### **4. Financial relationships involving your spouse or partner or your children (under 18 years of age).**

If monies from the types of relationships listed in Section 3 were paid to your spouse or partner or dependent children, please list the type of activity and source of the money.

#### **5. Nonfinancial associations.**

Please report any personal, professional, political, institutional, religious, or other associations that a reasonable reader would want to know about in relation to the submitted work.



## ICMJE Uniform Disclosure Form for Potential Conflicts of Interest

### Section 1. Identifying Information.

Given Name:  Surname:  Effective Date:

(or first)

(or last)

Format example: 07-August-2008

Are you the corresponding author?  Yes  No

Corresponding author's name:

Manuscript Title:

Manuscript Identifying Number (if you know it):

### Section 2. Information about the support of the work under consideration for publication.

Did you or your institution at any time receive payment or support in kind for any aspect of the submitted work (including but not limited to grants, data monitoring board, study design, manuscript preparation, statistical analysis, etc...)?

No

Yes, specify nature of compensation

If you have more than one relationship, click "Add +" to add a row. Click "Del x" to delete an extra row.

| Type                                                                                                                                 | Money Paid to You*                  |                                     | Money to Your Institution           |                                     | Name of Entity | Comments**                                           |       |
|--------------------------------------------------------------------------------------------------------------------------------------|-------------------------------------|-------------------------------------|-------------------------------------|-------------------------------------|----------------|------------------------------------------------------|-------|
|                                                                                                                                      | No                                  | Yes                                 | No                                  | Yes                                 |                |                                                      |       |
| Grant                                                                                                                                | <input checked="" type="checkbox"/> | <input type="checkbox"/>            | <input type="checkbox"/>            | <input checked="" type="checkbox"/> | XdX            | IMAGE Trial Patient enrollment                       | Del x |
|                                                                                                                                      |                                     |                                     |                                     |                                     |                |                                                      | Add + |
| Consulting fee or honorarium                                                                                                         | <input checked="" type="checkbox"/> | <input type="checkbox"/>            | <input checked="" type="checkbox"/> | <input type="checkbox"/>            |                |                                                      | Del x |
|                                                                                                                                      |                                     |                                     |                                     |                                     |                |                                                      | Add + |
| Support for travel to meetings for the study or otherwise                                                                            | <input type="checkbox"/>            | <input checked="" type="checkbox"/> | <input checked="" type="checkbox"/> | <input type="checkbox"/>            | XdX            | Steering Committee working meeting (travel expenses) | Del x |
|                                                                                                                                      |                                     |                                     |                                     |                                     |                |                                                      | Add + |
| Fees for participation in review activities such as data monitoring boards, statistical analysis, end point committees, and the like | <input checked="" type="checkbox"/> | <input type="checkbox"/>            | <input checked="" type="checkbox"/> | <input type="checkbox"/>            |                |                                                      | Del x |
|                                                                                                                                      |                                     |                                     |                                     |                                     |                |                                                      | Add + |
| Payment for writing or reviewing the manuscript                                                                                      | <input checked="" type="checkbox"/> | <input type="checkbox"/>            | <input checked="" type="checkbox"/> | <input type="checkbox"/>            |                |                                                      | Del x |



**ICMJE Uniform Disclosure Form for Potential Conflicts of Interest**

| Type                                                                                            | Money Paid to You*                  |                          | Money to Your Institution           |                          | Name of Entity | Comments** |       |
|-------------------------------------------------------------------------------------------------|-------------------------------------|--------------------------|-------------------------------------|--------------------------|----------------|------------|-------|
|                                                                                                 |                                     |                          |                                     |                          |                |            | Add + |
| Support in kind such as writing, provision of medicines or equipment, or administrative support | <input checked="" type="checkbox"/> | <input type="checkbox"/> | <input checked="" type="checkbox"/> | <input type="checkbox"/> |                |            | Del × |
|                                                                                                 |                                     |                          |                                     |                          |                |            | Add + |
| Other                                                                                           | <input checked="" type="checkbox"/> | <input type="checkbox"/> | <input checked="" type="checkbox"/> | <input type="checkbox"/> |                |            | Del × |
|                                                                                                 |                                     |                          |                                     |                          |                |            | Add + |

\*\*Use this section to provide any needed explanation

**Section 3. Information about relevant financial relationships outside the submitted work.**

Place a check in the appropriate boxes in the table to indicate whether you have financial relationships (regardless of amount of compensation) with any entities that have an interest related to the submitted work. Use one line for each entity; add as many lines as you need. Use the comments column to indicate any additional information that you think a reader or editor would want to know about the compensation. Report relationships that were present during the 36 months prior to submission. In addition please disclose relationships that fall outside the 36-month window that readers may want to know about and could reasonably criticize you for not disclosing (for example, long-term financial relationships that are now ended).

If you have more than one relationship, click "Add +" to add a row. Click "Del ×" to delete an extra row.

| Type of Relationship (in alphabetical order) | No                                  | Money Paid to You                   | Money to Your institution | Entity                         | Comments                |       |
|----------------------------------------------|-------------------------------------|-------------------------------------|---------------------------|--------------------------------|-------------------------|-------|
| Board membership                             | <input type="checkbox"/>            | <input checked="" type="checkbox"/> | <input type="checkbox"/>  | Gilead                         | Advisory board          | Del × |
| Board membership                             | <input type="checkbox"/>            | <input checked="" type="checkbox"/> | <input type="checkbox"/>  | Actelion                       | Advisory board          | Del × |
| Board membership                             | <input type="checkbox"/>            | <input checked="" type="checkbox"/> | <input type="checkbox"/>  | Scios                          | Advisory board          | Del × |
| Board membership                             | <input type="checkbox"/>            | <input checked="" type="checkbox"/> | <input type="checkbox"/>  | Medtronic                      | Advisory board          | Del × |
| Board membership                             | <input type="checkbox"/>            | <input checked="" type="checkbox"/> | <input type="checkbox"/>  | LungRx                         | Advisory Board          | Del × |
|                                              |                                     |                                     |                           |                                |                         | Add + |
| Consultancy                                  | <input type="checkbox"/>            | <input checked="" type="checkbox"/> | <input type="checkbox"/>  | ARMGO Pharmaceutical           | Review ECG data         | Del × |
| Consultancy                                  | <input type="checkbox"/>            | <input checked="" type="checkbox"/> | <input type="checkbox"/>  | Cardiology Research Foundation | ECG Core Lab consultant | Del × |
|                                              |                                     |                                     |                           |                                |                         | Add + |
| Employment                                   | <input checked="" type="checkbox"/> | <input type="checkbox"/>            | <input type="checkbox"/>  |                                |                         | Del × |



**ICMJE Uniform Disclosure Form for Potential Conflicts of Interest**

| Type of Relationship<br>(in alphabetical order) | No                                  | Money<br>Paid to<br>You             | Money to<br>Your<br>institution     | Entity            | Comments                                       |       |
|-------------------------------------------------|-------------------------------------|-------------------------------------|-------------------------------------|-------------------|------------------------------------------------|-------|
|                                                 |                                     |                                     |                                     |                   |                                                | Add + |
| Expert testimony                                | <input checked="" type="checkbox"/> | <input type="checkbox"/>            | <input type="checkbox"/>            |                   |                                                | Del × |
|                                                 |                                     |                                     |                                     |                   |                                                | Add + |
| Gifts                                           | <input checked="" type="checkbox"/> | <input type="checkbox"/>            | <input type="checkbox"/>            |                   |                                                | Del × |
|                                                 |                                     |                                     |                                     |                   |                                                | Add + |
| Grants/grants pending                           | <input type="checkbox"/>            | <input type="checkbox"/>            | <input checked="" type="checkbox"/> | Astellas          | Support for Grand Rounds                       | Del × |
| Grants/grants pending                           | <input type="checkbox"/>            | <input type="checkbox"/>            | <input checked="" type="checkbox"/> | Astellas          | Grant to support TICTAC trial<br>IVUS analysis | Del × |
| Grants/grants pending                           | <input type="checkbox"/>            | <input type="checkbox"/>            | <input checked="" type="checkbox"/> | Gilead`           | ARIES-3 Trial                                  | Del × |
| Grants/grants pending                           | <input type="checkbox"/>            | <input type="checkbox"/>            | <input checked="" type="checkbox"/> | Scios /DCRI       | ASCEND-HF trial                                | Del × |
| Grants/grants pending                           | <input type="checkbox"/>            | <input type="checkbox"/>            | <input checked="" type="checkbox"/> | NHLBI             | CTOT-5 trial                                   | Del × |
| Grants/grants pending                           | <input type="checkbox"/>            | <input type="checkbox"/>            | <input checked="" type="checkbox"/> | XdX`              | IMAGE Trial                                    | Del × |
| Grants/grants pending                           | <input type="checkbox"/>            | <input type="checkbox"/>            | <input checked="" type="checkbox"/> | Cotherix          | Investigator-initiated trial<br>(iloprost)     | Del × |
| Grants/grants pending                           | <input type="checkbox"/>            | <input type="checkbox"/>            | <input checked="" type="checkbox"/> | Impulse Dynamics  | FIX-HF 5 trial (implantable<br>device)         | Del × |
|                                                 |                                     |                                     |                                     |                   |                                                | Add + |
| Honoraria                                       | <input type="checkbox"/>            | <input checked="" type="checkbox"/> | <input type="checkbox"/>            | Glaxo Smith Kline | Speaker fee, Promotional talk                  | Del × |
| Honoraria                                       | <input type="checkbox"/>            | <input checked="" type="checkbox"/> | <input type="checkbox"/>            | Scios             | Speaker fee, Promotional talk                  | Del × |
| Honoraria                                       | <input type="checkbox"/>            | <input checked="" type="checkbox"/> | <input type="checkbox"/>            | Gilead            | Speaker fee, Promotional talk                  | Del × |
| Honoraria                                       | <input type="checkbox"/>            | <input checked="" type="checkbox"/> | <input type="checkbox"/>            | Medtronic         | Speaker fee, Promotional talk                  | Del × |
| Honoraria                                       | <input type="checkbox"/>            | <input checked="" type="checkbox"/> | <input type="checkbox"/>            | Astellas          | Speaker fee, Promotional talk                  | Del × |
|                                                 |                                     |                                     |                                     |                   |                                                | Add + |
| Payment for manuscript<br>preparation           | <input checked="" type="checkbox"/> | <input type="checkbox"/>            | <input type="checkbox"/>            |                   |                                                | Del × |
|                                                 |                                     |                                     |                                     |                   |                                                | Add + |
| Patents (planned, pending or<br>issued)         | <input checked="" type="checkbox"/> | <input type="checkbox"/>            | <input type="checkbox"/>            |                   |                                                | Del × |
|                                                 |                                     |                                     |                                     |                   |                                                | Add + |
| Royalties                                       | <input checked="" type="checkbox"/> | <input type="checkbox"/>            | <input type="checkbox"/>            |                   |                                                | Del × |
|                                                 |                                     |                                     |                                     |                   |                                                | Add + |



**ICMJE Uniform Disclosure Form for Potential Conflicts of Interest**

| Type of Relationship (in alphabetical order)                                                | No                                  | Money Paid to You                   | Money to Your institution | Entity       | Comments                        |       |
|---------------------------------------------------------------------------------------------|-------------------------------------|-------------------------------------|---------------------------|--------------|---------------------------------|-------|
| Payment for development of educational presentations including service on speakers' bureaus | <input checked="" type="checkbox"/> | <input type="checkbox"/>            | <input type="checkbox"/>  |              |                                 | Del × |
|                                                                                             |                                     |                                     |                           |              |                                 | Add + |
| Stock/stock options                                                                         | <input checked="" type="checkbox"/> | <input type="checkbox"/>            | <input type="checkbox"/>  |              |                                 | Del × |
|                                                                                             |                                     |                                     |                           |              |                                 | Add + |
| Travel/accommodations expenses covered or reimbursed                                        | <input type="checkbox"/>            | <input checked="" type="checkbox"/> | <input type="checkbox"/>  | XdX          | Steering committee meeting      | Del × |
| Travel/accommodations expenses covered or reimbursed                                        | <input type="checkbox"/>            | <input checked="" type="checkbox"/> | <input type="checkbox"/>  | Gilead       | Investigators meeting           | Del × |
| Travel/accommodations expenses covered or reimbursed                                        | <input type="checkbox"/>            | <input checked="" type="checkbox"/> | <input type="checkbox"/>  | Scios / DCRI | ASCEND-HF investigators meeting | Del × |
| Travel/accommodations expenses covered or reimbursed                                        | <input type="checkbox"/>            | <input checked="" type="checkbox"/> | <input type="checkbox"/>  | LungRX       | Advisory board meeting          | Del × |
| Travel/accommodations expenses covered or reimbursed                                        | <input type="checkbox"/>            | <input checked="" type="checkbox"/> | <input type="checkbox"/>  | Actelion     | Advisory board meeting          | Del × |
|                                                                                             |                                     |                                     |                           |              |                                 | Add + |
| Other (err on the side of full disclosure)                                                  | <input checked="" type="checkbox"/> | <input type="checkbox"/>            | <input type="checkbox"/>  |              |                                 | Del × |
|                                                                                             |                                     |                                     |                           |              |                                 | Add + |

**Section 4. Information about financial relationships involving your spouse or partner or your children (under 18 years of age).**

Do your children or your spouse or partner have financial relationships with entities that have an interest in the content of the submitted work?

- No other relationships/conditions/circumstances that present potential conflict of interest
- Yes, the following relationships/conditions/circumstances are present (explain below):

## **ICMJE Uniform Disclosure Form for Potential Conflicts of Interest**

### **INSTRUCTIONS:**

The purpose of this form is to provide readers of your manuscript with information about your other interests that could influence how they receive and understand your work. The form has five parts.

#### **1. Identifying information.**

Each author should submit a separate form. Provide complete information and double-check the manuscript number. If you are NOT the corresponding author please insert his or her name.

#### **2. The work under consideration for publication.**

Please provide information about the work that you have submitted for publication. The time frame for this reporting is that of the work itself, from the initial conception and planning to the present. The idea is to provide for the reader information about resources that you received, either directly or indirectly (via your institution), to enable you to complete the work. If you check the "No" box it means that you did the work without receiving any financial support from any third party -- that is, the work was supported by funds from the same institution that pays your salary and that institution did not receive third-party funds to pay you. If you or your institution did receive funds from a third party to support the work, check "Yes" along with the appropriate boxes to indicate the type of support and whether you or your institution received it.

#### **3. Relevant financial activities outside the submitted work.**

Please report all sources of revenue relevant to the submitted work that accrued either directly to you or were paid to your institution on your behalf over the 36 months prior to submission of the work. This should include all monies from sources with relevance to the submitted work, not just monies from the entity that sponsored the research. If there is any question, it is usually better to disclose a relationship than not to do so. Please note that your interactions with the work's sponsor outside the submitted work should be listed here. For each category list each entity on a separate line. Use as many lines as necessary to provide complete information. In addition, please disclose relationships that fall outside the 36-month window that readers may want to know about and could reasonably criticize you for not disclosing (for example, long-term financial relationships that are now ended).

The goal of this section is to provide information for our reviewers and readers about your interactions with entities in the bio-medical arena that could be perceived to influence, or that give the appearance of potentially influencing, what you wrote in the submitted work. You should disclose interactions with ANY entity that could be considered broadly relevant to the work. For example, if your article is about testing an epidermal growth factor receptor (EGFR) antagonist in lung cancer, you should report all associations with entities pursuing diagnostic or therapeutic strategies in cancer in general, not just in the area of EGFR or lung cancer. For grants you have received for work outside the submitted work, you should disclose support ONLY from entities that could be perceived to benefit financially from the published work, such as drug companies, or foundations supported by entities that could be perceived to have a financial stake in the outcome. Public funding sources, such as the NIH or the MRC, need not be disclosed. For example, if the NIH sponsored a piece of work you have been involved in but drugs were provided by a pharmaceutical company, you need only list the pharmaceutical company.

#### **4. Financial relationships involving your spouse or partner or your children (under 18 years of age).**

If monies from the types of relationships listed in Section 3 were paid to your spouse or partner or dependent children, please list the type of activity and source of the money.

#### **5. Nonfinancial associations.**

Please report any personal, professional, political, institutional, religious, or other associations that a reasonable reader would want to know about in relation to the submitted work.



## ICMJE Uniform Disclosure Form for Potential Conflicts of Interest

### Section 1. Identifying Information.

Given Name:  Surname:  Effective Date:

Format example: 07-August-2008

Are you the corresponding author?  Yes  No

Corresponding author's name:

Manuscript Title:

Manuscript Identifying Number (if you know it):

### Section 2. Information about the support of the work under consideration for publication.

Did you or your institution at any time receive payment or support in kind for any aspect of the submitted work (including but not limited to grants, data monitoring board, study design, manuscript preparation, statistical analysis, etc...)?

No

Yes, specify nature of compensation

If you have more than one relationship, click "Add +" to add a row. Click "Del x" to delete an extra row.

| Type                                                                                                                                 | Money Paid to You*                  |                                     | Money to Your Institution           |                          | Name of Entity | Comments**                                                                                                                                                                                     |       |
|--------------------------------------------------------------------------------------------------------------------------------------|-------------------------------------|-------------------------------------|-------------------------------------|--------------------------|----------------|------------------------------------------------------------------------------------------------------------------------------------------------------------------------------------------------|-------|
|                                                                                                                                      | No                                  | Yes                                 | No                                  | Yes                      |                |                                                                                                                                                                                                |       |
| Grant                                                                                                                                | <input checked="" type="checkbox"/> | <input type="checkbox"/>            | <input checked="" type="checkbox"/> | <input type="checkbox"/> |                |                                                                                                                                                                                                | Del x |
|                                                                                                                                      |                                     |                                     |                                     |                          |                |                                                                                                                                                                                                | Add + |
| Consulting fee or honorarium                                                                                                         | <input type="checkbox"/>            | <input checked="" type="checkbox"/> | <input checked="" type="checkbox"/> | <input type="checkbox"/> | XDx Inc.       | Salary<br>XDx employee until 12/2008                                                                                                                                                           | Del x |
|                                                                                                                                      |                                     |                                     |                                     |                          |                |                                                                                                                                                                                                | Add + |
| Support for travel to meetings for the study or otherwise                                                                            | <input type="checkbox"/>            | <input checked="" type="checkbox"/> | <input checked="" type="checkbox"/> | <input type="checkbox"/> | XDx Inc.       | XDx employee until 12/2008:<br>Coverage of travel expenses for study meetings until 12/2008                                                                                                    | Del x |
|                                                                                                                                      |                                     |                                     |                                     |                          |                |                                                                                                                                                                                                | Add + |
| Fees for participation in review activities such as data monitoring boards, statistical analysis, end point committees, and the like | <input type="checkbox"/>            | <input checked="" type="checkbox"/> | <input checked="" type="checkbox"/> | <input type="checkbox"/> | XDx Inc.       | Salary as XDx employee:<br>Until 12/2008, medical monitor of the IMAGE study. Involved in protocol design and implementation and data preparation for DSMB review and for statistical analysis | Del x |
|                                                                                                                                      |                                     |                                     |                                     |                          |                |                                                                                                                                                                                                | Add + |

## ICMJE Uniform Disclosure Form for Potential Conflicts of Interest

| Type                                                                                            | Money Paid to You*                  |                          | Money to Your Institution           |                          | Name of Entity | Comments** |       |
|-------------------------------------------------------------------------------------------------|-------------------------------------|--------------------------|-------------------------------------|--------------------------|----------------|------------|-------|
| Payment for writing or reviewing the manuscript                                                 | <input checked="" type="checkbox"/> | <input type="checkbox"/> | <input checked="" type="checkbox"/> | <input type="checkbox"/> |                | No         | Del × |
|                                                                                                 |                                     |                          |                                     |                          |                |            | Add + |
| Support in kind such as writing, provision of medicines or equipment, or administrative support | <input checked="" type="checkbox"/> | <input type="checkbox"/> | <input checked="" type="checkbox"/> | <input type="checkbox"/> |                | No         | Del × |
|                                                                                                 |                                     |                          |                                     |                          |                |            | Add + |
| Other                                                                                           | <input checked="" type="checkbox"/> | <input type="checkbox"/> | <input checked="" type="checkbox"/> | <input type="checkbox"/> |                | No         | Del × |
|                                                                                                 |                                     |                          |                                     |                          |                |            | Add + |

\*\*Use this section to provide any needed explanation

### Section 3. Information about relevant financial relationships outside the submitted work.

Place a check in the appropriate boxes in the table to indicate whether you have financial relationships (regardless of amount of compensation) with any entities that have an interest related to the submitted work. Use one line for each entity; add as many lines as you need. Use the comments column to indicate any additional information that you think a reader or editor would want to know about the compensation. Report relationships that were present during the 36 months prior to submission. In addition please disclose relationships that fall outside the 36-month window that readers may want to know about and could reasonably criticize you for not disclosing (for example, long-term financial relationships that are now ended).

If you have more than one relationship, click "Add +" to add a row. Click "Del ×" to delete an extra row.

| Type of Relationship (in alphabetical order) | No                                  | Money Paid to You                   | Money to Your institution | Entity   | Comments                         |       |
|----------------------------------------------|-------------------------------------|-------------------------------------|---------------------------|----------|----------------------------------|-------|
| Board membership                             | <input checked="" type="checkbox"/> | <input type="checkbox"/>            | <input type="checkbox"/>  |          |                                  | Del × |
|                                              |                                     |                                     |                           |          |                                  | Add + |
| Consultancy                                  | <input checked="" type="checkbox"/> | <input type="checkbox"/>            | <input type="checkbox"/>  |          |                                  | Del × |
|                                              |                                     |                                     |                           |          |                                  | Add + |
| Employment                                   | <input type="checkbox"/>            | <input checked="" type="checkbox"/> | <input type="checkbox"/>  | XDx Inc. | Employee from 10/2004 to 12/2008 | Del × |
|                                              |                                     |                                     |                           |          |                                  | Add + |
| Expert testimony                             | <input checked="" type="checkbox"/> | <input type="checkbox"/>            | <input type="checkbox"/>  |          |                                  | Del × |
|                                              |                                     |                                     |                           |          |                                  | Add + |
| Gifts                                        | <input checked="" type="checkbox"/> | <input type="checkbox"/>            | <input type="checkbox"/>  |          |                                  | Del × |



**ICMJE Uniform Disclosure Form for Potential Conflicts of Interest**

| Type of Relationship<br>(in alphabetical order)                                                      | No                                  | Money<br>Paid to<br>You             | Money to<br>Your<br>institution | Entity   | Comments                                                                                                                      |       |
|------------------------------------------------------------------------------------------------------|-------------------------------------|-------------------------------------|---------------------------------|----------|-------------------------------------------------------------------------------------------------------------------------------|-------|
|                                                                                                      |                                     |                                     |                                 |          |                                                                                                                               | Add + |
| Grants/grants pending                                                                                | <input checked="" type="checkbox"/> | <input type="checkbox"/>            | <input type="checkbox"/>        |          |                                                                                                                               | Del × |
|                                                                                                      |                                     |                                     |                                 |          |                                                                                                                               | Add + |
| Honoraria                                                                                            | <input checked="" type="checkbox"/> | <input type="checkbox"/>            | <input type="checkbox"/>        |          |                                                                                                                               | Del × |
|                                                                                                      |                                     |                                     |                                 |          |                                                                                                                               | Add + |
| Payment for manuscript<br>preparation                                                                | <input checked="" type="checkbox"/> | <input type="checkbox"/>            | <input type="checkbox"/>        |          |                                                                                                                               | Del × |
|                                                                                                      |                                     |                                     |                                 |          |                                                                                                                               | Add + |
| Patents (planned, pending or<br>issued)                                                              | <input checked="" type="checkbox"/> | <input type="checkbox"/>            | <input type="checkbox"/>        |          |                                                                                                                               | Del × |
|                                                                                                      |                                     |                                     |                                 |          |                                                                                                                               | Add + |
| Royalties                                                                                            | <input checked="" type="checkbox"/> | <input type="checkbox"/>            | <input type="checkbox"/>        |          |                                                                                                                               | Del × |
|                                                                                                      |                                     |                                     |                                 |          |                                                                                                                               | Add + |
| Payment for development of<br>educational presentations<br>including service on speakers'<br>bureaus | <input checked="" type="checkbox"/> | <input type="checkbox"/>            | <input type="checkbox"/>        |          |                                                                                                                               | Del × |
|                                                                                                      |                                     |                                     |                                 |          |                                                                                                                               | Add + |
| Stock/stock options                                                                                  | <input type="checkbox"/>            | <input checked="" type="checkbox"/> | <input type="checkbox"/>        | XDx Inc. | Received stock options as<br>part of employee<br>compensation package but<br>options expired after my<br>departure in 12/2008 | Del × |
|                                                                                                      |                                     |                                     |                                 |          |                                                                                                                               | Add + |
| Travel/accommodations<br>expenses covered or<br>reimbursed                                           | <input type="checkbox"/>            | <input checked="" type="checkbox"/> | <input type="checkbox"/>        | XDx Inc. | Coverage of travel expenses<br>to relevant meetings as XDx<br>employee until 12/2008                                          | Del × |
|                                                                                                      |                                     |                                     |                                 |          |                                                                                                                               | Add + |
| Other (err on the side of full<br>disclosure)                                                        | <input checked="" type="checkbox"/> | <input type="checkbox"/>            | <input type="checkbox"/>        |          |                                                                                                                               | Del × |
|                                                                                                      |                                     |                                     |                                 |          |                                                                                                                               | Add + |

## **ICMJE Uniform Disclosure Form for Potential Conflicts of Interest**

### **Section 4. Information about financial relationships involving your spouse or partner or your children (under 18 years of age).**

Do your children or your spouse or partner have financial relationships with entities that have an interest in the content of the submitted work?

- No other relationships/conditions/circumstances that present potential conflict of interest
- Yes, the following relationships/conditions/circumstances are present (explain below):

### **Section 5. Information about relevant nonfinancial associations.**

Do you have any relevant nonfinancial associations or interests (personal, professional, political, institutional, religious, or other) that a reasonable reader would want to know about in relation to the submitted work?

- No relevant nonfinancial relationships/conditions/circumstances to report.
- Yes, the following relevant nonfinancial relationships/conditions/circumstances are present (explain below):

At the time of manuscript acceptance, journals will ask authors to confirm and, if necessary, update their disclosure statements. On occasion, journals may ask authors to disclose further information about reported relationships.

Save Form

## **ICMJE Uniform Disclosure Form for Potential Conflicts of Interest**

### **INSTRUCTIONS:**

The purpose of this form is to provide readers of your manuscript with information about your other interests that could influence how they receive and understand your work. The form has five parts.

#### **1. Identifying information.**

Each author should submit a separate form. Provide complete information and double-check the manuscript number. If you are NOT the corresponding author please insert his or her name.

#### **2. The work under consideration for publication.**

Please provide information about the work that you have submitted for publication. The time frame for this reporting is that of the work itself, from the initial conception and planning to the present. The idea is to provide for the reader information about resources that you received, either directly or indirectly (via your institution), to enable you to complete the work. If you check the "No" box it means that you did the work without receiving any financial support from any third party -- that is, the work was supported by funds from the same institution that pays your salary and that institution did not receive third-party funds to pay you. If you or your institution did receive funds from a third party to support the work, check "Yes" along with the appropriate boxes to indicate the type of support and whether you or your institution received it.

#### **3. Relevant financial activities outside the submitted work.**

Please report all sources of revenue relevant to the submitted work that accrued either directly to you or were paid to your institution on your behalf over the 36 months prior to submission of the work. This should include all monies from sources with relevance to the submitted work, not just monies from the entity that sponsored the research. If there is any question, it is usually better to disclose a relationship than not to do so. Please note that your interactions with the work's sponsor outside the submitted work should be listed here. For each category list each entity on a separate line. Use as many lines as necessary to provide complete information. In addition, please disclose relationships that fall outside the 36-month window that readers may want to know about and could reasonably criticize you for not disclosing (for example, long-term financial relationships that are now ended).

The goal of this section is to provide information for our reviewers and readers about your interactions with entities in the biomedical arena that could be perceived to influence, or that give the appearance of potentially influencing, what you wrote in the submitted work. You should disclose interactions with ANY entity that could be considered broadly relevant to the work. For example, if your article is about testing an epidermal growth factor receptor (EGFR) antagonist in lung cancer, you should report all associations with entities pursuing diagnostic or therapeutic strategies in cancer in general, not just in the area of EGFR or lung cancer. For grants you have received for work outside the submitted work, you should disclose support ONLY from entities that could be perceived to benefit financially from the published work, such as drug companies, or foundations supported by entities that could be perceived to have a financial stake in the outcome. Public funding sources, such as the NIH or the MRC, need not be disclosed. For example, if the NIH sponsored a piece of work you have been involved in but drugs were provided by a pharmaceutical company, you need only list the pharmaceutical company.

#### **4. Financial relationships involving your spouse or partner or your children (under 18 years of age).**

If monies from the types of relationships listed in Section 3 were paid to your spouse or partner or dependent children, please list the type of activity and source of the money.

#### **5. Nonfinancial associations.**

Please report any personal, professional, political, institutional, religious, or other associations that a reasonable reader would want to know about in relation to the submitted work.



## ICMJE Uniform Disclosure Form for Potential Conflicts of Interest

### Section 1. Identifying Information.

Given Name:  Surname:  Effective Date:

Format example: 07-August-2008

Are you the corresponding author?  Yes  No

Corresponding author's name:

Manuscript Title:

Manuscript Identifying Number (if you know it):

### Section 2. Information about the support of the work under consideration for publication.

Did you or your institution at any time receive payment or support in kind for any aspect of the submitted work (including but not limited to grants, data monitoring board, study design, manuscript preparation, statistical analysis, etc...)?

No

Yes, specify nature of compensation

If you have more than one relationship, click "Add +" to add a row. Click "Del x" to delete an extra row.

| Type                                                                                                                                 | Money Paid to You*                  |                          | Money to Your Institution           |                                     | Name of Entity | Comments**                                                             |       |
|--------------------------------------------------------------------------------------------------------------------------------------|-------------------------------------|--------------------------|-------------------------------------|-------------------------------------|----------------|------------------------------------------------------------------------|-------|
|                                                                                                                                      | No                                  | Yes                      | No                                  | Yes                                 |                |                                                                        |       |
| Grant                                                                                                                                | <input checked="" type="checkbox"/> | <input type="checkbox"/> | <input type="checkbox"/>            | <input checked="" type="checkbox"/> | XDx            | Financial support for enrollment and data collection of study patients | Del x |
|                                                                                                                                      |                                     |                          |                                     |                                     |                |                                                                        | Add + |
| Consulting fee or honorarium                                                                                                         | <input checked="" type="checkbox"/> | <input type="checkbox"/> | <input checked="" type="checkbox"/> | <input type="checkbox"/>            |                |                                                                        | Del x |
|                                                                                                                                      |                                     |                          |                                     |                                     |                |                                                                        | Add + |
| Support for travel to meetings for the study or otherwise                                                                            | <input checked="" type="checkbox"/> | <input type="checkbox"/> | <input checked="" type="checkbox"/> | <input type="checkbox"/>            |                |                                                                        | Del x |
|                                                                                                                                      |                                     |                          |                                     |                                     |                |                                                                        | Add + |
| Fees for participation in review activities such as data monitoring boards, statistical analysis, end point committees, and the like | <input checked="" type="checkbox"/> | <input type="checkbox"/> | <input checked="" type="checkbox"/> | <input type="checkbox"/>            |                |                                                                        | Del x |
|                                                                                                                                      |                                     |                          |                                     |                                     |                |                                                                        | Add + |

## ICMJE Uniform Disclosure Form for Potential Conflicts of Interest

| Type                                                                                            | Money Paid to You*                  |                          | Money to Your Institution           |                          | Name of Entity | Comments** |       |
|-------------------------------------------------------------------------------------------------|-------------------------------------|--------------------------|-------------------------------------|--------------------------|----------------|------------|-------|
| Payment for writing or reviewing the manuscript                                                 | <input checked="" type="checkbox"/> | <input type="checkbox"/> | <input checked="" type="checkbox"/> | <input type="checkbox"/> |                |            | Del × |
|                                                                                                 |                                     |                          |                                     |                          |                |            | Add + |
| Support in kind such as writing, provision of medicines or equipment, or administrative support | <input checked="" type="checkbox"/> | <input type="checkbox"/> | <input checked="" type="checkbox"/> | <input type="checkbox"/> |                |            | Del × |
|                                                                                                 |                                     |                          |                                     |                          |                |            | Add + |
| Other                                                                                           | <input checked="" type="checkbox"/> | <input type="checkbox"/> | <input checked="" type="checkbox"/> | <input type="checkbox"/> |                |            | Del × |
|                                                                                                 |                                     |                          |                                     |                          |                |            | Add + |

\*\*Use this section to provide any needed explanation

### Section 3. Information about relevant financial relationships outside the submitted work.

Place a check in the appropriate boxes in the table to indicate whether you have financial relationships (regardless of amount of compensation) with any entities that have an interest related to the submitted work. Use one line for each entity; add as many lines as you need. Use the comments column to indicate any additional information that you think a reader or editor would want to know about the compensation. Report relationships that were present during the 36 months prior to submission. In addition please disclose relationships that fall outside the 36-month window that readers may want to know about and could reasonably criticize you for not disclosing (for example, long-term financial relationships that are now ended).

If you have more than one relationship, click "Add +" to add a row. Click "Del ×" to delete an extra row.

| Type of Relationship (in alphabetical order) | No                                  | Money Paid to You                   | Money to Your institution | Entity | Comments                   |       |
|----------------------------------------------|-------------------------------------|-------------------------------------|---------------------------|--------|----------------------------|-------|
| Board membership                             | <input type="checkbox"/>            | <input checked="" type="checkbox"/> | <input type="checkbox"/>  | XDx    | Advisory Board - 1 Meeting | Del × |
|                                              |                                     |                                     |                           |        |                            | Add + |
| Consultancy                                  | <input checked="" type="checkbox"/> | <input type="checkbox"/>            | <input type="checkbox"/>  |        |                            | Del × |
|                                              |                                     |                                     |                           |        |                            | Add + |
| Employment                                   | <input checked="" type="checkbox"/> | <input type="checkbox"/>            | <input type="checkbox"/>  |        |                            | Del × |
|                                              |                                     |                                     |                           |        |                            | Add + |
| Expert testimony                             | <input checked="" type="checkbox"/> | <input type="checkbox"/>            | <input type="checkbox"/>  |        |                            | Del × |
|                                              |                                     |                                     |                           |        |                            | Add + |
| Gifts                                        | <input checked="" type="checkbox"/> | <input type="checkbox"/>            | <input type="checkbox"/>  |        |                            | Del × |



**ICMJE Uniform Disclosure Form for Potential Conflicts of Interest**

| Type of Relationship<br>(in alphabetical order)                                                      | No                                  | Money<br>Paid to<br>You             | Money to<br>Your<br>institution     | Entity | Comments                                                                   |       |
|------------------------------------------------------------------------------------------------------|-------------------------------------|-------------------------------------|-------------------------------------|--------|----------------------------------------------------------------------------|-------|
|                                                                                                      |                                     |                                     |                                     |        |                                                                            | Add + |
| Grants/grants pending                                                                                | <input checked="" type="checkbox"/> | <input type="checkbox"/>            | <input type="checkbox"/>            |        |                                                                            | Del × |
|                                                                                                      |                                     |                                     |                                     |        |                                                                            | Add + |
| Honoraria                                                                                            | <input checked="" type="checkbox"/> | <input type="checkbox"/>            | <input type="checkbox"/>            |        |                                                                            | Del × |
|                                                                                                      |                                     |                                     |                                     |        |                                                                            | Add + |
| Payment for manuscript<br>preparation                                                                | <input checked="" type="checkbox"/> | <input type="checkbox"/>            | <input type="checkbox"/>            |        |                                                                            | Del × |
|                                                                                                      |                                     |                                     |                                     |        |                                                                            | Add + |
| Patents (planned, pending or<br>issued)                                                              | <input checked="" type="checkbox"/> | <input type="checkbox"/>            | <input type="checkbox"/>            |        |                                                                            | Del × |
|                                                                                                      |                                     |                                     |                                     |        |                                                                            | Add + |
| Royalties                                                                                            | <input checked="" type="checkbox"/> | <input type="checkbox"/>            | <input type="checkbox"/>            |        |                                                                            | Del × |
|                                                                                                      |                                     |                                     |                                     |        |                                                                            | Add + |
| Payment for development of<br>educational presentations<br>including service on speakers'<br>bureaus | <input checked="" type="checkbox"/> | <input type="checkbox"/>            | <input type="checkbox"/>            |        |                                                                            | Del × |
|                                                                                                      |                                     |                                     |                                     |        |                                                                            | Add + |
| Stock/stock options                                                                                  | <input checked="" type="checkbox"/> | <input type="checkbox"/>            | <input type="checkbox"/>            |        |                                                                            | Del × |
|                                                                                                      |                                     |                                     |                                     |        |                                                                            | Add + |
| Travel/accommodations<br>expenses covered or<br>reimbursed                                           | <input type="checkbox"/>            | <input checked="" type="checkbox"/> | <input type="checkbox"/>            | XDx    | Travel to/from Advisory Board<br>Meeting                                   | Del × |
|                                                                                                      |                                     |                                     |                                     |        |                                                                            | Add + |
| Other (err on the side of full<br>disclosure)                                                        | <input type="checkbox"/>            | <input type="checkbox"/>            | <input checked="" type="checkbox"/> | XDx    | Financial support for CME<br>conference put on by Texas<br>Heart Institute | Del × |
|                                                                                                      |                                     |                                     |                                     |        |                                                                            | Add + |

**Section 4. Information about financial relationships involving your spouse or partner or your children (under 18 years of age).**

Do your children or your spouse or partner have financial relationships with entities that have an interest in the content of the submitted work?

- No other relationships/conditions/circumstances that present potential conflict of interest
- Yes, the following relationships/conditions/circumstances are present (explain below):

## **ICMJE Uniform Disclosure Form for Potential Conflicts of Interest**

### **Section 5. Information about relevant nonfinancial associations.**

Do you have any relevant nonfinancial associations or interests (personal, professional, political, institutional, religious, or other) that a reasonable reader would want to know about in relation to the submitted work?

- No relevant nonfinancial relationships/conditions/circumstances to report.
- Yes, the following relevant nonfinancial relationships/conditions/circumstances are present (explain below):

At the time of manuscript acceptance, journals will ask authors to confirm and, if necessary, update their disclosure statements. On occasion, journals may ask authors to disclose further information about reported relationships.

Save Form

## ICMJE Uniform Disclosure Form for Potential Conflicts of Interest

### INSTRUCTIONS:

The purpose of this form is to provide readers of your manuscript with information about your other interests that could influence how they receive and understand your work. The form has five parts.

#### 1. Identifying information.

Each author should submit a separate form. Provide complete information and double-check the manuscript number. If you are NOT the corresponding author please insert his or her name.

#### 2. The work under consideration for publication.

Please provide information about the work that you have submitted for publication. The time frame for this reporting is that of the work itself, from the initial conception and planning to the present. The idea is to provide for the reader information about resources that you received, either directly or indirectly (via your institution), to enable you to complete the work. If you check the "No" box it means that you did the work without receiving any financial support from any third party -- that is, the work was supported by funds from the same institution that pays your salary and that institution did not receive third-party funds to pay you. If you or your institution did receive funds from a third party to support the work, check "Yes" along with the appropriate boxes to indicate the type of support and whether you or your institution received it.

#### 3. Relevant financial activities outside the submitted work.

Please report all sources of revenue relevant to the submitted work that accrued either directly to you or were paid to your institution on your behalf over the 36 months prior to submission of the work. This should include all monies from sources with relevance to the submitted work, not just monies from the entity that sponsored the research. If there is any question, it is usually better to disclose a relationship than not to do so. Please note that your interactions with the work's sponsor outside the submitted work should be listed here. For each category list each entity on a separate line. Use as many lines as necessary to provide complete information. In addition, please disclose relationships that fall outside the 36-month window that readers may want to know about and could reasonably criticize you for not disclosing (for example, long-term financial relationships that are now ended).

The goal of this section is to provide information for our reviewers and readers about your interactions with entities in the biomedical arena that could be perceived to influence, or that give the appearance of potentially influencing, what you wrote in the submitted work. You should disclose interactions with ANY entity that could be considered broadly relevant to the work. For example, if your article is about testing an epidermal growth factor receptor (EGFR) antagonist in lung cancer, you should report all associations with entities pursuing diagnostic or therapeutic strategies in cancer in general, not just in the area of EGFR or lung cancer. For grants you have received for work outside the submitted work, you should disclose support ONLY from entities that could be perceived to benefit financially from the published work, such as drug companies, or foundations supported by entities that could be perceived to have a financial stake in the outcome. Public funding sources, such as the NIH or the MRC, need not be disclosed. For example, if the NIH sponsored a piece of work you have been involved in but drugs were provided by a pharmaceutical company, you need only list the pharmaceutical company.

#### 4. Financial relationships involving your spouse or partner or your children (under 18 years of age).

If monies from the types of relationships listed in Section 3 were paid to your spouse or partner or dependent children, please list the type of activity and source of the money.

#### 5. Nonfinancial associations.

Please report any personal, professional, political, institutional, religious, or other associations that a reasonable reader would want to know about in relation to the submitted work.



## ICMJE Uniform Disclosure Form for Potential Conflicts of Interest

### Section 1. Identifying Information.

Given Name:  Surname:  Effective Date:

Format example: 07-August-2008

Are you the corresponding author?  Yes  No

Corresponding author's name:

Manuscript Title:

Manuscript Identifying Number (if you know it):

### Section 2. Information about the support of the work under consideration for publication.

Did you or your institution at any time receive payment or support in kind for any aspect of the submitted work (including but not limited to grants, data monitoring board, study design, manuscript preparation, statistical analysis, etc...)?

No

Yes, specify nature of compensation

If you have more than one relationship, click "Add +" to add a row. Click "Del x" to delete an extra row.

| Type                                                                                                                                 | Money Paid to You*                  |                          | Money to Your Institution           |                                     | Name of Entity | Comments**                                                                                           |       |
|--------------------------------------------------------------------------------------------------------------------------------------|-------------------------------------|--------------------------|-------------------------------------|-------------------------------------|----------------|------------------------------------------------------------------------------------------------------|-------|
|                                                                                                                                      | No                                  | Yes                      | No                                  | Yes                                 |                |                                                                                                      |       |
| Grant                                                                                                                                | <input checked="" type="checkbox"/> | <input type="checkbox"/> | <input type="checkbox"/>            | <input checked="" type="checkbox"/> | Xdx            | Xdx was the sponsor for the study presented here and paid for personnel to execute the study at Penn | Del x |
|                                                                                                                                      |                                     |                          |                                     |                                     |                |                                                                                                      | Add + |
| Consulting fee or honorarium                                                                                                         | <input checked="" type="checkbox"/> | <input type="checkbox"/> | <input checked="" type="checkbox"/> | <input type="checkbox"/>            |                |                                                                                                      | Del x |
|                                                                                                                                      |                                     |                          |                                     |                                     |                |                                                                                                      | Add + |
| Support for travel to meetings for the study or otherwise                                                                            | <input checked="" type="checkbox"/> | <input type="checkbox"/> | <input checked="" type="checkbox"/> | <input type="checkbox"/>            |                |                                                                                                      | Del x |
|                                                                                                                                      |                                     |                          |                                     |                                     |                |                                                                                                      | Add + |
| Fees for participation in review activities such as data monitoring boards, statistical analysis, end point committees, and the like | <input checked="" type="checkbox"/> | <input type="checkbox"/> | <input checked="" type="checkbox"/> | <input type="checkbox"/>            |                |                                                                                                      | Del x |
|                                                                                                                                      |                                     |                          |                                     |                                     |                |                                                                                                      | Add + |

## ICMJE Uniform Disclosure Form for Potential Conflicts of Interest

| Type                                                                                            | Money Paid to You*                  |                          | Money to Your Institution           |                          | Name of Entity | Comments** |       |
|-------------------------------------------------------------------------------------------------|-------------------------------------|--------------------------|-------------------------------------|--------------------------|----------------|------------|-------|
| Payment for writing or reviewing the manuscript                                                 | <input checked="" type="checkbox"/> | <input type="checkbox"/> | <input checked="" type="checkbox"/> | <input type="checkbox"/> |                |            | Del × |
|                                                                                                 |                                     |                          |                                     |                          |                |            | Add + |
| Support in kind such as writing, provision of medicines or equipment, or administrative support | <input checked="" type="checkbox"/> | <input type="checkbox"/> | <input checked="" type="checkbox"/> | <input type="checkbox"/> |                |            | Del × |
|                                                                                                 |                                     |                          |                                     |                          |                |            | Add + |
| Other                                                                                           | <input checked="" type="checkbox"/> | <input type="checkbox"/> | <input checked="" type="checkbox"/> | <input type="checkbox"/> |                |            | Del × |
|                                                                                                 |                                     |                          |                                     |                          |                |            | Add + |

\*\*Use this section to provide any needed explanation

### Section 3. Information about relevant financial relationships outside the submitted work.

Place a check in the appropriate boxes in the table to indicate whether you have financial relationships (regardless of amount of compensation) with any entities that have an interest related to the submitted work. Use one line for each entity; add as many lines as you need. Use the comments column to indicate any additional information that you think a reader or editor would want to know about the compensation. Report relationships that were present during the 36 months prior to submission. In addition please disclose relationships that fall outside the 36-month window that readers may want to know about and could reasonably criticize you for not disclosing (for example, long-term financial relationships that are now ended).

If you have more than one relationship, click "Add +" to add a row. Click "Del ×" to delete an extra row.

| Type of Relationship (in alphabetical order) | No                                  | Money Paid to You        | Money to Your institution | Entity | Comments |       |       |
|----------------------------------------------|-------------------------------------|--------------------------|---------------------------|--------|----------|-------|-------|
| Board membership                             | <input checked="" type="checkbox"/> | <input type="checkbox"/> | <input type="checkbox"/>  |        |          | Del × |       |
|                                              |                                     |                          |                           |        |          |       | Add + |
| Consultancy                                  | <input checked="" type="checkbox"/> | <input type="checkbox"/> | <input type="checkbox"/>  |        |          | Del × |       |
|                                              |                                     |                          |                           |        |          |       | Add + |
| Employment                                   | <input checked="" type="checkbox"/> | <input type="checkbox"/> | <input type="checkbox"/>  |        |          | Del × |       |
|                                              |                                     |                          |                           |        |          |       | Add + |
| Expert testimony                             | <input checked="" type="checkbox"/> | <input type="checkbox"/> | <input type="checkbox"/>  |        |          | Del × |       |
|                                              |                                     |                          |                           |        |          |       | Add + |
| Gifts                                        | <input checked="" type="checkbox"/> | <input type="checkbox"/> | <input type="checkbox"/>  |        |          | Del × |       |



**ICMJE Uniform Disclosure Form for Potential Conflicts of Interest**

| Type of Relationship<br>(in alphabetical order)                                                      | No                                  | Money<br>Paid to<br>You             | Money to<br>Your<br>institution     | Entity             | Comments        |       |
|------------------------------------------------------------------------------------------------------|-------------------------------------|-------------------------------------|-------------------------------------|--------------------|-----------------|-------|
|                                                                                                      |                                     |                                     |                                     |                    |                 | Add + |
| Grants/grants pending                                                                                | <input type="checkbox"/>            | <input checked="" type="checkbox"/> | <input checked="" type="checkbox"/> | NIH/NHLBI          | Research Grants | Del × |
| Grants/grants pending                                                                                | <input type="checkbox"/>            | <input checked="" type="checkbox"/> | <input checked="" type="checkbox"/> | Abbott Diagnostics | Research Grants | Del × |
| Grants/grants pending                                                                                | <input type="checkbox"/>            | <input checked="" type="checkbox"/> | <input checked="" type="checkbox"/> | GlaxoSmithKline    | Research Grants | Del × |
| Grants/grants pending                                                                                | <input type="checkbox"/>            | <input checked="" type="checkbox"/> | <input checked="" type="checkbox"/> | Celladon           | Research Grants | Del × |
|                                                                                                      |                                     |                                     |                                     |                    |                 | Add + |
| Honoraria                                                                                            | <input checked="" type="checkbox"/> | <input type="checkbox"/>            | <input type="checkbox"/>            |                    |                 | Del × |
|                                                                                                      |                                     |                                     |                                     |                    |                 | Add + |
| Payment for manuscript<br>preparation                                                                | <input checked="" type="checkbox"/> | <input type="checkbox"/>            | <input type="checkbox"/>            |                    |                 | Del × |
|                                                                                                      |                                     |                                     |                                     |                    |                 | Add + |
| Patents (planned, pending or<br>issued)                                                              | <input checked="" type="checkbox"/> | <input type="checkbox"/>            | <input type="checkbox"/>            |                    |                 | Del × |
|                                                                                                      |                                     |                                     |                                     |                    |                 | Add + |
| Royalties                                                                                            | <input checked="" type="checkbox"/> | <input type="checkbox"/>            | <input type="checkbox"/>            |                    |                 | Del × |
|                                                                                                      |                                     |                                     |                                     |                    |                 | Add + |
| Payment for development of<br>educational presentations<br>including service on speakers'<br>bureaus | <input checked="" type="checkbox"/> | <input type="checkbox"/>            | <input type="checkbox"/>            |                    |                 | Del × |
|                                                                                                      |                                     |                                     |                                     |                    |                 | Add + |
| Stock/stock options                                                                                  | <input checked="" type="checkbox"/> | <input type="checkbox"/>            | <input type="checkbox"/>            |                    |                 | Del × |
|                                                                                                      |                                     |                                     |                                     |                    |                 | Add + |
| Travel/accommodations<br>expenses covered or<br>reimbursed                                           | <input checked="" type="checkbox"/> | <input type="checkbox"/>            | <input type="checkbox"/>            |                    |                 | Del × |
|                                                                                                      |                                     |                                     |                                     |                    |                 | Add + |
| Other (err on the side of full<br>disclosure)                                                        | <input checked="" type="checkbox"/> | <input type="checkbox"/>            | <input type="checkbox"/>            |                    |                 | Del × |
|                                                                                                      |                                     |                                     |                                     |                    |                 | Add + |

## **ICMJE Uniform Disclosure Form for Potential Conflicts of Interest**

### **Section 4. Information about financial relationships involving your spouse or partner or your children (under 18 years of age).**

Do your children or your spouse or partner have financial relationships with entities that have an interest in the content of the submitted work?

- No other relationships/conditions/circumstances that present potential conflict of interest
- Yes, the following relationships/conditions/circumstances are present (explain below):

### **Section 5. Information about relevant nonfinancial associations.**

Do you have any relevant nonfinancial associations or interests (personal, professional, political, institutional, religious, or other) that a reasonable reader would want to know about in relation to the submitted work?

- No relevant nonfinancial relationships/conditions/circumstances to report.
- Yes, the following relevant nonfinancial relationships/conditions/circumstances are present (explain below):

I have a patent application pending on use of specific gene expression assays as a method to diagnose and track cardiac allograft rejection. This arose via independent research performed in my laboratory that was completed several years before I became involved in the IMAGE study and is completely independent of XDX and XDX products.

At the time of manuscript acceptance, journals will ask authors to confirm and, if necessary, update their disclosure statements. On occasion, journals may ask authors to disclose further information about reported relationships.

Save Form

## **ICMJE Uniform Disclosure Form for Potential Conflicts of Interest**

### **INSTRUCTIONS:**

The purpose of this form is to provide readers of your manuscript with information about your other interests that could influence how they receive and understand your work. The form has five parts.

#### **1. Identifying information.**

Each author should submit a separate form. Provide complete information and double-check the manuscript number. If you are NOT the corresponding author please insert his or her name.

#### **2. The work under consideration for publication.**

Please provide information about the work that you have submitted for publication. The time frame for this reporting is that of the work itself, from the initial conception and planning to the present. The idea is to provide for the reader information about resources that you received, either directly or indirectly (via your institution), to enable you to complete the work. If you check the "No" box it means that you did the work without receiving any financial support from any third party -- that is, the work was supported by funds from the same institution that pays your salary and that institution did not receive third-party funds to pay you. If you or your institution did receive funds from a third party to support the work, check "Yes" along with the appropriate boxes to indicate the type of support and whether you or your institution received it.

#### **3. Relevant financial activities outside the submitted work.**

Please report all sources of revenue relevant to the submitted work that accrued either directly to you or were paid to your institution on your behalf over the 36 months prior to submission of the work. This should include all monies from sources with relevance to the submitted work, not just monies from the entity that sponsored the research. If there is any question, it is usually better to disclose a relationship than not to do so. Please note that your interactions with the work's sponsor outside the submitted work should be listed here. For each category list each entity on a separate line. Use as many lines as necessary to provide complete information. In addition, please disclose relationships that fall outside the 36-month window that readers may want to know about and could reasonably criticize you for not disclosing (for example, long-term financial relationships that are now ended).

The goal of this section is to provide information for our reviewers and readers about your interactions with entities in the bio-medical arena that could be perceived to influence, or that give the appearance of potentially influencing, what you wrote in the submitted work. You should disclose interactions with ANY entity that could be considered broadly relevant to the work. For example, if your article is about testing an epidermal growth factor receptor (EGFR) antagonist in lung cancer, you should report all associations with entities pursuing diagnostic or therapeutic strategies in cancer in general, not just in the area of EGFR or lung cancer. For grants you have received for work outside the submitted work, you should disclose support ONLY from entities that could be perceived to benefit financially from the published work, such as drug companies, or foundations supported by entities that could be perceived to have a financial stake in the outcome. Public funding sources, such as the NIH or the MRC, need not be disclosed. For example, if the NIH sponsored a piece of work you have been involved in but drugs were provided by a pharmaceutical company, you need only list the pharmaceutical company.

#### **4. Financial relationships involving your spouse or partner or your children (under 18 years of age).**

If monies from the types of relationships listed in Section 3 were paid to your spouse or partner or dependent children, please list the type of activity and source of the money.

#### **5. Nonfinancial associations.**

Please report any personal, professional, political, institutional, religious, or other associations that a reasonable reader would want to know about in relation to the submitted work.



## ICMJE Uniform Disclosure Form for Potential Conflicts of Interest

### Section 1. Identifying Information.

Given Name:  Surname:  Effective Date:

Format example: 07-August-2008

Are you the corresponding author?  Yes  No

Corresponding author's name:

Manuscript Title:

Manuscript Identifying Number (if you know it):

### Section 2. Information about the support of the work under consideration for publication.

Did you or your institution at any time receive payment or support in kind for any aspect of the submitted work (including but not limited to grants, data monitoring board, study design, manuscript preparation, statistical analysis, etc...)?

No

Yes, specify nature of compensation

If you have more than one relationship, click "Add +" to add a row. Click "Del x" to delete an extra row.

| Type                                                                                                                                 | Money Paid to You*                  |                          | Money to Your Institution           |                                     | Name of Entity | Comments**            |       |
|--------------------------------------------------------------------------------------------------------------------------------------|-------------------------------------|--------------------------|-------------------------------------|-------------------------------------|----------------|-----------------------|-------|
|                                                                                                                                      | No                                  | Yes                      | No                                  | Yes                                 |                |                       |       |
| Grant                                                                                                                                | <input checked="" type="checkbox"/> | <input type="checkbox"/> | <input type="checkbox"/>            | <input checked="" type="checkbox"/> | XDx            | Study grant for IMAGE | Del x |
|                                                                                                                                      |                                     |                          |                                     |                                     |                |                       | Add + |
| Consulting fee or honorarium                                                                                                         | <input checked="" type="checkbox"/> | <input type="checkbox"/> | <input checked="" type="checkbox"/> | <input type="checkbox"/>            |                |                       | Del x |
|                                                                                                                                      |                                     |                          |                                     |                                     |                |                       | Add + |
| Support for travel to meetings for the study or otherwise                                                                            | <input checked="" type="checkbox"/> | <input type="checkbox"/> | <input checked="" type="checkbox"/> | <input type="checkbox"/>            |                |                       | Del x |
|                                                                                                                                      |                                     |                          |                                     |                                     |                |                       | Add + |
| Fees for participation in review activities such as data monitoring boards, statistical analysis, end point committees, and the like | <input checked="" type="checkbox"/> | <input type="checkbox"/> | <input checked="" type="checkbox"/> | <input type="checkbox"/>            |                |                       | Del x |
|                                                                                                                                      |                                     |                          |                                     |                                     |                |                       | Add + |
| Payment for writing or reviewing the manuscript                                                                                      | <input checked="" type="checkbox"/> | <input type="checkbox"/> | <input checked="" type="checkbox"/> | <input type="checkbox"/>            |                |                       | Del x |



**ICMJE Uniform Disclosure Form for Potential Conflicts of Interest**

| Type                                                                                            | Money Paid to You*                  |                          | Money to Your Institution           |                          | Name of Entity | Comments** |       |
|-------------------------------------------------------------------------------------------------|-------------------------------------|--------------------------|-------------------------------------|--------------------------|----------------|------------|-------|
|                                                                                                 |                                     |                          |                                     |                          |                |            | Add + |
| Support in kind such as writing, provision of medicines or equipment, or administrative support | <input checked="" type="checkbox"/> | <input type="checkbox"/> | <input checked="" type="checkbox"/> | <input type="checkbox"/> |                |            | Del × |
|                                                                                                 |                                     |                          |                                     |                          |                |            | Add + |
| Other                                                                                           | <input checked="" type="checkbox"/> | <input type="checkbox"/> | <input checked="" type="checkbox"/> | <input type="checkbox"/> |                |            | Del × |
|                                                                                                 |                                     |                          |                                     |                          |                |            | Add + |

\*\*Use this section to provide any needed explanation

**Section 3. Information about relevant financial relationships outside the submitted work.**

Place a check in the appropriate boxes in the table to indicate whether you have financial relationships (regardless of amount of compensation) with any entities that have an interest related to the submitted work. Use one line for each entity; add as many lines as you need. Use the comments column to indicate any additional information that you think a reader or editor would want to know about the compensation. Report relationships that were present during the 36 months prior to submission. In addition please disclose relationships that fall outside the 36-month window that readers may want to know about and could reasonably criticize you for not disclosing (for example, long-term financial relationships that are now ended).

If you have more than one relationship, click "Add +" to add a row. Click "Del ×" to delete an extra row.

| Type of Relationship (in alphabetical order) | No                                  | Money Paid to You        | Money to Your institution | Entity | Comments |       |
|----------------------------------------------|-------------------------------------|--------------------------|---------------------------|--------|----------|-------|
| Board membership                             | <input checked="" type="checkbox"/> | <input type="checkbox"/> | <input type="checkbox"/>  |        |          | Del × |
|                                              |                                     |                          |                           |        |          | Add + |
| Consultancy                                  | <input checked="" type="checkbox"/> | <input type="checkbox"/> | <input type="checkbox"/>  |        |          | Del × |
|                                              |                                     |                          |                           |        |          | Add + |
| Employment                                   | <input checked="" type="checkbox"/> | <input type="checkbox"/> | <input type="checkbox"/>  |        |          | Del × |
|                                              |                                     |                          |                           |        |          | Add + |
| Expert testimony                             | <input checked="" type="checkbox"/> | <input type="checkbox"/> | <input type="checkbox"/>  |        |          | Del × |
|                                              |                                     |                          |                           |        |          | Add + |
| Gifts                                        | <input checked="" type="checkbox"/> | <input type="checkbox"/> | <input type="checkbox"/>  |        |          | Del × |
|                                              |                                     |                          |                           |        |          | Add + |
| Grants/grants pending                        | <input checked="" type="checkbox"/> | <input type="checkbox"/> | <input type="checkbox"/>  |        |          | Del × |



**ICMJE Uniform Disclosure Form for Potential Conflicts of Interest**

| Type of Relationship<br>(in alphabetical order)                                                      | No                                  | Money<br>Paid to<br>You             | Money to<br>Your<br>institution | Entity                                     | Comments |       |
|------------------------------------------------------------------------------------------------------|-------------------------------------|-------------------------------------|---------------------------------|--------------------------------------------|----------|-------|
|                                                                                                      |                                     |                                     |                                 |                                            |          | Add + |
| Honoraria                                                                                            | <input checked="" type="checkbox"/> | <input type="checkbox"/>            | <input type="checkbox"/>        |                                            |          | Del × |
|                                                                                                      |                                     |                                     |                                 |                                            |          | Add + |
| Payment for manuscript<br>preparation                                                                | <input checked="" type="checkbox"/> | <input type="checkbox"/>            | <input type="checkbox"/>        |                                            |          | Del × |
|                                                                                                      |                                     |                                     |                                 |                                            |          | Add + |
| Patents (planned, pending or<br>issued)                                                              | <input checked="" type="checkbox"/> | <input type="checkbox"/>            | <input type="checkbox"/>        |                                            |          | Del × |
|                                                                                                      |                                     |                                     |                                 |                                            |          | Add + |
| Royalties                                                                                            | <input checked="" type="checkbox"/> | <input type="checkbox"/>            | <input type="checkbox"/>        |                                            |          | Del × |
|                                                                                                      |                                     |                                     |                                 |                                            |          | Add + |
| Payment for development of<br>educational presentations<br>including service on speakers'<br>bureaus | <input checked="" type="checkbox"/> | <input type="checkbox"/>            | <input type="checkbox"/>        |                                            |          | Del × |
|                                                                                                      |                                     |                                     |                                 |                                            |          | Add + |
| Stock/stock options                                                                                  | <input checked="" type="checkbox"/> | <input type="checkbox"/>            | <input type="checkbox"/>        |                                            |          | Del × |
|                                                                                                      |                                     |                                     |                                 |                                            |          | Add + |
| Travel/accommodations<br>expenses covered or<br>reimbursed                                           | <input type="checkbox"/>            | <input checked="" type="checkbox"/> | <input type="checkbox"/>        | Planned trip to hear about<br>Allomap test |          | Del × |
|                                                                                                      |                                     |                                     |                                 |                                            |          | Add + |
| Other (err on the side of full<br>disclosure)                                                        | <input checked="" type="checkbox"/> | <input type="checkbox"/>            | <input type="checkbox"/>        |                                            |          | Del × |
|                                                                                                      |                                     |                                     |                                 |                                            |          | Add + |

**Section 4. Information about financial relationships involving your spouse or partner or your children (under 18 years of age).**

Do your children or your spouse or partner have financial relationships with entities that have an interest in the content of the submitted work?

- No other relationships/conditions/circumstances that present potential conflict of interest
- Yes, the following relationships/conditions/circumstances are present (explain below):

## **ICMJE Uniform Disclosure Form for Potential Conflicts of Interest**

### **Section 5. Information about relevant nonfinancial associations.**

Do you have any relevant nonfinancial associations or interests (personal, professional, political, institutional, religious, or other) that a reasonable reader would want to know about in relation to the submitted work?

- No relevant nonfinancial relationships/conditions/circumstances to report.
- Yes, the following relevant nonfinancial relationships/conditions/circumstances are present (explain below):

At the time of manuscript acceptance, journals will ask authors to confirm and, if necessary, update their disclosure statements. On occasion, journals may ask authors to disclose further information about reported relationships.

Save Form

## ICMJE Uniform Disclosure Form for Potential Conflicts of Interest

### INSTRUCTIONS:

The purpose of this form is to provide readers of your manuscript with information about your other interests that could influence how they receive and understand your work. The form has five parts.

#### 1. Identifying information.

Each author should submit a separate form. Provide complete information and double-check the manuscript number. If you are NOT the corresponding author please insert his or her name.

#### 2. The work under consideration for publication.

Please provide information about the work that you have submitted for publication. The time frame for this reporting is that of the work itself, from the initial conception and planning to the present. The idea is to provide for the reader information about resources that you received, either directly or indirectly (via your institution), to enable you to complete the work. If you check the "No" box it means that you did the work without receiving any financial support from any third party -- that is, the work was supported by funds from the same institution that pays your salary and that institution did not receive third-party funds to pay you. If you or your institution did receive funds from a third party to support the work, check "Yes" along with the appropriate boxes to indicate the type of support and whether you or your institution received it.

#### 3. Relevant financial activities outside the submitted work.

Please report all sources of revenue relevant to the submitted work that accrued either directly to you or were paid to your institution on your behalf over the 36 months prior to submission of the work. This should include all monies from sources with relevance to the submitted work, not just monies from the entity that sponsored the research. If there is any question, it is usually better to disclose a relationship than not to do so. Please note that your interactions with the work's sponsor outside the submitted work should be listed here. For each category list each entity on a separate line. Use as many lines as necessary to provide complete information. In addition, please disclose relationships that fall outside the 36-month window that readers may want to know about and could reasonably criticize you for not disclosing (for example, long-term financial relationships that are now ended).

The goal of this section is to provide information for our reviewers and readers about your interactions with entities in the biomedical arena that could be perceived to influence, or that give the appearance of potentially influencing, what you wrote in the submitted work. You should disclose interactions with ANY entity that could be considered broadly relevant to the work. For example, if your article is about testing an epidermal growth factor receptor (EGFR) antagonist in lung cancer, you should report all associations with entities pursuing diagnostic or therapeutic strategies in cancer in general, not just in the area of EGFR or lung cancer. For grants you have received for work outside the submitted work, you should disclose support ONLY from entities that could be perceived to benefit financially from the published work, such as drug companies, or foundations supported by entities that could be perceived to have a financial stake in the outcome. Public funding sources, such as the NIH or the MRC, need not be disclosed. For example, if the NIH sponsored a piece of work you have been involved in but drugs were provided by a pharmaceutical company, you need only list the pharmaceutical company.

#### 4. Financial relationships involving your spouse or partner or your children (under 18 years of age).

If monies from the types of relationships listed in Section 3 were paid to your spouse or partner or dependent children, please list the type of activity and source of the money.

#### 5. Nonfinancial associations.

Please report any personal, professional, political, institutional, religious, or other associations that a reasonable reader would want to know about in relation to the submitted work.



## ICMJE Uniform Disclosure Form for Potential Conflicts of Interest

### Section 1. Identifying Information.

Given Name:  Surname:  Effective Date:

Format example: 07-August-2008

Are you the corresponding author?  Yes  No

Corresponding author's name:

Manuscript Title:

Manuscript Identifying Number (if you know it):

### Section 2. Information about the support of the work under consideration for publication.

Did you or your institution at any time receive payment or support in kind for any aspect of the submitted work (including but not limited to grants, data monitoring board, study design, manuscript preparation, statistical analysis, etc...)?

No

Yes, specify nature of compensation

If you have more than one relationship, click "Add +" to add a row. Click "Del x" to delete an extra row.

| Type                                                      | Money Paid to You*                  |                                     | Money to Your Institution           |                                     | Name of Entity                          | Comments**                                                                                                                        |       |
|-----------------------------------------------------------|-------------------------------------|-------------------------------------|-------------------------------------|-------------------------------------|-----------------------------------------|-----------------------------------------------------------------------------------------------------------------------------------|-------|
|                                                           | No                                  | Yes                                 | No                                  | Yes                                 |                                         |                                                                                                                                   |       |
| Grant                                                     | <input checked="" type="checkbox"/> | <input type="checkbox"/>            | <input type="checkbox"/>            | <input checked="" type="checkbox"/> | XDx Inc<br>BIT2 (Canada Genome Project) | Study Grant to develop AlloMap (Deng MC et al. Am J Transplant 2006;6:150)<br>Validation of next generation Transplant Biomarkers | Del x |
|                                                           |                                     |                                     |                                     |                                     |                                         |                                                                                                                                   | Add + |
| Consulting fee or honorarium                              | <input type="checkbox"/>            | <input checked="" type="checkbox"/> | <input checked="" type="checkbox"/> | <input type="checkbox"/>            | XDx Inc                                 | Honoraria for giving talks on AlloMap                                                                                             | Del x |
|                                                           |                                     |                                     |                                     |                                     |                                         |                                                                                                                                   | Add + |
| Support for travel to meetings for the study or otherwise | <input type="checkbox"/>            | <input checked="" type="checkbox"/> | <input checked="" type="checkbox"/> | <input type="checkbox"/>            | XDx Inc                                 | Travel expenses to steering committee meetings and to give talks on behalf of AlloMap reimbursed by XDx                           | Del x |
|                                                           |                                     |                                     |                                     |                                     |                                         |                                                                                                                                   | Add + |



**ICMJE Uniform Disclosure Form for Potential Conflicts of Interest**

| Type                                                                                                                                 | Money Paid to You*                  |                          | Money to Your Institution           |                          | Name of Entity | Comments** |       |
|--------------------------------------------------------------------------------------------------------------------------------------|-------------------------------------|--------------------------|-------------------------------------|--------------------------|----------------|------------|-------|
| Fees for participation in review activities such as data monitoring boards, statistical analysis, end point committees, and the like | <input checked="" type="checkbox"/> | <input type="checkbox"/> | <input checked="" type="checkbox"/> | <input type="checkbox"/> |                |            | Del × |
|                                                                                                                                      |                                     |                          |                                     |                          |                |            | Add + |
| Payment for writing or reviewing the manuscript                                                                                      | <input checked="" type="checkbox"/> | <input type="checkbox"/> | <input checked="" type="checkbox"/> | <input type="checkbox"/> |                |            | Del × |
|                                                                                                                                      |                                     |                          |                                     |                          |                |            | Add + |
| Support in kind such as writing, provision of medicines or equipment, or administrative support                                      | <input checked="" type="checkbox"/> | <input type="checkbox"/> | <input checked="" type="checkbox"/> | <input type="checkbox"/> |                |            | Del × |
|                                                                                                                                      |                                     |                          |                                     |                          |                |            | Add + |
| Other                                                                                                                                | <input checked="" type="checkbox"/> | <input type="checkbox"/> | <input checked="" type="checkbox"/> | <input type="checkbox"/> |                |            | Del × |
|                                                                                                                                      |                                     |                          |                                     |                          |                |            | Add + |

\*\*Use this section to provide any needed explanation

**Section 3. Information about relevant financial relationships outside the submitted work.**

Place a check in the appropriate boxes in the table to indicate whether you have financial relationships (regardless of amount of compensation) with any entities that have an interest related to the submitted work. Use one line for each entity; add as many lines as you need. Use the comments column to indicate any additional information that you think a reader or editor would want to know about the compensation. Report relationships that were present during the 36 months prior to submission. In addition please disclose relationships that fall outside the 36-month window that readers may want to know about and could reasonably criticize you for not disclosing (for example, long-term financial relationships that are now ended).

If you have more than one relationship, click "Add +" to add a row. Click "Del ×" to delete an extra row.

| Type of Relationship (in alphabetical order) | No                                  | Money Paid to You                   | Money to Your institution | Entity  | Comments |       |
|----------------------------------------------|-------------------------------------|-------------------------------------|---------------------------|---------|----------|-------|
| Board membership                             | <input checked="" type="checkbox"/> | <input type="checkbox"/>            | <input type="checkbox"/>  |         |          | Del × |
|                                              |                                     |                                     |                           |         |          | Add + |
| Consultancy                                  | <input type="checkbox"/>            | <input checked="" type="checkbox"/> | <input type="checkbox"/>  | XDx Inc |          | Del × |
|                                              |                                     |                                     |                           |         |          | Add + |
| Employment                                   | <input checked="" type="checkbox"/> | <input type="checkbox"/>            | <input type="checkbox"/>  |         |          | Del × |

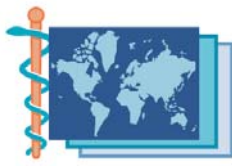

**ICMJE Uniform Disclosure Form for Potential Conflicts of Interest**

| Type of Relationship<br>(in alphabetical order)                                                      | No                                  | Money<br>Paid to<br>You             | Money to<br>Your<br>institution     | Entity                        | Comments                                                                                                               |       |
|------------------------------------------------------------------------------------------------------|-------------------------------------|-------------------------------------|-------------------------------------|-------------------------------|------------------------------------------------------------------------------------------------------------------------|-------|
|                                                                                                      |                                     |                                     |                                     |                               |                                                                                                                        | Add + |
| Expert testimony                                                                                     | <input type="checkbox"/>            | <input checked="" type="checkbox"/> | <input type="checkbox"/>            | XDx Inc                       | 1) Centers for Medicare<br>Medicaid Services<br>2) Medicare California<br>3) California Technology<br>Assessment Forum | Del × |
|                                                                                                      |                                     |                                     |                                     |                               |                                                                                                                        | Add + |
| Gifts                                                                                                | <input checked="" type="checkbox"/> | <input type="checkbox"/>            | <input type="checkbox"/>            |                               |                                                                                                                        | Del × |
|                                                                                                      |                                     |                                     |                                     |                               |                                                                                                                        | Add + |
| Grants/grants pending                                                                                | <input type="checkbox"/>            | <input type="checkbox"/>            | <input checked="" type="checkbox"/> | XDx Inc<br>Canada Genome BIT2 |                                                                                                                        | Del × |
|                                                                                                      |                                     |                                     |                                     |                               |                                                                                                                        | Add + |
| Honoraria                                                                                            | <input type="checkbox"/>            | <input checked="" type="checkbox"/> | <input type="checkbox"/>            | XDx Inc                       | consulting<br>Clinical Physician Fora<br>Grand Round talks                                                             | Del × |
|                                                                                                      |                                     |                                     |                                     |                               |                                                                                                                        | Add + |
| Payment for manuscript<br>preparation                                                                | <input checked="" type="checkbox"/> | <input type="checkbox"/>            | <input type="checkbox"/>            |                               |                                                                                                                        | Del × |
|                                                                                                      |                                     |                                     |                                     |                               |                                                                                                                        | Add + |
| Patents (planned, pending or<br>issued)                                                              | <input checked="" type="checkbox"/> | <input type="checkbox"/>            | <input type="checkbox"/>            |                               |                                                                                                                        | Del × |
|                                                                                                      |                                     |                                     |                                     |                               |                                                                                                                        | Add + |
| Royalties                                                                                            | <input checked="" type="checkbox"/> | <input type="checkbox"/>            | <input type="checkbox"/>            |                               |                                                                                                                        | Del × |
|                                                                                                      |                                     |                                     |                                     |                               |                                                                                                                        | Add + |
| Payment for development of<br>educational presentations<br>including service on speakers'<br>bureaus | <input type="checkbox"/>            | <input checked="" type="checkbox"/> | <input type="checkbox"/>            | XDx Inc                       | preparation for educational<br>sessions                                                                                | Del × |
|                                                                                                      |                                     |                                     |                                     |                               |                                                                                                                        | Add + |
| Stock/stock options                                                                                  | <input checked="" type="checkbox"/> | <input type="checkbox"/>            | <input type="checkbox"/>            |                               |                                                                                                                        | Del × |
|                                                                                                      |                                     |                                     |                                     |                               |                                                                                                                        | Add + |
| Travel/accommodations<br>expenses covered or<br>reimbursed                                           | <input type="checkbox"/>            | <input checked="" type="checkbox"/> | <input type="checkbox"/>            | XDx Inc<br>Canda Genome BIT2  |                                                                                                                        | Del × |
|                                                                                                      |                                     |                                     |                                     |                               |                                                                                                                        | Add + |
| Other (err on the side of full<br>disclosure)                                                        | <input checked="" type="checkbox"/> | <input type="checkbox"/>            | <input type="checkbox"/>            |                               |                                                                                                                        | Del × |

## ICMJE Uniform Disclosure Form for Potential Conflicts of Interest

| Type of Relationship<br>(in alphabetical order) | No | Money<br>Paid to<br>You | Money to<br>Your<br>institution | Entity | Comments |       |
|-------------------------------------------------|----|-------------------------|---------------------------------|--------|----------|-------|
|                                                 |    |                         |                                 |        |          | Add + |

### Section 4. Information about financial relationships involving your spouse or partner or your children (under 18 years of age).

Do your children or your spouse or partner have financial relationships with entities that have an interest in the content of the submitted work?

- No other relationships/conditions/circumstances that present potential conflict of interest  
 Yes, the following relationships/conditions/circumstances are present (explain below):

### Section 5. Information about relevant nonfinancial associations.

Do you have any relevant nonfinancial associations or interests (personal, professional, political, institutional, religious, or other) that a reasonable reader would want to know about in relation to the submitted work?

- No relevant nonfinancial relationships/conditions/circumstances to report.  
 Yes, the following relevant nonfinancial relationships/conditions/circumstances are present (explain below):

At the time of manuscript acceptance, journals will ask authors to confirm and, if necessary, update their disclosure statements. On occasion, journals may ask authors to disclose further information about reported relationships.

Save Form

## ICMJE Uniform Disclosure Form for Potential Conflicts of Interest

### INSTRUCTIONS:

The purpose of this form is to provide readers of your manuscript with information about your other interests that could influence how they receive and understand your work. The form has five parts.

#### 1. Identifying information.

Each author should submit a separate form. Provide complete information and double-check the manuscript number. If you are NOT the corresponding author please insert his or her name.

#### 2. The work under consideration for publication.

Please provide information about the work that you have submitted for publication. The time frame for this reporting is that of the work itself, from the initial conception and planning to the present. The idea is to provide for the reader information about resources that you received, either directly or indirectly (via your institution), to enable you to complete the work. If you check the "No" box it means that you did the work without receiving any financial support from any third party -- that is, the work was supported by funds from the same institution that pays your salary and that institution did not receive third-party funds to pay you. If you or your institution did receive funds from a third party to support the work, check "Yes" along with the appropriate boxes to indicate the type of support and whether you or your institution received it.

#### 3. Relevant financial activities outside the submitted work.

Please report all sources of revenue relevant to the submitted work that accrued either directly to you or were paid to your institution on your behalf over the 36 months prior to submission of the work. This should include all monies from sources with relevance to the submitted work, not just monies from the entity that sponsored the research. If there is any question, it is usually better to disclose a relationship than not to do so. Please note that your interactions with the work's sponsor outside the submitted work should be listed here. For each category list each entity on a separate line. Use as many lines as necessary to provide complete information. In addition, please disclose relationships that fall outside the 36-month window that readers may want to know about and could reasonably criticize you for not disclosing (for example, long-term financial relationships that are now ended).

The goal of this section is to provide information for our reviewers and readers about your interactions with entities in the biomedical arena that could be perceived to influence, or that give the appearance of potentially influencing, what you wrote in the submitted work. You should disclose interactions with ANY entity that could be considered broadly relevant to the work. For example, if your article is about testing an epidermal growth factor receptor (EGFR) antagonist in lung cancer, you should report all associations with entities pursuing diagnostic or therapeutic strategies in cancer in general, not just in the area of EGFR or lung cancer. For grants you have received for work outside the submitted work, you should disclose support ONLY from entities that could be perceived to benefit financially from the published work, such as drug companies, or foundations supported by entities that could be perceived to have a financial stake in the outcome. Public funding sources, such as the NIH or the MRC, need not be disclosed. For example, if the NIH sponsored a piece of work you have been involved in but drugs were provided by a pharmaceutical company, you need only list the pharmaceutical company.

#### 4. Financial relationships involving your spouse or partner or your children (under 18 years of age).

If monies from the types of relationships listed in Section 3 were paid to your spouse or partner or dependent children, please list the type of activity and source of the money.

#### 5. Nonfinancial associations.

Please report any personal, professional, political, institutional, religious, or other associations that a reasonable reader would want to know about in relation to the submitted work.



## ICMJE Uniform Disclosure Form for Potential Conflicts of Interest

### Section 1. Identifying Information.

Given Name:  Surname:  Effective Date:

Format example: 07-August-2008

Are you the corresponding author?  Yes  No

Corresponding author's name:

Manuscript Title:

Manuscript Identifying Number (if you know it):

### Section 2. Information about the support of the work under consideration for publication.

Did you or your institution at any time receive payment or support in kind for any aspect of the submitted work (including but not limited to grants, data monitoring board, study design, manuscript preparation, statistical analysis, etc...)?

No

Yes, specify nature of compensation

If you have more than one relationship, click "Add +" to add a row. Click "Del x" to delete an extra row.

| Type                                                                                                                                 | Money Paid to You*                  |                                     | Money to Your Institution           |                          | Name of Entity | Comments**                   |       |
|--------------------------------------------------------------------------------------------------------------------------------------|-------------------------------------|-------------------------------------|-------------------------------------|--------------------------|----------------|------------------------------|-------|
|                                                                                                                                      | No                                  | Yes                                 | No                                  | Yes                      |                |                              |       |
| Grant                                                                                                                                | <input checked="" type="checkbox"/> | <input type="checkbox"/>            | <input checked="" type="checkbox"/> | <input type="checkbox"/> |                |                              | Del x |
|                                                                                                                                      |                                     |                                     |                                     |                          |                |                              | Add + |
| Consulting fee or honorarium                                                                                                         | <input checked="" type="checkbox"/> | <input type="checkbox"/>            | <input checked="" type="checkbox"/> | <input type="checkbox"/> |                |                              | Del x |
|                                                                                                                                      |                                     |                                     |                                     |                          |                |                              | Add + |
| Support for travel to meetings for the study or otherwise                                                                            | <input checked="" type="checkbox"/> | <input type="checkbox"/>            | <input checked="" type="checkbox"/> | <input type="checkbox"/> |                |                              | Del x |
|                                                                                                                                      |                                     |                                     |                                     |                          |                |                              | Add + |
| Fees for participation in review activities such as data monitoring boards, statistical analysis, end point committees, and the like | <input type="checkbox"/>            | <input checked="" type="checkbox"/> | <input checked="" type="checkbox"/> | <input type="checkbox"/> | XDx            | For statistical analysis     | Del x |
|                                                                                                                                      |                                     |                                     |                                     |                          |                |                              | Add + |
| Payment for writing or reviewing the manuscript                                                                                      | <input type="checkbox"/>            | <input checked="" type="checkbox"/> | <input checked="" type="checkbox"/> | <input type="checkbox"/> | XDx            | For reviewing the manuscript | Del x |



**ICMJE Uniform Disclosure Form for Potential Conflicts of Interest**

| Type                                                                                            | Money Paid to You*                  |                          | Money to Your Institution           |                          | Name of Entity | Comments** |       |
|-------------------------------------------------------------------------------------------------|-------------------------------------|--------------------------|-------------------------------------|--------------------------|----------------|------------|-------|
|                                                                                                 |                                     |                          |                                     |                          |                |            | Add + |
| Support in kind such as writing, provision of medicines or equipment, or administrative support | <input checked="" type="checkbox"/> | <input type="checkbox"/> | <input checked="" type="checkbox"/> | <input type="checkbox"/> |                |            | Del × |
|                                                                                                 |                                     |                          |                                     |                          |                |            | Add + |
| Other                                                                                           | <input checked="" type="checkbox"/> | <input type="checkbox"/> | <input checked="" type="checkbox"/> | <input type="checkbox"/> |                |            | Del × |
|                                                                                                 |                                     |                          |                                     |                          |                |            | Add + |

\*\*Use this section to provide any needed explanation

**Section 3. Information about relevant financial relationships outside the submitted work.**

Place a check in the appropriate boxes in the table to indicate whether you have financial relationships (regardless of amount of compensation) with any entities that have an interest related to the submitted work. Use one line for each entity; add as many lines as you need. Use the comments column to indicate any additional information that you think a reader or editor would want to know about the compensation. Report relationships that were present during the 36 months prior to submission. In addition please disclose relationships that fall outside the 36-month window that readers may want to know about and could reasonably criticize you for not disclosing (for example, long-term financial relationships that are now ended).

If you have more than one relationship, click "Add +" to add a row. Click "Del ×" to delete an extra row.

| Type of Relationship (in alphabetical order) | No                                  | Money Paid to You                   | Money to Your institution | Entity                        | Comments                     |       |
|----------------------------------------------|-------------------------------------|-------------------------------------|---------------------------|-------------------------------|------------------------------|-------|
| Board membership                             | <input checked="" type="checkbox"/> | <input type="checkbox"/>            | <input type="checkbox"/>  |                               |                              | Del × |
|                                              |                                     |                                     |                           |                               |                              | Add + |
| Consultancy                                  | <input type="checkbox"/>            | <input checked="" type="checkbox"/> | <input type="checkbox"/>  | XDx                           | Biostatistics consulting     | Del × |
| Consultancy                                  | <input type="checkbox"/>            | <input checked="" type="checkbox"/> | <input type="checkbox"/>  | Lux Biosciences               | Biostatistics consulting     | Del × |
| Consultancy                                  | <input type="checkbox"/>            | <input checked="" type="checkbox"/> | <input type="checkbox"/>  | Pacira Pharmaceuticals        | Biostatistics consulting     | Del × |
| Consultancy                                  | <input type="checkbox"/>            | <input checked="" type="checkbox"/> | <input type="checkbox"/>  | Cerimon Pharmaceuticals       | Biostatistics consulting     | Del × |
| Consultancy                                  | <input type="checkbox"/>            | <input checked="" type="checkbox"/> | <input type="checkbox"/>  | Corcept Pharmaceuticals       | Biostatistics consulting     | Del × |
| Consultancy                                  | <input type="checkbox"/>            | <input checked="" type="checkbox"/> | <input type="checkbox"/>  | CBR International Corporation | Biostatistics consulting     | Del × |
| Consultancy                                  | <input type="checkbox"/>            | <input checked="" type="checkbox"/> | <input type="checkbox"/>  | KAI Research                  | Biostatistics consulting     | Del × |
| Consultancy                                  | <input type="checkbox"/>            | <input checked="" type="checkbox"/> | <input type="checkbox"/>  | The Emmes Corporation         | Sale of statistical software | Del × |
| Consultancy                                  | <input type="checkbox"/>            | <input checked="" type="checkbox"/> | <input type="checkbox"/>  | Allergan Pharmaceuticals      | Sale of statistical software | Del × |

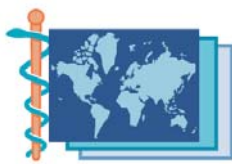

**ICMJE Uniform Disclosure Form for Potential Conflicts of Interest**

| Type of Relationship<br>(in alphabetical order)                                             | No                                  | Money<br>Paid to<br>You             | Money to<br>Your<br>institution | Entity                   | Comments                     |       |
|---------------------------------------------------------------------------------------------|-------------------------------------|-------------------------------------|---------------------------------|--------------------------|------------------------------|-------|
| Consultancy                                                                                 | <input type="checkbox"/>            | <input checked="" type="checkbox"/> | <input type="checkbox"/>        | University of Texas      | Sale of statistical software | Del × |
| Consultancy                                                                                 | <input type="checkbox"/>            | <input checked="" type="checkbox"/> | <input type="checkbox"/>        | Seattle Genetics         | Biostatistics consulting     | Del × |
| Consultancy                                                                                 | <input type="checkbox"/>            | <input checked="" type="checkbox"/> | <input type="checkbox"/>        | Gerson Lehman Group      | Biostatistics consulting     | Del × |
| Consultancy                                                                                 | <input type="checkbox"/>            | <input checked="" type="checkbox"/> | <input type="checkbox"/>        | Transdel Pharmaceuticals | Biostatistics consulting     | Del × |
| Consultancy                                                                                 | <input type="checkbox"/>            | <input checked="" type="checkbox"/> | <input type="checkbox"/>        | Veracyte                 | Biostatistics consulting     | Del × |
|                                                                                             |                                     |                                     |                                 |                          |                              | Add + |
| Employment                                                                                  | <input checked="" type="checkbox"/> | <input type="checkbox"/>            | <input type="checkbox"/>        |                          |                              | Del × |
|                                                                                             |                                     |                                     |                                 |                          |                              | Add + |
| Expert testimony                                                                            | <input checked="" type="checkbox"/> | <input type="checkbox"/>            | <input type="checkbox"/>        |                          |                              | Del × |
|                                                                                             |                                     |                                     |                                 |                          |                              | Add + |
| Gifts                                                                                       | <input checked="" type="checkbox"/> | <input type="checkbox"/>            | <input type="checkbox"/>        |                          |                              | Del × |
|                                                                                             |                                     |                                     |                                 |                          |                              | Add + |
| Grants/grants pending                                                                       | <input checked="" type="checkbox"/> | <input type="checkbox"/>            | <input type="checkbox"/>        |                          |                              | Del × |
|                                                                                             |                                     |                                     |                                 |                          |                              | Add + |
| Honoraria                                                                                   | <input checked="" type="checkbox"/> | <input type="checkbox"/>            | <input type="checkbox"/>        |                          |                              | Del × |
|                                                                                             |                                     |                                     |                                 |                          |                              | Add + |
| Payment for manuscript preparation                                                          | <input checked="" type="checkbox"/> | <input type="checkbox"/>            | <input type="checkbox"/>        |                          |                              | Del × |
|                                                                                             |                                     |                                     |                                 |                          |                              | Add + |
| Patents (planned, pending or issued)                                                        | <input checked="" type="checkbox"/> | <input type="checkbox"/>            | <input type="checkbox"/>        |                          |                              | Del × |
|                                                                                             |                                     |                                     |                                 |                          |                              | Add + |
| Royalties                                                                                   | <input checked="" type="checkbox"/> | <input type="checkbox"/>            | <input type="checkbox"/>        |                          |                              | Del × |
|                                                                                             |                                     |                                     |                                 |                          |                              | Add + |
| Payment for development of educational presentations including service on speakers' bureaus | <input checked="" type="checkbox"/> | <input type="checkbox"/>            | <input type="checkbox"/>        |                          |                              | Del × |
|                                                                                             |                                     |                                     |                                 |                          |                              | Add + |
| Stock/stock options                                                                         | <input checked="" type="checkbox"/> | <input type="checkbox"/>            | <input type="checkbox"/>        |                          |                              | Del × |
|                                                                                             |                                     |                                     |                                 |                          |                              | Add + |

## ICMJE Uniform Disclosure Form for Potential Conflicts of Interest

| Type of Relationship<br>(in alphabetical order)      | No                                  | Money<br>Paid to<br>You             | Money to<br>Your<br>institution | Entity | Comments                    |       |
|------------------------------------------------------|-------------------------------------|-------------------------------------|---------------------------------|--------|-----------------------------|-------|
| Travel/accommodations expenses covered or reimbursed | <input type="checkbox"/>            | <input checked="" type="checkbox"/> | <input type="checkbox"/>        | XDx    | Travel expenses reimbursed. | Del × |
|                                                      |                                     |                                     |                                 |        |                             | Add + |
| Other (err on the side of full disclosure)           | <input checked="" type="checkbox"/> | <input type="checkbox"/>            | <input type="checkbox"/>        |        |                             | Del × |
|                                                      |                                     |                                     |                                 |        |                             | Add + |

### Section 4. Information about financial relationships involving your spouse or partner or your children (under 18 years of age).

Do your children or your spouse or partner have financial relationships with entities that have an interest in the content of the submitted work?

- No other relationships/conditions/circumstances that present potential conflict of interest
- Yes, the following relationships/conditions/circumstances are present (explain below):

### Section 5. Information about relevant nonfinancial associations.

Do you have any relevant nonfinancial associations or interests (personal, professional, political, institutional, religious, or other) that a reasonable reader would want to know about in relation to the submitted work?

- No relevant nonfinancial relationships/conditions/circumstances to report.
- Yes, the following relevant nonfinancial relationships/conditions/circumstances are present (explain below):

At the time of manuscript acceptance, journals will ask authors to confirm and, if necessary, update their disclosure statements. On occasion, journals may ask authors to disclose further information about reported relationships.

Save Form

## **ICMJE Uniform Disclosure Form for Potential Conflicts of Interest**

### **INSTRUCTIONS:**

The purpose of this form is to provide readers of your manuscript with information about your other interests that could influence how they receive and understand your work. The form has five parts.

#### **1. Identifying information.**

Each author should submit a separate form. Provide complete information and double-check the manuscript number. If you are NOT the corresponding author please insert his or her name.

#### **2. The work under consideration for publication.**

Please provide information about the work that you have submitted for publication. The time frame for this reporting is that of the work itself, from the initial conception and planning to the present. The idea is to provide for the reader information about resources that you received, either directly or indirectly (via your institution), to enable you to complete the work. If you check the "No" box it means that you did the work without receiving any financial support from any third party -- that is, the work was supported by funds from the same institution that pays your salary and that institution did not receive third-party funds to pay you. If you or your institution did receive funds from a third party to support the work, check "Yes" along with the appropriate boxes to indicate the type of support and whether you or your institution received it.

#### **3. Relevant financial activities outside the submitted work.**

Please report all sources of revenue relevant to the submitted work that accrued either directly to you or were paid to your institution on your behalf over the 36 months prior to submission of the work. This should include all monies from sources with relevance to the submitted work, not just monies from the entity that sponsored the research. If there is any question, it is usually better to disclose a relationship than not to do so. Please note that your interactions with the work's sponsor outside the submitted work should be listed here. For each category list each entity on a separate line. Use as many lines as necessary to provide complete information. In addition, please disclose relationships that fall outside the 36-month window that readers may want to know about and could reasonably criticize you for not disclosing (for example, long-term financial relationships that are now ended).

The goal of this section is to provide information for our reviewers and readers about your interactions with entities in the biomedical arena that could be perceived to influence, or that give the appearance of potentially influencing, what you wrote in the submitted work. You should disclose interactions with ANY entity that could be considered broadly relevant to the work. For example, if your article is about testing an epidermal growth factor receptor (EGFR) antagonist in lung cancer, you should report all associations with entities pursuing diagnostic or therapeutic strategies in cancer in general, not just in the area of EGFR or lung cancer. For grants you have received for work outside the submitted work, you should disclose support ONLY from entities that could be perceived to benefit financially from the published work, such as drug companies, or foundations supported by entities that could be perceived to have a financial stake in the outcome. Public funding sources, such as the NIH or the MRC, need not be disclosed. For example, if the NIH sponsored a piece of work you have been involved in but drugs were provided by a pharmaceutical company, you need only list the pharmaceutical company.

#### **4. Financial relationships involving your spouse or partner or your children (under 18 years of age).**

If monies from the types of relationships listed in Section 3 were paid to your spouse or partner or dependent children, please list the type of activity and source of the money.

#### **5. Nonfinancial associations.**

Please report any personal, professional, political, institutional, religious, or other associations that a reasonable reader would want to know about in relation to the submitted work.



## ICMJE Uniform Disclosure Form for Potential Conflicts of Interest

### Section 1. Identifying Information.

Given Name:  Surname:  Effective Date:

Format example: 07-August-2008

Are you the corresponding author?  Yes  No

Corresponding author's name:

Manuscript Title:

Manuscript Identifying Number (if you know it):

### Section 2. Information about the support of the work under consideration for publication.

Did you or your institution at any time receive payment or support in kind for any aspect of the submitted work (including but not limited to grants, data monitoring board, study design, manuscript preparation, statistical analysis, etc...)?

No

Yes, specify nature of compensation

If you have more than one relationship, click "Add +" to add a row. Click "Del x" to delete an extra row.

| Type                                                                                                                                 | Money Paid to You*                  |                          | Money to Your Institution           |                                     | Name of Entity | Comments**            |       |
|--------------------------------------------------------------------------------------------------------------------------------------|-------------------------------------|--------------------------|-------------------------------------|-------------------------------------|----------------|-----------------------|-------|
|                                                                                                                                      | No                                  | Yes                      | No                                  | Yes                                 |                |                       |       |
| Grant                                                                                                                                | <input checked="" type="checkbox"/> | <input type="checkbox"/> | <input type="checkbox"/>            | <input checked="" type="checkbox"/> | XDX Inc.       | Study grant for IMAGE | Del x |
|                                                                                                                                      |                                     |                          |                                     |                                     |                |                       | Add + |
| Consulting fee or honorarium                                                                                                         | <input checked="" type="checkbox"/> | <input type="checkbox"/> | <input checked="" type="checkbox"/> | <input type="checkbox"/>            |                |                       | Del x |
|                                                                                                                                      |                                     |                          |                                     |                                     |                |                       | Add + |
| Support for travel to meetings for the study or otherwise                                                                            | <input checked="" type="checkbox"/> | <input type="checkbox"/> | <input checked="" type="checkbox"/> | <input type="checkbox"/>            |                |                       | Del x |
|                                                                                                                                      |                                     |                          |                                     |                                     |                |                       | Add + |
| Fees for participation in review activities such as data monitoring boards, statistical analysis, end point committees, and the like | <input checked="" type="checkbox"/> | <input type="checkbox"/> | <input checked="" type="checkbox"/> | <input type="checkbox"/>            |                |                       | Del x |
|                                                                                                                                      |                                     |                          |                                     |                                     |                |                       | Add + |
| Payment for writing or reviewing the manuscript                                                                                      | <input checked="" type="checkbox"/> | <input type="checkbox"/> | <input checked="" type="checkbox"/> | <input type="checkbox"/>            |                |                       | Del x |



**ICMJE Uniform Disclosure Form for Potential Conflicts of Interest**

| Type                                                                                            | Money Paid to You*                  |                          | Money to Your Institution           |                          | Name of Entity | Comments** |       |
|-------------------------------------------------------------------------------------------------|-------------------------------------|--------------------------|-------------------------------------|--------------------------|----------------|------------|-------|
|                                                                                                 |                                     |                          |                                     |                          |                |            | Add + |
| Support in kind such as writing, provision of medicines or equipment, or administrative support | <input checked="" type="checkbox"/> | <input type="checkbox"/> | <input checked="" type="checkbox"/> | <input type="checkbox"/> |                |            | Del × |
|                                                                                                 |                                     |                          |                                     |                          |                |            | Add + |
| Other                                                                                           | <input checked="" type="checkbox"/> | <input type="checkbox"/> | <input checked="" type="checkbox"/> | <input type="checkbox"/> |                |            | Del × |
|                                                                                                 |                                     |                          |                                     |                          |                |            | Add + |

\*\*Use this section to provide any needed explanation

**Section 3. Information about relevant financial relationships outside the submitted work.**

Place a check in the appropriate boxes in the table to indicate whether you have financial relationships (regardless of amount of compensation) with any entities that have an interest related to the submitted work. Use one line for each entity; add as many lines as you need. Use the comments column to indicate any additional information that you think a reader or editor would want to know about the compensation. Report relationships that were present during the 36 months prior to submission. In addition please disclose relationships that fall outside the 36-month window that readers may want to know about and could reasonably criticize you for not disclosing (for example, long-term financial relationships that are now ended).

If you have more than one relationship, click "Add +" to add a row. Click "Del ×" to delete an extra row.

| Type of Relationship (in alphabetical order) | No                                  | Money Paid to You        | Money to Your institution | Entity | Comments |       |
|----------------------------------------------|-------------------------------------|--------------------------|---------------------------|--------|----------|-------|
| Board membership                             | <input checked="" type="checkbox"/> | <input type="checkbox"/> | <input type="checkbox"/>  |        |          | Del × |
|                                              |                                     |                          |                           |        |          | Add + |
| Consultancy                                  | <input checked="" type="checkbox"/> | <input type="checkbox"/> | <input type="checkbox"/>  |        |          | Del × |
|                                              |                                     |                          |                           |        |          | Add + |
| Employment                                   | <input checked="" type="checkbox"/> | <input type="checkbox"/> | <input type="checkbox"/>  |        |          | Del × |
|                                              |                                     |                          |                           |        |          | Add + |
| Expert testimony                             | <input checked="" type="checkbox"/> | <input type="checkbox"/> | <input type="checkbox"/>  |        |          | Del × |
|                                              |                                     |                          |                           |        |          | Add + |
| Gifts                                        | <input checked="" type="checkbox"/> | <input type="checkbox"/> | <input type="checkbox"/>  |        |          | Del × |
|                                              |                                     |                          |                           |        |          | Add + |
| Grants/grants pending                        | <input checked="" type="checkbox"/> | <input type="checkbox"/> | <input type="checkbox"/>  |        |          | Del × |



**ICMJE Uniform Disclosure Form for Potential Conflicts of Interest**

| Type of Relationship<br>(in alphabetical order)                                                      | No                                  | Money<br>Paid to<br>You  | Money to<br>Your<br>institution | Entity | Comments |       |
|------------------------------------------------------------------------------------------------------|-------------------------------------|--------------------------|---------------------------------|--------|----------|-------|
|                                                                                                      |                                     |                          |                                 |        |          | Add + |
| Honoraria                                                                                            | <input checked="" type="checkbox"/> | <input type="checkbox"/> | <input type="checkbox"/>        |        |          | Del × |
|                                                                                                      |                                     |                          |                                 |        |          | Add + |
| Payment for manuscript<br>preparation                                                                | <input checked="" type="checkbox"/> | <input type="checkbox"/> | <input type="checkbox"/>        |        |          | Del × |
|                                                                                                      |                                     |                          |                                 |        |          | Add + |
| Patents (planned, pending or<br>issued)                                                              | <input checked="" type="checkbox"/> | <input type="checkbox"/> | <input type="checkbox"/>        |        |          | Del × |
|                                                                                                      |                                     |                          |                                 |        |          | Add + |
| Royalties                                                                                            | <input checked="" type="checkbox"/> | <input type="checkbox"/> | <input type="checkbox"/>        |        |          | Del × |
|                                                                                                      |                                     |                          |                                 |        |          | Add + |
| Payment for development of<br>educational presentations<br>including service on speakers'<br>bureaus | <input checked="" type="checkbox"/> | <input type="checkbox"/> | <input type="checkbox"/>        |        |          | Del × |
|                                                                                                      |                                     |                          |                                 |        |          | Add + |
| Stock/stock options                                                                                  | <input checked="" type="checkbox"/> | <input type="checkbox"/> | <input type="checkbox"/>        |        |          | Del × |
|                                                                                                      |                                     |                          |                                 |        |          | Add + |
| Travel/accommodations<br>expenses covered or<br>reimbursed                                           | <input checked="" type="checkbox"/> | <input type="checkbox"/> | <input type="checkbox"/>        |        |          | Del × |
|                                                                                                      |                                     |                          |                                 |        |          | Add + |
| Other (err on the side of full<br>disclosure)                                                        | <input checked="" type="checkbox"/> | <input type="checkbox"/> | <input type="checkbox"/>        |        |          | Del × |
|                                                                                                      |                                     |                          |                                 |        |          | Add + |

**Section 4. Information about financial relationships involving your spouse or partner or your children (under 18 years of age).**

Do your children or your spouse or partner have financial relationships with entities that have an interest in the content of the submitted work?

- No other relationships/conditions/circumstances that present potential conflict of interest
- Yes, the following relationships/conditions/circumstances are present (explain below):

## **ICMJE Uniform Disclosure Form for Potential Conflicts of Interest**

### **Section 5. Information about relevant nonfinancial associations.**

Do you have any relevant nonfinancial associations or interests (personal, professional, political, institutional, religious, or other) that a reasonable reader would want to know about in relation to the submitted work?

- No relevant nonfinancial relationships/conditions/circumstances to report.
- Yes, the following relevant nonfinancial relationships/conditions/circumstances are present (explain below):

At the time of manuscript acceptance, journals will ask authors to confirm and, if necessary, update their disclosure statements. On occasion, journals may ask authors to disclose further information about reported relationships.

Save Form

## ICMJE Uniform Disclosure Form for Potential Conflicts of Interest

### INSTRUCTIONS:

The purpose of this form is to provide readers of your manuscript with information about your other interests that could influence how they receive and understand your work. The form has five parts.

#### 1. Identifying information.

Each author should submit a separate form. Provide complete information and double-check the manuscript number. If you are NOT the corresponding author please insert his or her name.

#### 2. The work under consideration for publication.

Please provide information about the work that you have submitted for publication. The time frame for this reporting is that of the work itself, from the initial conception and planning to the present. The idea is to provide for the reader information about resources that you received, either directly or indirectly (via your institution), to enable you to complete the work. If you check the "No" box it means that you did the work without receiving any financial support from any third party -- that is, the work was supported by funds from the same institution that pays your salary and that institution did not receive third-party funds to pay you. If you or your institution did receive funds from a third party to support the work, check "Yes" along with the appropriate boxes to indicate the type of support and whether you or your institution received it.

#### 3. Relevant financial activities outside the submitted work.

Please report all sources of revenue relevant to the submitted work that accrued either directly to you or were paid to your institution on your behalf over the 36 months prior to submission of the work. This should include all monies from sources with relevance to the submitted work, not just monies from the entity that sponsored the research. If there is any question, it is usually better to disclose a relationship than not to do so. Please note that your interactions with the work's sponsor outside the submitted work should be listed here. For each category list each entity on a separate line. Use as many lines as necessary to provide complete information. In addition, please disclose relationships that fall outside the 36-month window that readers may want to know about and could reasonably criticize you for not disclosing (for example, long-term financial relationships that are now ended).

The goal of this section is to provide information for our reviewers and readers about your interactions with entities in the biomedical arena that could be perceived to influence, or that give the appearance of potentially influencing, what you wrote in the submitted work. You should disclose interactions with ANY entity that could be considered broadly relevant to the work. For example, if your article is about testing an epidermal growth factor receptor (EGFR) antagonist in lung cancer, you should report all associations with entities pursuing diagnostic or therapeutic strategies in cancer in general, not just in the area of EGFR or lung cancer. For grants you have received for work outside the submitted work, you should disclose support ONLY from entities that could be perceived to benefit financially from the published work, such as drug companies, or foundations supported by entities that could be perceived to have a financial stake in the outcome. Public funding sources, such as the NIH or the MRC, need not be disclosed. For example, if the NIH sponsored a piece of work you have been involved in but drugs were provided by a pharmaceutical company, you need only list the pharmaceutical company.

#### 4. Financial relationships involving your spouse or partner or your children (under 18 years of age).

If monies from the types of relationships listed in Section 3 were paid to your spouse or partner or dependent children, please list the type of activity and source of the money.

#### 5. Nonfinancial associations.

Please report any personal, professional, political, institutional, religious, or other associations that a reasonable reader would want to know about in relation to the submitted work.



## ICMJE Uniform Disclosure Form for Potential Conflicts of Interest

### Section 1. Identifying Information.

Given Name:  Surname:  Effective Date:

(or first) (or last) Format example: 07-August-2008

Are you the corresponding author?  Yes  No

Corresponding author's name:

Manuscript Title:

Manuscript Identifying Number (if you know it):

### Section 2. Information about the support of the work under consideration for publication.

Did you or your institution at any time receive payment or support in kind for any aspect of the submitted work (including but not limited to grants, data monitoring board, study design, manuscript preparation, statistical analysis, etc...)?

No

Yes, specify nature of compensation

If you have more than one relationship, click "Add +" to add a row. Click "Del x" to delete an extra row.

| Type                         | Money Paid to You*                  |                                     | Money to Your Institution           |                                     | Name of Entity | Comments**                                                                                                                                                                                                                                                                                                                                                                                                                          |       |
|------------------------------|-------------------------------------|-------------------------------------|-------------------------------------|-------------------------------------|----------------|-------------------------------------------------------------------------------------------------------------------------------------------------------------------------------------------------------------------------------------------------------------------------------------------------------------------------------------------------------------------------------------------------------------------------------------|-------|
|                              | No                                  | Yes                                 | No                                  | Yes                                 |                |                                                                                                                                                                                                                                                                                                                                                                                                                                     |       |
| Grant                        | <input checked="" type="checkbox"/> | <input type="checkbox"/>            | <input type="checkbox"/>            | <input checked="" type="checkbox"/> | XDx, Inc.      | Principal investigator for IMAGE study paid to St. Luke's Foundation as research grant                                                                                                                                                                                                                                                                                                                                              | Del x |
|                              |                                     |                                     |                                     |                                     |                |                                                                                                                                                                                                                                                                                                                                                                                                                                     | Add + |
| Consulting fee or honorarium | <input type="checkbox"/>            | <input checked="" type="checkbox"/> | <input checked="" type="checkbox"/> | <input type="checkbox"/>            | XDx, Inc.      | Honoria for giving talks about AlloMap testing given to me personally. Honoria given to me personally for making video of my personal experience with AlloMap testing. Also started Clinical AlloMap User's Conference which is conceived by me as a way to share our experience with the clinical use of AlloMap testing with other transplant centers - money will be paid to the St. Luke's Foundation for compensation of time. | Del x |
|                              |                                     |                                     |                                     |                                     |                |                                                                                                                                                                                                                                                                                                                                                                                                                                     | Add + |



**ICMJE Uniform Disclosure Form for Potential Conflicts of Interest**

| Type                                                                                                                                 | Money Paid to You*                  |                                     | Money to Your Institution           |                          | Name of Entity | Comments**                                                                                                                                                                                                                                               |       |
|--------------------------------------------------------------------------------------------------------------------------------------|-------------------------------------|-------------------------------------|-------------------------------------|--------------------------|----------------|----------------------------------------------------------------------------------------------------------------------------------------------------------------------------------------------------------------------------------------------------------|-------|
|                                                                                                                                      | <input type="checkbox"/>            | <input type="checkbox"/>            | <input type="checkbox"/>            | <input type="checkbox"/> |                |                                                                                                                                                                                                                                                          |       |
| Support for travel to meetings for the study or otherwise                                                                            | <input type="checkbox"/>            | <input checked="" type="checkbox"/> | <input checked="" type="checkbox"/> | <input type="checkbox"/> | XDx, Inc.      | Travel related costs for Steering Committee meeting, 12/09, otherwise no financial reimbursement for the meeting. Other face-to-face Steering Committee meetings were at national or international society meetings and travel costs were not reimbursed | Del × |
|                                                                                                                                      |                                     |                                     |                                     |                          |                |                                                                                                                                                                                                                                                          | Add + |
| Fees for participation in review activities such as data monitoring boards, statistical analysis, end point committees, and the like | <input checked="" type="checkbox"/> | <input type="checkbox"/>            | <input checked="" type="checkbox"/> | <input type="checkbox"/> |                |                                                                                                                                                                                                                                                          | Del × |
|                                                                                                                                      |                                     |                                     |                                     |                          |                |                                                                                                                                                                                                                                                          | Add + |
| Payment for writing or reviewing the manuscript                                                                                      | <input checked="" type="checkbox"/> | <input type="checkbox"/>            | <input checked="" type="checkbox"/> | <input type="checkbox"/> |                |                                                                                                                                                                                                                                                          | Del × |
|                                                                                                                                      |                                     |                                     |                                     |                          |                |                                                                                                                                                                                                                                                          | Add + |
| Support in kind such as writing, provision of medicines or equipment, or administrative support                                      | <input checked="" type="checkbox"/> | <input type="checkbox"/>            | <input checked="" type="checkbox"/> | <input type="checkbox"/> |                |                                                                                                                                                                                                                                                          | Del × |
|                                                                                                                                      |                                     |                                     |                                     |                          |                |                                                                                                                                                                                                                                                          | Add + |
| Other                                                                                                                                | <input checked="" type="checkbox"/> | <input type="checkbox"/>            | <input checked="" type="checkbox"/> | <input type="checkbox"/> |                |                                                                                                                                                                                                                                                          | Del × |
|                                                                                                                                      |                                     |                                     |                                     |                          |                |                                                                                                                                                                                                                                                          | Add + |

\*\*Use this section to provide any needed explanation

**Section 3. Information about relevant financial relationships outside the submitted work.**

Place a check in the appropriate boxes in the table to indicate whether you have financial relationships (regardless of amount of compensation) with any entities that have an interest related to the submitted work. Use one line for each entity; add as many lines as you need. Use the comments column to indicate any additional information that you think a reader or editor would want to know about the compensation. Report relationships that were present during the 36 months prior to submission. In addition please disclose relationships that fall outside the 36-month window that readers may want to know about and could reasonably criticize you for not disclosing (for example, long-term financial relationships that are now ended).

If you have more than one relationship, click "Add +" to add a row. Click "Del ×" to delete an extra row.



**ICMJE Uniform Disclosure Form for Potential Conflicts of Interest**

| Type of Relationship<br>(in alphabetical order) | No                                  | Money<br>Paid to<br>You             | Money to<br>Your<br>institution     | Entity         | Comments                                                                                             |       |
|-------------------------------------------------|-------------------------------------|-------------------------------------|-------------------------------------|----------------|------------------------------------------------------------------------------------------------------|-------|
| Board membership                                | <input checked="" type="checkbox"/> | <input type="checkbox"/>            | <input type="checkbox"/>            |                |                                                                                                      | Del × |
|                                                 |                                     |                                     |                                     |                |                                                                                                      | Add + |
| Consultancy                                     | <input type="checkbox"/>            | <input checked="" type="checkbox"/> | <input type="checkbox"/>            | Medtronic      | Provided consultative services for potential new product.                                            | Del × |
|                                                 |                                     |                                     |                                     |                |                                                                                                      | Add + |
| Employment                                      | <input checked="" type="checkbox"/> | <input type="checkbox"/>            | <input type="checkbox"/>            |                |                                                                                                      | Del × |
|                                                 |                                     |                                     |                                     |                |                                                                                                      | Add + |
| Expert testimony                                | <input checked="" type="checkbox"/> | <input type="checkbox"/>            | <input type="checkbox"/>            |                |                                                                                                      | Del × |
|                                                 |                                     |                                     |                                     |                |                                                                                                      | Add + |
| Gifts                                           | <input checked="" type="checkbox"/> | <input type="checkbox"/>            | <input type="checkbox"/>            |                |                                                                                                      | Del × |
|                                                 |                                     |                                     |                                     |                |                                                                                                      | Add + |
| Grants/grants pending                           | <input type="checkbox"/>            | <input type="checkbox"/>            | <input checked="" type="checkbox"/> | Paracor, Inc.  | Principal investigator for PEERLESS-HF study. Funds paid to St. Luke's Foundation as research grant. | Del × |
| Grants/grants pending                           | <input type="checkbox"/>            | <input type="checkbox"/>            | <input checked="" type="checkbox"/> | Celladon, Inc. | Principal investigator for CUPID study. Funds paid to St. Luke's Foundation as research grant.       | Del × |
|                                                 |                                     |                                     |                                     |                |                                                                                                      | Add + |
| Honoraria                                       | <input type="checkbox"/>            | <input checked="" type="checkbox"/> | <input type="checkbox"/>            | Astra Zeneca   | Honoraria for giving talks on candesartan.                                                           | Del × |
| Honoraria                                       | <input type="checkbox"/>            | <input checked="" type="checkbox"/> | <input type="checkbox"/>            | LifeCor        | Honoraria for giving talks on LifeVest.                                                              | Del × |
| Honoraria                                       | <input type="checkbox"/>            | <input checked="" type="checkbox"/> | <input type="checkbox"/>            | CHF Solutions  | Honoraria for giving talks on ultrafiltration.                                                       | Del × |
|                                                 |                                     |                                     |                                     |                |                                                                                                      | Add + |
| Payment for manuscript preparation              | <input checked="" type="checkbox"/> | <input type="checkbox"/>            | <input type="checkbox"/>            |                |                                                                                                      | Del × |
|                                                 |                                     |                                     |                                     |                |                                                                                                      | Add + |
| Patents (planned, pending or issued)            | <input checked="" type="checkbox"/> | <input type="checkbox"/>            | <input type="checkbox"/>            |                |                                                                                                      | Del × |
|                                                 |                                     |                                     |                                     |                |                                                                                                      | Add + |
| Royalties                                       | <input checked="" type="checkbox"/> | <input type="checkbox"/>            | <input type="checkbox"/>            |                |                                                                                                      | Del × |
|                                                 |                                     |                                     |                                     |                |                                                                                                      | Add + |



**ICMJE Uniform Disclosure Form for Potential Conflicts of Interest**

| Type of Relationship (in alphabetical order)                                                | No                                  | Money Paid to You                   | Money to Your institution | Entity       | Comments                                                                                               |       |
|---------------------------------------------------------------------------------------------|-------------------------------------|-------------------------------------|---------------------------|--------------|--------------------------------------------------------------------------------------------------------|-------|
| Payment for development of educational presentations including service on speakers' bureaus | <input checked="" type="checkbox"/> | <input type="checkbox"/>            | <input type="checkbox"/>  |              |                                                                                                        | Del × |
|                                                                                             |                                     |                                     |                           |              |                                                                                                        | Add + |
| Stock/stock options                                                                         | <input checked="" type="checkbox"/> | <input type="checkbox"/>            | <input type="checkbox"/>  |              |                                                                                                        | Del × |
|                                                                                             |                                     |                                     |                           |              |                                                                                                        | Add + |
| Travel/accommodations expenses covered or reimbursed                                        | <input type="checkbox"/>            | <input checked="" type="checkbox"/> | <input type="checkbox"/>  | Thoratec Inc | Payment for hotel during Thoratec User's Conference meeting. All other expenses paid by me personally. | Del × |
|                                                                                             |                                     |                                     |                           |              |                                                                                                        | Add + |
| Other (err on the side of full disclosure)                                                  | <input checked="" type="checkbox"/> | <input type="checkbox"/>            | <input type="checkbox"/>  |              |                                                                                                        | Del × |
|                                                                                             |                                     |                                     |                           |              |                                                                                                        | Add + |

**Section 4. Information about financial relationships involving your spouse or partner or your children (under 18 years of age).**

Do your children or your spouse or partner have financial relationships with entities that have an interest in the content of the submitted work?

- No other relationships/conditions/circumstances that present potential conflict of interest
- Yes, the following relationships/conditions/circumstances are present (explain below):

**Section 5. Information about relevant nonfinancial associations.**

Do you have any relevant nonfinancial associations or interests (personal, professional, political, institutional, religious, or other) that a reasonable reader would want to know about in relation to the submitted work?

- No relevant nonfinancial relationships/conditions/circumstances to report.
- Yes, the following relevant nonfinancial relationships/conditions/circumstances are present (explain below):

At the time of manuscript acceptance, journals will ask authors to confirm and, if necessary, update their disclosure statements. On occasion, journals may ask authors to disclose further information about reported relationships.

Save Form

## ICMJE Uniform Disclosure Form for Potential Conflicts of Interest

### INSTRUCTIONS:

The purpose of this form is to provide readers of your manuscript with information about your other interests that could influence how they receive and understand your work. The form has five parts.

#### 1. Identifying information.

Each author should submit a separate form. Provide complete information and double-check the manuscript number. If you are NOT the corresponding author please insert his or her name.

#### 2. The work under consideration for publication.

Please provide information about the work that you have submitted for publication. The time frame for this reporting is that of the work itself, from the initial conception and planning to the present. The idea is to provide for the reader information about resources that you received, either directly or indirectly (via your institution), to enable you to complete the work. If you check the "No" box it means that you did the work without receiving any financial support from any third party -- that is, the work was supported by funds from the same institution that pays your salary and that institution did not receive third-party funds to pay you. If you or your institution did receive funds from a third party to support the work, check "Yes" along with the appropriate boxes to indicate the type of support and whether you or your institution received it.

#### 3. Relevant financial activities outside the submitted work.

Please report all sources of revenue relevant to the submitted work that accrued either directly to you or were paid to your institution on your behalf over the 36 months prior to submission of the work. This should include all monies from sources with relevance to the submitted work, not just monies from the entity that sponsored the research. If there is any question, it is usually better to disclose a relationship than not to do so. Please note that your interactions with the work's sponsor outside the submitted work should be listed here. For each category list each entity on a separate line. Use as many lines as necessary to provide complete information. In addition, please disclose relationships that fall outside the 36-month window that readers may want to know about and could reasonably criticize you for not disclosing (for example, long-term financial relationships that are now ended).

The goal of this section is to provide information for our reviewers and readers about your interactions with entities in the bio-medical arena that could be perceived to influence, or that give the appearance of potentially influencing, what you wrote in the submitted work. You should disclose interactions with ANY entity that could be considered broadly relevant to the work. For example, if your article is about testing an epidermal growth factor receptor (EGFR) antagonist in lung cancer, you should report all associations with entities pursuing diagnostic or therapeutic strategies in cancer in general, not just in the area of EGFR or lung cancer. For grants you have received for work outside the submitted work, you should disclose support ONLY from entities that could be perceived to benefit financially from the published work, such as drug companies, or foundations supported by entities that could be perceived to have a financial stake in the outcome. Public funding sources, such as the NIH or the MRC, need not be disclosed. For example, if the NIH sponsored a piece of work you have been involved in but drugs were provided by a pharmaceutical company, you need only list the pharmaceutical company.

#### 4. Financial relationships involving your spouse or partner or your children (under 18 years of age).

If monies from the types of relationships listed in Section 3 were paid to your spouse or partner or dependent children, please list the type of activity and source of the money.

#### 5. Nonfinancial associations.

Please report any personal, professional, political, institutional, religious, or other associations that a reasonable reader would want to know about in relation to the submitted work.



## ICMJE Uniform Disclosure Form for Potential Conflicts of Interest

### Section 1. Identifying Information.

Given Name:  Surname:  Effective Date:

Format example: 07-August-2008

Are you the corresponding author?  Yes  No

Corresponding author's name:

Manuscript Title:

Manuscript Identifying Number (if you know it):

### Section 2. Information about the support of the work under consideration for publication.

Did you or your institution at any time receive payment or support in kind for any aspect of the submitted work (including but not limited to grants, data monitoring board, study design, manuscript preparation, statistical analysis, etc...)?

No

Yes, specify nature of compensation

If you have more than one relationship, click "Add +" to add a row. Click "Del x" to delete an extra row.

| Type                                                      | Money Paid to You*                  |                                     | Money to Your Institution           |                                     | Name of Entity | Comments**                                                                                          |       |
|-----------------------------------------------------------|-------------------------------------|-------------------------------------|-------------------------------------|-------------------------------------|----------------|-----------------------------------------------------------------------------------------------------|-------|
|                                                           | No                                  | Yes                                 | No                                  | Yes                                 |                |                                                                                                     |       |
| Grant                                                     | <input checked="" type="checkbox"/> | <input type="checkbox"/>            | <input type="checkbox"/>            | <input checked="" type="checkbox"/> | XDx Inc.,      | Provided grant for the study                                                                        | Del x |
| Grant                                                     | <input checked="" type="checkbox"/> | <input type="checkbox"/>            | <input type="checkbox"/>            | <input checked="" type="checkbox"/> | Novartis       | Provided grant for a study                                                                          | Del x |
|                                                           |                                     |                                     |                                     |                                     |                |                                                                                                     | Add + |
| Consulting fee or honorarium                              | <input type="checkbox"/>            | <input checked="" type="checkbox"/> | <input checked="" type="checkbox"/> | <input type="checkbox"/>            | XDx Inc.,      | Payment for attending investigator's clinical executive meeting                                     | Del x |
|                                                           |                                     |                                     |                                     |                                     |                |                                                                                                     | Add + |
| Support for travel to meetings for the study or otherwise | <input type="checkbox"/>            | <input checked="" type="checkbox"/> | <input checked="" type="checkbox"/> | <input type="checkbox"/>            | XDx Inc.,      | Payment for travel and hotel to attend investigator's executive and manuscript preparation meetings | Del x |
| Support for travel to meetings for the study or otherwise | <input type="checkbox"/>            | <input checked="" type="checkbox"/> | <input checked="" type="checkbox"/> | <input type="checkbox"/>            | Novartis       | Payment for travel and hotel to attend investigator's meeting                                       | Del x |
|                                                           |                                     |                                     |                                     |                                     |                |                                                                                                     | Add + |



**ICMJE Uniform Disclosure Form for Potential Conflicts of Interest**

| Type                                                                                                                                 | Money Paid to You*                  |                          | Money to Your Institution           |                          | Name of Entity | Comments** |       |
|--------------------------------------------------------------------------------------------------------------------------------------|-------------------------------------|--------------------------|-------------------------------------|--------------------------|----------------|------------|-------|
| Fees for participation in review activities such as data monitoring boards, statistical analysis, end point committees, and the like | <input checked="" type="checkbox"/> | <input type="checkbox"/> | <input checked="" type="checkbox"/> | <input type="checkbox"/> |                |            | Del × |
|                                                                                                                                      |                                     |                          |                                     |                          |                |            | Add + |
| Payment for writing or reviewing the manuscript                                                                                      | <input checked="" type="checkbox"/> | <input type="checkbox"/> | <input checked="" type="checkbox"/> | <input type="checkbox"/> |                |            | Del × |
|                                                                                                                                      |                                     |                          |                                     |                          |                |            | Add + |
| Support in kind such as writing, provision of medicines or equipment, or administrative support                                      | <input checked="" type="checkbox"/> | <input type="checkbox"/> | <input checked="" type="checkbox"/> | <input type="checkbox"/> |                |            | Del × |
|                                                                                                                                      |                                     |                          |                                     |                          |                |            | Add + |
| Other                                                                                                                                | <input checked="" type="checkbox"/> | <input type="checkbox"/> | <input checked="" type="checkbox"/> | <input type="checkbox"/> |                |            | Del × |
|                                                                                                                                      |                                     |                          |                                     |                          |                |            | Add + |

\*\*Use this section to provide any needed explanation

**Section 3. Information about relevant financial relationships outside the submitted work.**

Place a check in the appropriate boxes in the table to indicate whether you have financial relationships (regardless of amount of compensation) with any entities that have an interest related to the submitted work. Use one line for each entity; add as many lines as you need. Use the comments column to indicate any additional information that you think a reader or editor would want to know about the compensation. Report relationships that were present during the 36 months prior to submission. In addition please disclose relationships that fall outside the 36-month window that readers may want to know about and could reasonably criticize you for not disclosing (for example, long-term financial relationships that are now ended).

If you have more than one relationship, click "Add +" to add a row. Click "Del ×" to delete an extra row.

| Type of Relationship (in alphabetical order) | No                                  | Money Paid to You        | Money to Your institution | Entity | Comments |       |
|----------------------------------------------|-------------------------------------|--------------------------|---------------------------|--------|----------|-------|
| Board membership                             | <input checked="" type="checkbox"/> | <input type="checkbox"/> | <input type="checkbox"/>  |        |          | Del × |
|                                              |                                     |                          |                           |        |          | Add + |
| Consultancy                                  | <input checked="" type="checkbox"/> | <input type="checkbox"/> | <input type="checkbox"/>  |        |          | Del × |
|                                              |                                     |                          |                           |        |          | Add + |
| Employment                                   | <input checked="" type="checkbox"/> | <input type="checkbox"/> | <input type="checkbox"/>  |        |          | Del × |



**ICMJE Uniform Disclosure Form for Potential Conflicts of Interest**

| Type of Relationship<br>(in alphabetical order)                                                      | No                                  | Money<br>Paid to<br>You  | Money to<br>Your<br>institution | Entity | Comments |       |
|------------------------------------------------------------------------------------------------------|-------------------------------------|--------------------------|---------------------------------|--------|----------|-------|
|                                                                                                      |                                     |                          |                                 |        |          | Add + |
| Expert testimony                                                                                     | <input checked="" type="checkbox"/> | <input type="checkbox"/> | <input type="checkbox"/>        |        |          | Del × |
|                                                                                                      |                                     |                          |                                 |        |          | Add + |
| Gifts                                                                                                | <input checked="" type="checkbox"/> | <input type="checkbox"/> | <input type="checkbox"/>        |        |          | Del × |
|                                                                                                      |                                     |                          |                                 |        |          | Add + |
| Grants/grants pending                                                                                | <input checked="" type="checkbox"/> | <input type="checkbox"/> | <input type="checkbox"/>        |        |          | Del × |
|                                                                                                      |                                     |                          |                                 |        |          | Add + |
| Honoraria                                                                                            | <input checked="" type="checkbox"/> | <input type="checkbox"/> | <input type="checkbox"/>        |        |          | Del × |
|                                                                                                      |                                     |                          |                                 |        |          | Add + |
| Payment for manuscript<br>preparation                                                                | <input checked="" type="checkbox"/> | <input type="checkbox"/> | <input type="checkbox"/>        |        |          | Del × |
|                                                                                                      |                                     |                          |                                 |        |          | Add + |
| Patents (planned, pending or<br>issued)                                                              | <input checked="" type="checkbox"/> | <input type="checkbox"/> | <input type="checkbox"/>        |        |          | Del × |
|                                                                                                      |                                     |                          |                                 |        |          | Add + |
| Royalties                                                                                            | <input checked="" type="checkbox"/> | <input type="checkbox"/> | <input type="checkbox"/>        |        |          | Del × |
|                                                                                                      |                                     |                          |                                 |        |          | Add + |
| Payment for development of<br>educational presentations<br>including service on speakers'<br>bureaus | <input checked="" type="checkbox"/> | <input type="checkbox"/> | <input type="checkbox"/>        |        |          | Del × |
|                                                                                                      |                                     |                          |                                 |        |          | Add + |
| Stock/stock options                                                                                  | <input checked="" type="checkbox"/> | <input type="checkbox"/> | <input type="checkbox"/>        |        |          | Del × |
|                                                                                                      |                                     |                          |                                 |        |          | Add + |
| Travel/accommodations<br>expenses covered or<br>reimbursed                                           | <input checked="" type="checkbox"/> | <input type="checkbox"/> | <input type="checkbox"/>        |        |          | Del × |
|                                                                                                      |                                     |                          |                                 |        |          | Add + |
| Other (err on the side of full<br>disclosure)                                                        | <input checked="" type="checkbox"/> | <input type="checkbox"/> | <input type="checkbox"/>        |        |          | Del × |
|                                                                                                      |                                     |                          |                                 |        |          | Add + |

## **ICMJE Uniform Disclosure Form for Potential Conflicts of Interest**

### **Section 4. Information about financial relationships involving your spouse or partner or your children (under 18 years of age).**

Do your children or your spouse or partner have financial relationships with entities that have an interest in the content of the submitted work?

- No other relationships/conditions/circumstances that present potential conflict of interest
- Yes, the following relationships/conditions/circumstances are present (explain below):

### **Section 5. Information about relevant nonfinancial associations.**

Do you have any relevant nonfinancial associations or interests (personal, professional, political, institutional, religious, or other) that a reasonable reader would want to know about in relation to the submitted work?

- No relevant nonfinancial relationships/conditions/circumstances to report.
- Yes, the following relevant nonfinancial relationships/conditions/circumstances are present (explain below):

At the time of manuscript acceptance, journals will ask authors to confirm and, if necessary, update their disclosure statements. On occasion, journals may ask authors to disclose further information about reported relationships.

Save Form

## **ICMJE Uniform Disclosure Form for Potential Conflicts of Interest**

### **INSTRUCTIONS:**

The purpose of this form is to provide readers of your manuscript with information about your other interests that could influence how they receive and understand your work. The form has five parts.

#### **1. Identifying information.**

Each author should submit a separate form. Provide complete information and double-check the manuscript number. If you are NOT the corresponding author please insert his or her name.

#### **2. The work under consideration for publication.**

Please provide information about the work that you have submitted for publication. The time frame for this reporting is that of the work itself, from the initial conception and planning to the present. The idea is to provide for the reader information about resources that you received, either directly or indirectly (via your institution), to enable you to complete the work. If you check the "No" box it means that you did the work without receiving any financial support from any third party -- that is, the work was supported by funds from the same institution that pays your salary and that institution did not receive third-party funds to pay you. If you or your institution did receive funds from a third party to support the work, check "Yes" along with the appropriate boxes to indicate the type of support and whether you or your institution received it.

#### **3. Relevant financial activities outside the submitted work.**

Please report all sources of revenue relevant to the submitted work that accrued either directly to you or were paid to your institution on your behalf over the 36 months prior to submission of the work. This should include all monies from sources with relevance to the submitted work, not just monies from the entity that sponsored the research. If there is any question, it is usually better to disclose a relationship than not to do so. Please note that your interactions with the work's sponsor outside the submitted work should be listed here. For each category list each entity on a separate line. Use as many lines as necessary to provide complete information. In addition, please disclose relationships that fall outside the 36-month window that readers may want to know about and could reasonably criticize you for not disclosing (for example, long-term financial relationships that are now ended).

The goal of this section is to provide information for our reviewers and readers about your interactions with entities in the biomedical arena that could be perceived to influence, or that give the appearance of potentially influencing, what you wrote in the submitted work. You should disclose interactions with ANY entity that could be considered broadly relevant to the work. For example, if your article is about testing an epidermal growth factor receptor (EGFR) antagonist in lung cancer, you should report all associations with entities pursuing diagnostic or therapeutic strategies in cancer in general, not just in the area of EGFR or lung cancer. For grants you have received for work outside the submitted work, you should disclose support ONLY from entities that could be perceived to benefit financially from the published work, such as drug companies, or foundations supported by entities that could be perceived to have a financial stake in the outcome. Public funding sources, such as the NIH or the MRC, need not be disclosed. For example, if the NIH sponsored a piece of work you have been involved in but drugs were provided by a pharmaceutical company, you need only list the pharmaceutical company.

#### **4. Financial relationships involving your spouse or partner or your children (under 18 years of age).**

If monies from the types of relationships listed in Section 3 were paid to your spouse or partner or dependent children, please list the type of activity and source of the money.

#### **5. Nonfinancial associations.**

Please report any personal, professional, political, institutional, religious, or other associations that a reasonable reader would want to know about in relation to the submitted work.



## ICMJE Uniform Disclosure Form for Potential Conflicts of Interest

### Section 1. Identifying Information.

Given Name:  Surname:  Effective Date:

(or first)

(or last)

Format example: 07-August-2008

Are you the corresponding author?  Yes  No

Corresponding author's name:

Manuscript Title:

Manuscript Identifying Number (if you know it):

### Section 2. Information about the support of the work under consideration for publication.

Did you or your institution at any time receive payment or support in kind for any aspect of the submitted work (including but not limited to grants, data monitoring board, study design, manuscript preparation, statistical analysis, etc...)?

No

Yes, specify nature of compensation

If you have more than one relationship, click "Add +" to add a row. Click "Del x" to delete an extra row.

| Type                                                                                                                                 | Money Paid to You*                  |                                     | Money to Your Institution           |                                     | Name of Entity | Comments**                                                                                                             |       |
|--------------------------------------------------------------------------------------------------------------------------------------|-------------------------------------|-------------------------------------|-------------------------------------|-------------------------------------|----------------|------------------------------------------------------------------------------------------------------------------------|-------|
|                                                                                                                                      | No                                  | Yes                                 | No                                  | Yes                                 |                |                                                                                                                        |       |
| Grant                                                                                                                                | <input checked="" type="checkbox"/> | <input type="checkbox"/>            | <input type="checkbox"/>            | <input checked="" type="checkbox"/> | XDx, Inc.      | Grant support for IMAGE study at Palo Alto VA Health Care System.                                                      | Del x |
|                                                                                                                                      |                                     |                                     |                                     |                                     |                |                                                                                                                        | Add + |
| Consulting fee or honorarium                                                                                                         | <input checked="" type="checkbox"/> | <input type="checkbox"/>            | <input checked="" type="checkbox"/> | <input type="checkbox"/>            |                |                                                                                                                        | Del x |
|                                                                                                                                      |                                     |                                     |                                     |                                     |                |                                                                                                                        | Add + |
| Support for travel to meetings for the study or otherwise                                                                            | <input type="checkbox"/>            | <input checked="" type="checkbox"/> | <input type="checkbox"/>            | <input checked="" type="checkbox"/> | XDx, Inc.      | Payment for travel and hotel to attend investigator's meetings and American Transplant Congress Meeting (Boston 2009). | Del x |
|                                                                                                                                      |                                     |                                     |                                     |                                     |                |                                                                                                                        | Add + |
| Fees for participation in review activities such as data monitoring boards, statistical analysis, end point committees, and the like | <input checked="" type="checkbox"/> | <input type="checkbox"/>            | <input checked="" type="checkbox"/> | <input type="checkbox"/>            |                |                                                                                                                        | Del x |
|                                                                                                                                      |                                     |                                     |                                     |                                     |                |                                                                                                                        | Add + |

## ICMJE Uniform Disclosure Form for Potential Conflicts of Interest

| Type                                                                                            | Money Paid to You*                  |                          | Money to Your Institution           |                          | Name of Entity | Comments**                                                                                                                        |       |
|-------------------------------------------------------------------------------------------------|-------------------------------------|--------------------------|-------------------------------------|--------------------------|----------------|-----------------------------------------------------------------------------------------------------------------------------------|-------|
| Payment for writing or reviewing the manuscript                                                 | <input checked="" type="checkbox"/> | <input type="checkbox"/> | <input checked="" type="checkbox"/> | <input type="checkbox"/> |                |                                                                                                                                   | Del × |
|                                                                                                 |                                     |                          |                                     |                          |                |                                                                                                                                   | Add + |
| Support in kind such as writing, provision of medicines or equipment, or administrative support | <input checked="" type="checkbox"/> | <input type="checkbox"/> | <input checked="" type="checkbox"/> | <input type="checkbox"/> | XDx, Inc       | Received administrative and biostatistical support to analyze the data through XDx but no financial support for these activities. | Del × |
|                                                                                                 |                                     |                          |                                     |                          |                |                                                                                                                                   | Add + |
| Other                                                                                           | <input checked="" type="checkbox"/> | <input type="checkbox"/> | <input checked="" type="checkbox"/> | <input type="checkbox"/> |                |                                                                                                                                   | Del × |
|                                                                                                 |                                     |                          |                                     |                          |                |                                                                                                                                   | Add + |

\*\*Use this section to provide any needed explanation

### Section 3. Information about relevant financial relationships outside the submitted work.

Place a check in the appropriate boxes in the table to indicate whether you have financial relationships (regardless of amount of compensation) with any entities that have an interest related to the submitted work. Use one line for each entity; add as many lines as you need. Use the comments column to indicate any additional information that you think a reader or editor would want to know about the compensation. Report relationships that were present during the 36 months prior to submission. In addition please disclose relationships that fall outside the 36-month window that readers may want to know about and could reasonably criticize you for not disclosing (for example, long-term financial relationships that are now ended).

If you have more than one relationship, click "Add +" to add a row. Click "Del ×" to delete an extra row.

| Type of Relationship (in alphabetical order) | No                                  | Money Paid to You        | Money to Your institution | Entity | Comments |       |
|----------------------------------------------|-------------------------------------|--------------------------|---------------------------|--------|----------|-------|
| Board membership                             | <input checked="" type="checkbox"/> | <input type="checkbox"/> | <input type="checkbox"/>  |        |          | Del × |
|                                              |                                     |                          |                           |        |          | Add + |
| Consultancy                                  | <input checked="" type="checkbox"/> | <input type="checkbox"/> | <input type="checkbox"/>  |        |          | Del × |
|                                              |                                     |                          |                           |        |          | Add + |
| Employment                                   | <input checked="" type="checkbox"/> | <input type="checkbox"/> | <input type="checkbox"/>  |        |          | Del × |
|                                              |                                     |                          |                           |        |          | Add + |
| Expert testimony                             | <input checked="" type="checkbox"/> | <input type="checkbox"/> | <input type="checkbox"/>  |        |          | Del × |
|                                              |                                     |                          |                           |        |          | Add + |
| Gifts                                        | <input checked="" type="checkbox"/> | <input type="checkbox"/> | <input type="checkbox"/>  |        |          | Del × |



**ICMJE Uniform Disclosure Form for Potential Conflicts of Interest**

| Type of Relationship<br>(in alphabetical order)                                             | No                                  | Money<br>Paid to<br>You             | Money to<br>Your<br>institution     | Entity                                                                                                           | Comments                                                                                                      |       |
|---------------------------------------------------------------------------------------------|-------------------------------------|-------------------------------------|-------------------------------------|------------------------------------------------------------------------------------------------------------------|---------------------------------------------------------------------------------------------------------------|-------|
|                                                                                             |                                     |                                     |                                     |                                                                                                                  |                                                                                                               | Add + |
| Grants/grants pending                                                                       | <input type="checkbox"/>            | <input type="checkbox"/>            | <input checked="" type="checkbox"/> | Johnson & Johnson                                                                                                | Payment for participation in ADHERE Registry (patients admitted to hospital with decompensated heart failure) | Del × |
|                                                                                             |                                     |                                     |                                     |                                                                                                                  |                                                                                                               | Add + |
| Honoraria                                                                                   | <input checked="" type="checkbox"/> | <input type="checkbox"/>            | <input type="checkbox"/>            |                                                                                                                  |                                                                                                               | Del × |
|                                                                                             |                                     |                                     |                                     |                                                                                                                  |                                                                                                               | Add + |
| Payment for manuscript preparation                                                          | <input checked="" type="checkbox"/> | <input type="checkbox"/>            | <input type="checkbox"/>            |                                                                                                                  |                                                                                                               | Del × |
|                                                                                             |                                     |                                     |                                     |                                                                                                                  |                                                                                                               | Add + |
| Patents (planned, pending or issued)                                                        | <input checked="" type="checkbox"/> | <input type="checkbox"/>            | <input type="checkbox"/>            |                                                                                                                  |                                                                                                               | Del × |
|                                                                                             |                                     |                                     |                                     |                                                                                                                  |                                                                                                               | Add + |
| Royalties                                                                                   | <input type="checkbox"/>            | <input checked="" type="checkbox"/> | <input type="checkbox"/>            | Up-To-Date                                                                                                       | Author royalty for chapter on Heart Transplant Immunosuppression                                              | Del × |
|                                                                                             |                                     |                                     |                                     |                                                                                                                  |                                                                                                               | Add + |
| Payment for development of educational presentations including service on speakers' bureaus | <input type="checkbox"/>            | <input type="checkbox"/>            | <input checked="" type="checkbox"/> | Medtronic, St. Jude Medical foundation, Boston Scientific, Novartis, Schering-Plough, Johnson & Johnson, Abiomed | Provided unrestricted educational grants to organize a CME symposium on heart failure and transplantation.    | Del × |
|                                                                                             |                                     |                                     |                                     |                                                                                                                  |                                                                                                               | Add + |
| Stock/stock options                                                                         | <input checked="" type="checkbox"/> | <input type="checkbox"/>            | <input type="checkbox"/>            |                                                                                                                  |                                                                                                               | Del × |
|                                                                                             |                                     |                                     |                                     |                                                                                                                  |                                                                                                               | Add + |
| Travel/accommodations expenses covered or reimbursed                                        | <input checked="" type="checkbox"/> | <input type="checkbox"/>            | <input type="checkbox"/>            |                                                                                                                  |                                                                                                               | Del × |
|                                                                                             |                                     |                                     |                                     |                                                                                                                  |                                                                                                               | Add + |
| Other (err on the side of full disclosure)                                                  | <input checked="" type="checkbox"/> | <input type="checkbox"/>            | <input type="checkbox"/>            |                                                                                                                  |                                                                                                               | Del × |
|                                                                                             |                                     |                                     |                                     |                                                                                                                  |                                                                                                               | Add + |

## **ICMJE Uniform Disclosure Form for Potential Conflicts of Interest**

### **Section 4. Information about financial relationships involving your spouse or partner or your children (under 18 years of age).**

Do your children or your spouse or partner have financial relationships with entities that have an interest in the content of the submitted work?

- No other relationships/conditions/circumstances that present potential conflict of interest
- Yes, the following relationships/conditions/circumstances are present (explain below):

### **Section 5. Information about relevant nonfinancial associations.**

Do you have any relevant nonfinancial associations or interests (personal, professional, political, institutional, religious, or other) that a reasonable reader would want to know about in relation to the submitted work?

- No relevant nonfinancial relationships/conditions/circumstances to report.
- Yes, the following relevant nonfinancial relationships/conditions/circumstances are present (explain below):

At the time of manuscript acceptance, journals will ask authors to confirm and, if necessary, update their disclosure statements. On occasion, journals may ask authors to disclose further information about reported relationships.

Save Form

## **ICMJE Uniform Disclosure Form for Potential Conflicts of Interest**

### **INSTRUCTIONS:**

The purpose of this form is to provide readers of your manuscript with information about your other interests that could influence how they receive and understand your work. The form has five parts.

#### **1. Identifying information.**

Each author should submit a separate form. Provide complete information and double-check the manuscript number. If you are NOT the corresponding author please insert his or her name.

#### **2. The work under consideration for publication.**

Please provide information about the work that you have submitted for publication. The time frame for this reporting is that of the work itself, from the initial conception and planning to the present. The idea is to provide for the reader information about resources that you received, either directly or indirectly (via your institution), to enable you to complete the work. If you check the "No" box it means that you did the work without receiving any financial support from any third party -- that is, the work was supported by funds from the same institution that pays your salary and that institution did not receive third-party funds to pay you. If you or your institution did receive funds from a third party to support the work, check "Yes" along with the appropriate boxes to indicate the type of support and whether you or your institution received it.

#### **3. Relevant financial activities outside the submitted work.**

Please report all sources of revenue relevant to the submitted work that accrued either directly to you or were paid to your institution on your behalf over the 36 months prior to submission of the work. This should include all monies from sources with relevance to the submitted work, not just monies from the entity that sponsored the research. If there is any question, it is usually better to disclose a relationship than not to do so. Please note that your interactions with the work's sponsor outside the submitted work should be listed here. For each category list each entity on a separate line. Use as many lines as necessary to provide complete information. In addition, please disclose relationships that fall outside the 36-month window that readers may want to know about and could reasonably criticize you for not disclosing (for example, long-term financial relationships that are now ended).

The goal of this section is to provide information for our reviewers and readers about your interactions with entities in the bio-medical arena that could be perceived to influence, or that give the appearance of potentially influencing, what you wrote in the submitted work. You should disclose interactions with ANY entity that could be considered broadly relevant to the work. For example, if your article is about testing an epidermal growth factor receptor (EGFR) antagonist in lung cancer, you should report all associations with entities pursuing diagnostic or therapeutic strategies in cancer in general, not just in the area of EGFR or lung cancer. For grants you have received for work outside the submitted work, you should disclose support ONLY from entities that could be perceived to benefit financially from the published work, such as drug companies, or foundations supported by entities that could be perceived to have a financial stake in the outcome. Public funding sources, such as the NIH or the MRC, need not be disclosed. For example, if the NIH sponsored a piece of work you have been involved in but drugs were provided by a pharmaceutical company, you need only list the pharmaceutical company.

#### **4. Financial relationships involving your spouse or partner or your children (under 18 years of age).**

If monies from the types of relationships listed in Section 3 were paid to your spouse or partner or dependent children, please list the type of activity and source of the money.

#### **5. Nonfinancial associations.**

Please report any personal, professional, political, institutional, religious, or other associations that a reasonable reader would want to know about in relation to the submitted work.



## ICMJE Uniform Disclosure Form for Potential Conflicts of Interest

### Section 1. Identifying Information.

Given Name:  Surname:  Effective Date:

Format example: 07-August-2008

Are you the corresponding author?  Yes  No

Corresponding author's name:

Manuscript Title:

Manuscript Identifying Number (if you know it):

### Section 2. Information about the support of the work under consideration for publication.

Did you or your institution at any time receive payment or support in kind for any aspect of the submitted work (including but not limited to grants, data monitoring board, study design, manuscript preparation, statistical analysis, etc...)?

No

Yes, specify nature of compensation

If you have more than one relationship, click "Add +" to add a row. Click "Del x" to delete an extra row.

| Type                                                                                                                                 | Money Paid to You*                  |                          | Money to Your Institution           |                                     | Name of Entity | Comments**                                                                  |       |
|--------------------------------------------------------------------------------------------------------------------------------------|-------------------------------------|--------------------------|-------------------------------------|-------------------------------------|----------------|-----------------------------------------------------------------------------|-------|
|                                                                                                                                      | No                                  | Yes                      | No                                  | Yes                                 |                |                                                                             |       |
| Grant                                                                                                                                | <input checked="" type="checkbox"/> | <input type="checkbox"/> | <input type="checkbox"/>            | <input checked="" type="checkbox"/> | XDx            | Monies paid to institution, Cleveland Clinic, to support research conducted | Del x |
|                                                                                                                                      |                                     |                          |                                     |                                     |                |                                                                             | Add + |
| Consulting fee or honorarium                                                                                                         | <input checked="" type="checkbox"/> | <input type="checkbox"/> | <input checked="" type="checkbox"/> | <input type="checkbox"/>            |                |                                                                             | Del x |
|                                                                                                                                      |                                     |                          |                                     |                                     |                |                                                                             | Add + |
| Support for travel to meetings for the study or otherwise                                                                            | <input checked="" type="checkbox"/> | <input type="checkbox"/> | <input checked="" type="checkbox"/> | <input type="checkbox"/>            |                |                                                                             | Del x |
|                                                                                                                                      |                                     |                          |                                     |                                     |                |                                                                             | Add + |
| Fees for participation in review activities such as data monitoring boards, statistical analysis, end point committees, and the like | <input checked="" type="checkbox"/> | <input type="checkbox"/> | <input checked="" type="checkbox"/> | <input type="checkbox"/>            |                |                                                                             | Del x |
|                                                                                                                                      |                                     |                          |                                     |                                     |                |                                                                             | Add + |



**ICMJE Uniform Disclosure Form for Potential Conflicts of Interest**

| Type                                                                                            | Money Paid to You*                  |                          | Money to Your Institution           |                          | Name of Entity | Comments** |       |
|-------------------------------------------------------------------------------------------------|-------------------------------------|--------------------------|-------------------------------------|--------------------------|----------------|------------|-------|
|                                                                                                 | <input checked="" type="checkbox"/> | <input type="checkbox"/> | <input checked="" type="checkbox"/> | <input type="checkbox"/> |                |            |       |
| Payment for writing or reviewing the manuscript                                                 | <input checked="" type="checkbox"/> | <input type="checkbox"/> | <input checked="" type="checkbox"/> | <input type="checkbox"/> |                |            | Del × |
|                                                                                                 |                                     |                          |                                     |                          |                |            | Add + |
| Support in kind such as writing, provision of medicines or equipment, or administrative support | <input checked="" type="checkbox"/> | <input type="checkbox"/> | <input checked="" type="checkbox"/> | <input type="checkbox"/> |                |            | Del × |
|                                                                                                 |                                     |                          |                                     |                          |                |            | Add + |
| Other                                                                                           | <input checked="" type="checkbox"/> | <input type="checkbox"/> | <input checked="" type="checkbox"/> | <input type="checkbox"/> |                |            | Del × |
|                                                                                                 |                                     |                          |                                     |                          |                |            | Add + |

\*\*Use this section to provide any needed explanation

**Section 3. Information about relevant financial relationships outside the submitted work.**

Place a check in the appropriate boxes in the table to indicate whether you have financial relationships (regardless of amount of compensation) with any entities that have an interest related to the submitted work. Use one line for each entity; add as many lines as you need. Use the comments column to indicate any additional information that you think a reader or editor would want to know about the compensation. Report relationships that were present during the 36 months prior to submission. In addition please disclose relationships that fall outside the 36-month window that readers may want to know about and could reasonably criticize you for not disclosing (for example, long-term financial relationships that are now ended).

If you have more than one relationship, click "Add +" to add a row. Click "Del ×" to delete an extra row.

| Type of Relationship (in alphabetical order) | No                                  | Money Paid to You        | Money to Your institution           | Entity   | Comments                           |       |       |
|----------------------------------------------|-------------------------------------|--------------------------|-------------------------------------|----------|------------------------------------|-------|-------|
| Board membership                             | <input checked="" type="checkbox"/> | <input type="checkbox"/> | <input type="checkbox"/>            |          |                                    | Del × |       |
|                                              |                                     |                          |                                     |          |                                    |       | Add + |
| Consultancy                                  | <input type="checkbox"/>            | <input type="checkbox"/> | <input checked="" type="checkbox"/> | Novartis | Steering Committee, Novartis trial | Del × |       |
|                                              |                                     |                          |                                     |          |                                    |       | Add + |
| Employment                                   | <input checked="" type="checkbox"/> | <input type="checkbox"/> | <input type="checkbox"/>            |          |                                    | Del × |       |
|                                              |                                     |                          |                                     |          |                                    |       | Add + |
| Expert testimony                             | <input checked="" type="checkbox"/> | <input type="checkbox"/> | <input type="checkbox"/>            |          |                                    | Del × |       |
|                                              |                                     |                          |                                     |          |                                    |       | Add + |
| Gifts                                        | <input checked="" type="checkbox"/> | <input type="checkbox"/> | <input type="checkbox"/>            |          |                                    | Del × |       |



**ICMJE Uniform Disclosure Form for Potential Conflicts of Interest**

| Type of Relationship<br>(in alphabetical order)                                                      | No                                  | Money<br>Paid to<br>You             | Money to<br>Your<br>institution | Entity           | Comments                                                  |       |
|------------------------------------------------------------------------------------------------------|-------------------------------------|-------------------------------------|---------------------------------|------------------|-----------------------------------------------------------|-------|
|                                                                                                      |                                     |                                     |                                 |                  |                                                           | Add + |
| Grants/grants pending                                                                                | <input checked="" type="checkbox"/> | <input type="checkbox"/>            | <input type="checkbox"/>        |                  |                                                           | Del × |
|                                                                                                      |                                     |                                     |                                 |                  |                                                           | Add + |
| Honoraria                                                                                            | <input checked="" type="checkbox"/> | <input type="checkbox"/>            | <input type="checkbox"/>        |                  |                                                           | Del × |
|                                                                                                      |                                     |                                     |                                 |                  |                                                           | Add + |
| Payment for manuscript<br>preparation                                                                | <input checked="" type="checkbox"/> | <input type="checkbox"/>            | <input type="checkbox"/>        |                  |                                                           | Del × |
|                                                                                                      |                                     |                                     |                                 |                  |                                                           | Add + |
| Patents (planned, pending or<br>issued)                                                              | <input checked="" type="checkbox"/> | <input type="checkbox"/>            | <input type="checkbox"/>        |                  |                                                           | Del × |
|                                                                                                      |                                     |                                     |                                 |                  |                                                           | Add + |
| Royalties                                                                                            | <input checked="" type="checkbox"/> | <input type="checkbox"/>            | <input type="checkbox"/>        |                  |                                                           | Del × |
|                                                                                                      |                                     |                                     |                                 |                  |                                                           | Add + |
| Payment for development of<br>educational presentations<br>including service on speakers'<br>bureaus | <input checked="" type="checkbox"/> | <input type="checkbox"/>            | <input type="checkbox"/>        |                  |                                                           | Del × |
|                                                                                                      |                                     |                                     |                                 |                  |                                                           | Add + |
| Stock/stock options                                                                                  | <input type="checkbox"/>            | <input checked="" type="checkbox"/> | <input type="checkbox"/>        | Cardiomems, Inc. | Stock options                                             | Del × |
|                                                                                                      |                                     |                                     |                                 |                  |                                                           | Add + |
| Travel/accommodations<br>expenses covered or<br>reimbursed                                           | <input type="checkbox"/>            | <input checked="" type="checkbox"/> | <input type="checkbox"/>        | XDx              | Travel to XDx steering<br>committee meeting<br>reimbursed | Del × |
|                                                                                                      |                                     |                                     |                                 |                  |                                                           | Add + |
| Other (err on the side of full<br>disclosure)                                                        | <input checked="" type="checkbox"/> | <input type="checkbox"/>            | <input type="checkbox"/>        |                  |                                                           | Del × |
|                                                                                                      |                                     |                                     |                                 |                  |                                                           | Add + |

**Section 4. Information about financial relationships involving your spouse or partner or your children (under 18 years of age).**

Do your children or your spouse or partner have financial relationships with entities that have an interest in the content of the submitted work?

- No other relationships/conditions/circumstances that present potential conflict of interest
- Yes, the following relationships/conditions/circumstances are present (explain below):

## **ICMJE Uniform Disclosure Form for Potential Conflicts of Interest**

### **Section 5. Information about relevant nonfinancial associations.**

Do you have any relevant nonfinancial associations or interests (personal, professional, political, institutional, religious, or other) that a reasonable reader would want to know about in relation to the submitted work?

- No relevant nonfinancial relationships/conditions/circumstances to report.
- Yes, the following relevant nonfinancial relationships/conditions/circumstances are present (explain below):

At the time of manuscript acceptance, journals will ask authors to confirm and, if necessary, update their disclosure statements. On occasion, journals may ask authors to disclose further information about reported relationships.

Save Form

## ICMJE Uniform Disclosure Form for Potential Conflicts of Interest

### INSTRUCTIONS:

The purpose of this form is to provide readers of your manuscript with information about your other interests that could influence how they receive and understand your work. The form has five parts.

#### 1. Identifying information.

Each author should submit a separate form. Provide complete information and double-check the manuscript number. If you are NOT the corresponding author please insert his or her name.

#### 2. The work under consideration for publication.

Please provide information about the work that you have submitted for publication. The time frame for this reporting is that of the work itself, from the initial conception and planning to the present. The idea is to provide for the reader information about resources that you received, either directly or indirectly (via your institution), to enable you to complete the work. If you check the "No" box it means that you did the work without receiving any financial support from any third party -- that is, the work was supported by funds from the same institution that pays your salary and that institution did not receive third-party funds to pay you. If you or your institution did receive funds from a third party to support the work, check "Yes" along with the appropriate boxes to indicate the type of support and whether you or your institution received it.

#### 3. Relevant financial activities outside the submitted work.

Please report all sources of revenue relevant to the submitted work that accrued either directly to you or were paid to your institution on your behalf over the 36 months prior to submission of the work. This should include all monies from sources with relevance to the submitted work, not just monies from the entity that sponsored the research. If there is any question, it is usually better to disclose a relationship than not to do so. Please note that your interactions with the work's sponsor outside the submitted work should be listed here. For each category list each entity on a separate line. Use as many lines as necessary to provide complete information. In addition, please disclose relationships that fall outside the 36-month window that readers may want to know about and could reasonably criticize you for not disclosing (for example, long-term financial relationships that are now ended).

The goal of this section is to provide information for our reviewers and readers about your interactions with entities in the biomedical arena that could be perceived to influence, or that give the appearance of potentially influencing, what you wrote in the submitted work. You should disclose interactions with ANY entity that could be considered broadly relevant to the work. For example, if your article is about testing an epidermal growth factor receptor (EGFR) antagonist in lung cancer, you should report all associations with entities pursuing diagnostic or therapeutic strategies in cancer in general, not just in the area of EGFR or lung cancer. For grants you have received for work outside the submitted work, you should disclose support ONLY from entities that could be perceived to benefit financially from the published work, such as drug companies, or foundations supported by entities that could be perceived to have a financial stake in the outcome. Public funding sources, such as the NIH or the MRC, need not be disclosed. For example, if the NIH sponsored a piece of work you have been involved in but drugs were provided by a pharmaceutical company, you need only list the pharmaceutical company.

#### 4. Financial relationships involving your spouse or partner or your children (under 18 years of age).

If monies from the types of relationships listed in Section 3 were paid to your spouse or partner or dependent children, please list the type of activity and source of the money.

#### 5. Nonfinancial associations.

Please report any personal, professional, political, institutional, religious, or other associations that a reasonable reader would want to know about in relation to the submitted work.



## ICMJE Uniform Disclosure Form for Potential Conflicts of Interest

### Section 1. Identifying Information.

Given Name:  Surname:  Effective Date:

Format example: 07-August-2008

Are you the corresponding author?  Yes  No

Corresponding author's name:

Manuscript Title:

Manuscript Identifying Number (if you know it):

### Section 2. Information about the support of the work under consideration for publication.

Did you or your institution at any time receive payment or support in kind for any aspect of the submitted work (including but not limited to grants, data monitoring board, study design, manuscript preparation, statistical analysis, etc...)?

No

Yes, specify nature of compensation

If you have more than one relationship, click "Add +" to add a row. Click "Del x" to delete an extra row.

| Type                                                                                                                                 | Money Paid to You*                  |                          | Money to Your Institution           |                                     | Name of Entity | Comments**        |       |
|--------------------------------------------------------------------------------------------------------------------------------------|-------------------------------------|--------------------------|-------------------------------------|-------------------------------------|----------------|-------------------|-------|
|                                                                                                                                      | No                                  | Yes                      | No                                  | Yes                                 |                |                   |       |
| Grant                                                                                                                                | <input checked="" type="checkbox"/> | <input type="checkbox"/> | <input type="checkbox"/>            | <input checked="" type="checkbox"/> | XDx            | IMAGE study grant | Del x |
|                                                                                                                                      |                                     |                          |                                     |                                     |                |                   | Add + |
| Consulting fee or honorarium                                                                                                         | <input checked="" type="checkbox"/> | <input type="checkbox"/> | <input checked="" type="checkbox"/> | <input type="checkbox"/>            |                |                   | Del x |
|                                                                                                                                      |                                     |                          |                                     |                                     |                |                   | Add + |
| Support for travel to meetings for the study or otherwise                                                                            | <input checked="" type="checkbox"/> | <input type="checkbox"/> | <input checked="" type="checkbox"/> | <input type="checkbox"/>            |                |                   | Del x |
|                                                                                                                                      |                                     |                          |                                     |                                     |                |                   | Add + |
| Fees for participation in review activities such as data monitoring boards, statistical analysis, end point committees, and the like | <input checked="" type="checkbox"/> | <input type="checkbox"/> | <input checked="" type="checkbox"/> | <input type="checkbox"/>            |                |                   | Del x |
|                                                                                                                                      |                                     |                          |                                     |                                     |                |                   | Add + |
| Payment for writing or reviewing the manuscript                                                                                      | <input checked="" type="checkbox"/> | <input type="checkbox"/> | <input checked="" type="checkbox"/> | <input type="checkbox"/>            |                |                   | Del x |



**ICMJE Uniform Disclosure Form for Potential Conflicts of Interest**

| Type                                                                                            | Money Paid to You*                  |                          | Money to Your Institution           |                          | Name of Entity | Comments** |       |
|-------------------------------------------------------------------------------------------------|-------------------------------------|--------------------------|-------------------------------------|--------------------------|----------------|------------|-------|
|                                                                                                 |                                     |                          |                                     |                          |                |            | Add + |
| Support in kind such as writing, provision of medicines or equipment, or administrative support | <input checked="" type="checkbox"/> | <input type="checkbox"/> | <input checked="" type="checkbox"/> | <input type="checkbox"/> |                |            | Del × |
|                                                                                                 |                                     |                          |                                     |                          |                |            | Add + |
| Other                                                                                           | <input checked="" type="checkbox"/> | <input type="checkbox"/> | <input checked="" type="checkbox"/> | <input type="checkbox"/> |                |            | Del × |
|                                                                                                 |                                     |                          |                                     |                          |                |            | Add + |

\*\*Use this section to provide any needed explanation

**Section 3. Information about relevant financial relationships outside the submitted work.**

Place a check in the appropriate boxes in the table to indicate whether you have financial relationships (regardless of amount of compensation) with any entities that have an interest related to the submitted work. Use one line for each entity; add as many lines as you need. Use the comments column to indicate any additional information that you think a reader or editor would want to know about the compensation. Report relationships that were present during the 36 months prior to submission. In addition please disclose relationships that fall outside the 36-month window that readers may want to know about and could reasonably criticize you for not disclosing (for example, long-term financial relationships that are now ended).

If you have more than one relationship, click "Add +" to add a row. Click "Del ×" to delete an extra row.

| Type of Relationship (in alphabetical order) | No                                  | Money Paid to You                   | Money to Your institution | Entity   | Comments        |       |
|----------------------------------------------|-------------------------------------|-------------------------------------|---------------------------|----------|-----------------|-------|
| Board membership                             | <input checked="" type="checkbox"/> | <input type="checkbox"/>            | <input type="checkbox"/>  |          |                 | Del × |
|                                              |                                     |                                     |                           |          |                 | Add + |
| Consultancy                                  | <input type="checkbox"/>            | <input checked="" type="checkbox"/> | <input type="checkbox"/>  | Thoratec | Consulting fees | Del × |
|                                              |                                     |                                     |                           |          |                 | Add + |
| Employment                                   | <input checked="" type="checkbox"/> | <input type="checkbox"/>            | <input type="checkbox"/>  |          |                 | Del × |
|                                              |                                     |                                     |                           |          |                 | Add + |
| Expert testimony                             | <input checked="" type="checkbox"/> | <input type="checkbox"/>            | <input type="checkbox"/>  |          |                 | Del × |
|                                              |                                     |                                     |                           |          |                 | Add + |
| Gifts                                        | <input checked="" type="checkbox"/> | <input type="checkbox"/>            | <input type="checkbox"/>  |          |                 | Del × |
|                                              |                                     |                                     |                           |          |                 | Add + |
| Grants/grants pending                        | <input checked="" type="checkbox"/> | <input type="checkbox"/>            | <input type="checkbox"/>  |          |                 | Del × |



**ICMJE Uniform Disclosure Form for Potential Conflicts of Interest**

| Type of Relationship<br>(in alphabetical order)                                                      | No                                  | Money<br>Paid to<br>You             | Money to<br>Your<br>institution | Entity              | Comments                               |       |
|------------------------------------------------------------------------------------------------------|-------------------------------------|-------------------------------------|---------------------------------|---------------------|----------------------------------------|-------|
|                                                                                                      |                                     |                                     |                                 |                     |                                        | Add + |
| Honoraria                                                                                            | <input checked="" type="checkbox"/> | <input type="checkbox"/>            | <input type="checkbox"/>        |                     |                                        | Del × |
|                                                                                                      |                                     |                                     |                                 |                     |                                        | Add + |
| Payment for manuscript<br>preparation                                                                | <input checked="" type="checkbox"/> | <input type="checkbox"/>            | <input type="checkbox"/>        |                     |                                        | Del × |
|                                                                                                      |                                     |                                     |                                 |                     |                                        | Add + |
| Patents (planned, pending or<br>issued)                                                              | <input checked="" type="checkbox"/> | <input type="checkbox"/>            | <input type="checkbox"/>        |                     |                                        | Del × |
|                                                                                                      |                                     |                                     |                                 |                     |                                        | Add + |
| Royalties                                                                                            | <input checked="" type="checkbox"/> | <input type="checkbox"/>            | <input type="checkbox"/>        |                     |                                        | Del × |
|                                                                                                      |                                     |                                     |                                 |                     |                                        | Add + |
| Payment for development of<br>educational presentations<br>including service on speakers'<br>bureaus | <input type="checkbox"/>            | <input checked="" type="checkbox"/> | <input type="checkbox"/>        | XDx                 | Speaking and medical<br>advisory board | Del × |
| Payment for development of<br>educational presentations<br>including service on speakers'<br>bureaus | <input type="checkbox"/>            | <input checked="" type="checkbox"/> | <input type="checkbox"/>        | United Therapeutics | Medical advisory board                 | Del × |
|                                                                                                      |                                     |                                     |                                 |                     |                                        | Add + |
| Stock/stock options                                                                                  | <input checked="" type="checkbox"/> | <input type="checkbox"/>            | <input type="checkbox"/>        |                     |                                        | Del × |
|                                                                                                      |                                     |                                     |                                 |                     |                                        | Add + |
| Travel/accommodations<br>expenses covered or<br>reimbursed                                           | <input checked="" type="checkbox"/> | <input type="checkbox"/>            | <input type="checkbox"/>        |                     |                                        | Del × |
|                                                                                                      |                                     |                                     |                                 |                     |                                        | Add + |
| Other (err on the side of full<br>disclosure)                                                        | <input checked="" type="checkbox"/> | <input type="checkbox"/>            | <input type="checkbox"/>        |                     |                                        | Del × |
|                                                                                                      |                                     |                                     |                                 |                     |                                        | Add + |

**Section 4. Information about financial relationships involving your spouse or partner or your children (under 18 years of age).**

Do your children or your spouse or partner have financial relationships with entities that have an interest in the content of the submitted work?

- No other relationships/conditions/circumstances that present potential conflict of interest
- Yes, the following relationships/conditions/circumstances are present (explain below):

## **ICMJE Uniform Disclosure Form for Potential Conflicts of Interest**

### **Section 5. Information about relevant nonfinancial associations.**

Do you have any relevant nonfinancial associations or interests (personal, professional, political, institutional, religious, or other) that a reasonable reader would want to know about in relation to the submitted work?

- No relevant nonfinancial relationships/conditions/circumstances to report.
- Yes, the following relevant nonfinancial relationships/conditions/circumstances are present (explain below):

At the time of manuscript acceptance, journals will ask authors to confirm and, if necessary, update their disclosure statements. On occasion, journals may ask authors to disclose further information about reported relationships.

Save Form

## **ICMJE Uniform Disclosure Form for Potential Conflicts of Interest**

### **INSTRUCTIONS:**

The purpose of this form is to provide readers of your manuscript with information about your other interests that could influence how they receive and understand your work. The form has five parts.

#### **1. Identifying information.**

Each author should submit a separate form. Provide complete information and double-check the manuscript number. If you are NOT the corresponding author please insert his or her name.

#### **2. The work under consideration for publication.**

Please provide information about the work that you have submitted for publication. The time frame for this reporting is that of the work itself, from the initial conception and planning to the present. The idea is to provide for the reader information about resources that you received, either directly or indirectly (via your institution), to enable you to complete the work. If you check the "No" box it means that you did the work without receiving any financial support from any third party -- that is, the work was supported by funds from the same institution that pays your salary and that institution did not receive third-party funds to pay you. If you or your institution did receive funds from a third party to support the work, check "Yes" along with the appropriate boxes to indicate the type of support and whether you or your institution received it.

#### **3. Relevant financial activities outside the submitted work.**

Please report all sources of revenue relevant to the submitted work that accrued either directly to you or were paid to your institution on your behalf over the 36 months prior to submission of the work. This should include all monies from sources with relevance to the submitted work, not just monies from the entity that sponsored the research. If there is any question, it is usually better to disclose a relationship than not to do so. Please note that your interactions with the work's sponsor outside the submitted work should be listed here. For each category list each entity on a separate line. Use as many lines as necessary to provide complete information. In addition, please disclose relationships that fall outside the 36-month window that readers may want to know about and could reasonably criticize you for not disclosing (for example, long-term financial relationships that are now ended).

The goal of this section is to provide information for our reviewers and readers about your interactions with entities in the biomedical arena that could be perceived to influence, or that give the appearance of potentially influencing, what you wrote in the submitted work. You should disclose interactions with ANY entity that could be considered broadly relevant to the work. For example, if your article is about testing an epidermal growth factor receptor (EGFR) antagonist in lung cancer, you should report all associations with entities pursuing diagnostic or therapeutic strategies in cancer in general, not just in the area of EGFR or lung cancer. For grants you have received for work outside the submitted work, you should disclose support ONLY from entities that could be perceived to benefit financially from the published work, such as drug companies, or foundations supported by entities that could be perceived to have a financial stake in the outcome. Public funding sources, such as the NIH or the MRC, need not be disclosed. For example, if the NIH sponsored a piece of work you have been involved in but drugs were provided by a pharmaceutical company, you need only list the pharmaceutical company.

#### **4. Financial relationships involving your spouse or partner or your children (under 18 years of age).**

If monies from the types of relationships listed in Section 3 were paid to your spouse or partner or dependent children, please list the type of activity and source of the money.

#### **5. Nonfinancial associations.**

Please report any personal, professional, political, institutional, religious, or other associations that a reasonable reader would want to know about in relation to the submitted work.



## ICMJE Uniform Disclosure Form for Potential Conflicts of Interest

### Section 1. Identifying Information.

Given Name:  Surname:  Effective Date:

Format example: 07-August-2008

Are you the corresponding author?  Yes  No

Manuscript Title:

Manuscript Identifying Number (if you know it):

### Section 2. Information about the support of the work under consideration for publication.

Did you or your institution at any time receive payment or support in kind for any aspect of the submitted work (including but not limited to grants, data monitoring board, study design, manuscript preparation, statistical analysis, etc...)?

No

Yes, specify nature of compensation

If you have more than one relationship, click "Add +" to add a row. Click "Del x" to delete an extra row.

| Type                         | Money Paid to You*                  |                                     | Money to Your Institution           |                                     | Name of Entity | Comments**                                                                                                                                                                                                                                                                                                                                                                                                                                                                                                                                                                             |       |
|------------------------------|-------------------------------------|-------------------------------------|-------------------------------------|-------------------------------------|----------------|----------------------------------------------------------------------------------------------------------------------------------------------------------------------------------------------------------------------------------------------------------------------------------------------------------------------------------------------------------------------------------------------------------------------------------------------------------------------------------------------------------------------------------------------------------------------------------------|-------|
|                              | No                                  | Yes                                 | No                                  | Yes                                 |                |                                                                                                                                                                                                                                                                                                                                                                                                                                                                                                                                                                                        |       |
| Grant                        | <input checked="" type="checkbox"/> | <input type="checkbox"/>            | <input type="checkbox"/>            | <input checked="" type="checkbox"/> | XDx, Inc.      | Stanford was one of the sites chosen to enroll patients but was also the site that initiated the study and wrote the 1st draft of the protocol (ie investigator initiated). Stanford was originally contracted to be the coordinating center but that was changed and subsequently discontinued. Thereafter, Stanford was paid on a per patient basis – enrolled. This contract took into account my effort as site PI and leadership role as steering committee chair. I did not receive any individual payment outside that which was part of the contract between XDx and Stanford. | Del x |
|                              |                                     |                                     |                                     |                                     |                |                                                                                                                                                                                                                                                                                                                                                                                                                                                                                                                                                                                        | Add + |
| Consulting fee or honorarium | <input type="checkbox"/>            | <input checked="" type="checkbox"/> | <input checked="" type="checkbox"/> | <input type="checkbox"/>            | XDx            | Speaker, 2008                                                                                                                                                                                                                                                                                                                                                                                                                                                                                                                                                                          | Del x |
|                              |                                     |                                     |                                     |                                     |                |                                                                                                                                                                                                                                                                                                                                                                                                                                                                                                                                                                                        | Add + |



**ICMJE Uniform Disclosure Form for Potential Conflicts of Interest**

| Type                                                                                                                                 | Money Paid to You*                  |                                     | Money to Your Institution           |                          | Name of Entity | Comments**                       |       |
|--------------------------------------------------------------------------------------------------------------------------------------|-------------------------------------|-------------------------------------|-------------------------------------|--------------------------|----------------|----------------------------------|-------|
|                                                                                                                                      | <input type="checkbox"/>            | <input type="checkbox"/>            | <input type="checkbox"/>            | <input type="checkbox"/> |                |                                  |       |
| Support for travel to meetings for the study or otherwise                                                                            | <input checked="" type="checkbox"/> | <input type="checkbox"/>            | <input checked="" type="checkbox"/> | <input type="checkbox"/> |                |                                  | Del × |
|                                                                                                                                      |                                     |                                     |                                     |                          |                |                                  | Add + |
| Fees for participation in review activities such as data monitoring boards, statistical analysis, end point committees, and the like | <input type="checkbox"/>            | <input checked="" type="checkbox"/> | <input checked="" type="checkbox"/> | <input type="checkbox"/> | XDx            | Advisory board participant, 2007 | Del × |
|                                                                                                                                      |                                     |                                     |                                     |                          |                |                                  | Add + |
| Payment for writing or reviewing the manuscript                                                                                      | <input checked="" type="checkbox"/> | <input type="checkbox"/>            | <input checked="" type="checkbox"/> | <input type="checkbox"/> |                |                                  | Del × |
|                                                                                                                                      |                                     |                                     |                                     |                          |                |                                  | Add + |
| Support in kind such as writing, provision of medicines or equipment, or administrative support                                      | <input checked="" type="checkbox"/> | <input type="checkbox"/>            | <input checked="" type="checkbox"/> | <input type="checkbox"/> | XDx            | Grant, see above                 | Del × |
|                                                                                                                                      |                                     |                                     |                                     |                          |                |                                  | Add + |
| Other                                                                                                                                | <input checked="" type="checkbox"/> | <input type="checkbox"/>            | <input checked="" type="checkbox"/> | <input type="checkbox"/> |                |                                  | Del × |
|                                                                                                                                      |                                     |                                     |                                     |                          |                |                                  | Add + |

\*\*Use this section to provide any needed explanation

**Section 3. Information about relevant financial relationships outside the submitted work.**

Place a check in the appropriate boxes in the table to indicate whether you have financial relationships (regardless of amount of compensation) with any entities that have an interest related to the submitted work. Use one line for each entity; add as many lines as you need. Use the comments column to indicate any additional information that you think a reader or editor would want to know about the compensation. Report relationships that were present during the 36 months prior to submission. In addition please disclose relationships that fall outside the 36-month window that readers may want to know about and could reasonably criticize you for not disclosing (for example, long-term financial relationships that are now ended).

If you have more than one relationship, click "Add +" to add a row. Click "Del ×" to delete an extra row.

| Type of Relationship (in alphabetical order) | No                                  | Money Paid to You        | Money to Your institution | Entity | Comments |       |
|----------------------------------------------|-------------------------------------|--------------------------|---------------------------|--------|----------|-------|
| Board membership                             | <input checked="" type="checkbox"/> | <input type="checkbox"/> | <input type="checkbox"/>  |        |          | Del × |
|                                              |                                     |                          |                           |        |          | Add + |



**ICMJE Uniform Disclosure Form for Potential Conflicts of Interest**

| Type of Relationship<br>(in alphabetical order)                                             | No                                  | Money<br>Paid to<br>You             | Money to<br>Your<br>institution     | Entity             | Comments                                                                                                                         |       |
|---------------------------------------------------------------------------------------------|-------------------------------------|-------------------------------------|-------------------------------------|--------------------|----------------------------------------------------------------------------------------------------------------------------------|-------|
| Consultancy                                                                                 | <input checked="" type="checkbox"/> | <input type="checkbox"/>            | <input type="checkbox"/>            |                    |                                                                                                                                  | Del × |
|                                                                                             |                                     |                                     |                                     |                    |                                                                                                                                  | Add + |
| Employment                                                                                  | <input checked="" type="checkbox"/> | <input type="checkbox"/>            | <input type="checkbox"/>            |                    |                                                                                                                                  | Del × |
|                                                                                             |                                     |                                     |                                     |                    |                                                                                                                                  | Add + |
| Expert testimony                                                                            | <input checked="" type="checkbox"/> | <input type="checkbox"/>            | <input type="checkbox"/>            |                    |                                                                                                                                  | Del × |
|                                                                                             |                                     |                                     |                                     |                    |                                                                                                                                  | Add + |
| Gifts                                                                                       | <input checked="" type="checkbox"/> | <input type="checkbox"/>            | <input type="checkbox"/>            |                    |                                                                                                                                  | Del × |
|                                                                                             |                                     |                                     |                                     |                    |                                                                                                                                  | Add + |
| Grants/grants pending                                                                       | <input type="checkbox"/>            | <input type="checkbox"/>            | <input checked="" type="checkbox"/> | Novartis Inc US    | Multicenter trial of Everolimus in heart transplant patients. I am the Stanford site PI                                          | Del × |
|                                                                                             |                                     |                                     |                                     |                    |                                                                                                                                  | Add + |
| Honoraria                                                                                   | <input checked="" type="checkbox"/> | <input type="checkbox"/>            | <input type="checkbox"/>            |                    |                                                                                                                                  | Del × |
|                                                                                             |                                     |                                     |                                     |                    |                                                                                                                                  | Add + |
| Payment for manuscript preparation                                                          | <input type="checkbox"/>            | <input checked="" type="checkbox"/> | <input type="checkbox"/>            | Novartis Inc Spain | Chaired a consensus meeting from which a manuscript was published.                                                               | Del × |
|                                                                                             |                                     |                                     |                                     |                    |                                                                                                                                  | Add + |
| Patents (planned, pending or issued)                                                        | <input checked="" type="checkbox"/> | <input type="checkbox"/>            | <input type="checkbox"/>            |                    |                                                                                                                                  | Del × |
|                                                                                             |                                     |                                     |                                     |                    |                                                                                                                                  | Add + |
| Royalties                                                                                   | <input checked="" type="checkbox"/> | <input type="checkbox"/>            | <input type="checkbox"/>            |                    |                                                                                                                                  | Del × |
|                                                                                             |                                     |                                     |                                     |                    |                                                                                                                                  | Add + |
| Payment for development of educational presentations including service on speakers' bureaus | <input checked="" type="checkbox"/> | <input type="checkbox"/>            | <input type="checkbox"/>            |                    |                                                                                                                                  | Del × |
|                                                                                             |                                     |                                     |                                     |                    |                                                                                                                                  | Add + |
| Stock/stock options                                                                         | <input checked="" type="checkbox"/> | <input type="checkbox"/>            | <input type="checkbox"/>            |                    |                                                                                                                                  | Del × |
|                                                                                             |                                     |                                     |                                     |                    |                                                                                                                                  | Add + |
| Travel/accommodations expenses covered or reimbursed                                        | <input type="checkbox"/>            | <input checked="" type="checkbox"/> | <input type="checkbox"/>            | Novartis Inc Spain | * Travel to chair concensus meeting in Spain, 2008.<br>* Travel to chair meeting of Spanish Transplant Cardiologists, 2009 Paris | Del × |

## ICMJE Uniform Disclosure Form for Potential Conflicts of Interest

| Type of Relationship<br>(in alphabetical order) | No                                  | Money<br>Paid to<br>You  | Money to<br>Your<br>institution | Entity | Comments |       |
|-------------------------------------------------|-------------------------------------|--------------------------|---------------------------------|--------|----------|-------|
|                                                 |                                     |                          |                                 |        |          | Add + |
| Other (err on the side of full disclosure)      | <input checked="" type="checkbox"/> | <input type="checkbox"/> | <input type="checkbox"/>        |        |          | Del × |
|                                                 |                                     |                          |                                 |        |          | Add + |

### Section 4. Information about financial relationships involving your spouse or partner or your children (under 18 years of age).

Do your children or your spouse or partner have financial relationships with entities that have an interest in the content of the submitted work?

- No other relationships/conditions/circumstances that present potential conflict of interest  
 Yes, the following relationships/conditions/circumstances are present (explain below):

### Section 5. Information about relevant nonfinancial associations.

Do you have any relevant nonfinancial associations or interests (personal, professional, political, institutional, religious, or other) that a reasonable reader would want to know about in relation to the submitted work?

- No relevant nonfinancial relationships/conditions/circumstances to report.  
 Yes, the following relevant nonfinancial relationships/conditions/circumstances are present (explain below):

At the time of manuscript acceptance, journals will ask authors to confirm and, if necessary, update their disclosure statements. On occasion, journals may ask authors to disclose further information about reported relationships.

Save Form

## ICMJE Uniform Disclosure Form for Potential Conflicts of Interest

### INSTRUCTIONS:

The purpose of this form is to provide readers of your manuscript with information about your other interests that could influence how they receive and understand your work. The form has five parts.

#### 1. Identifying information.

Each author should submit a separate form. Provide complete information and double-check the manuscript number. If you are NOT the corresponding author please insert his or her name.

#### 2. The work under consideration for publication.

Please provide information about the work that you have submitted for publication. The time frame for this reporting is that of the work itself, from the initial conception and planning to the present. The idea is to provide for the reader information about resources that you received, either directly or indirectly (via your institution), to enable you to complete the work. If you check the "No" box it means that you did the work without receiving any financial support from any third party -- that is, the work was supported by funds from the same institution that pays your salary and that institution did not receive third-party funds to pay you. If you or your institution did receive funds from a third party to support the work, check "Yes" along with the appropriate boxes to indicate the type of support and whether you or your institution received it.

#### 3. Relevant financial activities outside the submitted work.

Please report all sources of revenue relevant to the submitted work that accrued either directly to you or were paid to your institution on your behalf over the 36 months prior to submission of the work. This should include all monies from sources with relevance to the submitted work, not just monies from the entity that sponsored the research. If there is any question, it is usually better to disclose a relationship than not to do so. Please note that your interactions with the work's sponsor outside the submitted work should be listed here. For each category list each entity on a separate line. Use as many lines as necessary to provide complete information. In addition, please disclose relationships that fall outside the 36-month window that readers may want to know about and could reasonably criticize you for not disclosing (for example, long-term financial relationships that are now ended).

The goal of this section is to provide information for our reviewers and readers about your interactions with entities in the biomedical arena that could be perceived to influence, or that give the appearance of potentially influencing, what you wrote in the submitted work. You should disclose interactions with ANY entity that could be considered broadly relevant to the work. For example, if your article is about testing an epidermal growth factor receptor (EGFR) antagonist in lung cancer, you should report all associations with entities pursuing diagnostic or therapeutic strategies in cancer in general, not just in the area of EGFR or lung cancer. For grants you have received for work outside the submitted work, you should disclose support ONLY from entities that could be perceived to benefit financially from the published work, such as drug companies, or foundations supported by entities that could be perceived to have a financial stake in the outcome. Public funding sources, such as the NIH or the MRC, need not be disclosed. For example, if the NIH sponsored a piece of work you have been involved in but drugs were provided by a pharmaceutical company, you need only list the pharmaceutical company.

#### 4. Financial relationships involving your spouse or partner or your children (under 18 years of age).

If monies from the types of relationships listed in Section 3 were paid to your spouse or partner or dependent children, please list the type of activity and source of the money.

#### 5. Nonfinancial associations.

Please report any personal, professional, political, institutional, religious, or other associations that a reasonable reader would want to know about in relation to the submitted work.



## ICMJE Uniform Disclosure Form for Potential Conflicts of Interest

### Section 1. Identifying Information.

Given Name:  Surname:  Effective Date:   
(or first) (or last) Format example: 07-August-2008

Are you the corresponding author?  Yes  No

Corresponding author's name:

Manuscript Title:

Manuscript Identifying Number (if you know it):

### Section 2. Information about the support of the work under consideration for publication.

Did you or your institution at any time receive payment or support in kind for any aspect of the submitted work (including but not limited to grants, data monitoring board, study design, manuscript preparation, statistical analysis, etc...)?

No

Yes, specify nature of compensation

If you have more than one relationship, click "Add +" to add a row. Click "Del x" to delete an extra row.

| Type                                                                                                                                 | Money Paid to You*                  |                          | Money to Your Institution           |                          | Name of Entity | Comments** |       |
|--------------------------------------------------------------------------------------------------------------------------------------|-------------------------------------|--------------------------|-------------------------------------|--------------------------|----------------|------------|-------|
|                                                                                                                                      | No                                  | Yes                      | No                                  | Yes                      |                |            |       |
| Grant                                                                                                                                | <input checked="" type="checkbox"/> | <input type="checkbox"/> | <input checked="" type="checkbox"/> | <input type="checkbox"/> |                |            | Del x |
|                                                                                                                                      |                                     |                          |                                     |                          |                |            | Add + |
| Consulting fee or honorarium                                                                                                         | <input checked="" type="checkbox"/> | <input type="checkbox"/> | <input checked="" type="checkbox"/> | <input type="checkbox"/> |                |            | Del x |
|                                                                                                                                      |                                     |                          |                                     |                          |                |            | Add + |
| Support for travel to meetings for the study or otherwise                                                                            | <input checked="" type="checkbox"/> | <input type="checkbox"/> | <input checked="" type="checkbox"/> | <input type="checkbox"/> |                |            | Del x |
|                                                                                                                                      |                                     |                          |                                     |                          |                |            | Add + |
| Fees for participation in review activities such as data monitoring boards, statistical analysis, end point committees, and the like | <input checked="" type="checkbox"/> | <input type="checkbox"/> | <input checked="" type="checkbox"/> | <input type="checkbox"/> |                |            | Del x |
|                                                                                                                                      |                                     |                          |                                     |                          |                |            | Add + |
| Payment for writing or reviewing the manuscript                                                                                      | <input checked="" type="checkbox"/> | <input type="checkbox"/> | <input checked="" type="checkbox"/> | <input type="checkbox"/> |                |            | Del x |



**ICMJE Uniform Disclosure Form for Potential Conflicts of Interest**

| Type                                                                                            | Money Paid to You*                  |                                     | Money to Your Institution           |                                     | Name of Entity                            | Comments**                                                                                                      |       |
|-------------------------------------------------------------------------------------------------|-------------------------------------|-------------------------------------|-------------------------------------|-------------------------------------|-------------------------------------------|-----------------------------------------------------------------------------------------------------------------|-------|
|                                                                                                 |                                     |                                     |                                     |                                     |                                           |                                                                                                                 | Add + |
| Support in kind such as writing, provision of medicines or equipment, or administrative support | <input checked="" type="checkbox"/> | <input type="checkbox"/>            | <input checked="" type="checkbox"/> | <input type="checkbox"/>            |                                           |                                                                                                                 | Del × |
|                                                                                                 |                                     |                                     |                                     |                                     |                                           |                                                                                                                 | Add + |
| Other                                                                                           | <input type="checkbox"/>            | <input checked="" type="checkbox"/> | <input type="checkbox"/>            | <input checked="" type="checkbox"/> | XDx, Inc. the corporate sponsor of study. | The AlloMap test in the study is a product of XDx, Inc. I am employed as the Chief Medical Officer at XDx, Inc. | Del × |
|                                                                                                 |                                     |                                     |                                     |                                     |                                           |                                                                                                                 | Add + |

\*\*Use this section to provide any needed explanation

**Section 3. Information about relevant financial relationships outside the submitted work.**

Place a check in the appropriate boxes in the table to indicate whether you have financial relationships (regardless of amount of compensation) with any entities that have an interest related to the submitted work. Use one line for each entity; add as many lines as you need. Use the comments column to indicate any additional information that you think a reader or editor would want to know about the compensation. Report relationships that were present during the 36 months prior to submission. In addition please disclose relationships that fall outside the 36-month window that readers may want to know about and could reasonably criticize you for not disclosing (for example, long-term financial relationships that are now ended).

If you have more than one relationship, click "Add +" to add a row. Click "Del ×" to delete an extra row.

| Type of Relationship (in alphabetical order) | No                                  | Money Paid to You                   | Money to Your institution | Entity    | Comments                                    |       |
|----------------------------------------------|-------------------------------------|-------------------------------------|---------------------------|-----------|---------------------------------------------|-------|
| Board membership                             | <input checked="" type="checkbox"/> | <input type="checkbox"/>            | <input type="checkbox"/>  |           |                                             | Del × |
|                                              |                                     |                                     |                           |           |                                             | Add + |
| Consultancy                                  | <input checked="" type="checkbox"/> | <input type="checkbox"/>            | <input type="checkbox"/>  |           |                                             | Del × |
|                                              |                                     |                                     |                           |           |                                             | Add + |
| Employment                                   | <input type="checkbox"/>            | <input checked="" type="checkbox"/> | <input type="checkbox"/>  | XDx, Inc. | I am the Chief Medical Officer at XDx, Inc. | Del × |
|                                              |                                     |                                     |                           |           |                                             | Add + |
| Expert testimony                             | <input checked="" type="checkbox"/> | <input type="checkbox"/>            | <input type="checkbox"/>  |           |                                             | Del × |
|                                              |                                     |                                     |                           |           |                                             | Add + |



**ICMJE Uniform Disclosure Form for Potential Conflicts of Interest**

| Type of Relationship<br>(in alphabetical order)                                                      | No                                  | Money<br>Paid to<br>You             | Money to<br>Your<br>institution | Entity                       | Comments                                               |       |
|------------------------------------------------------------------------------------------------------|-------------------------------------|-------------------------------------|---------------------------------|------------------------------|--------------------------------------------------------|-------|
| Gifts                                                                                                | <input checked="" type="checkbox"/> | <input type="checkbox"/>            | <input type="checkbox"/>        |                              |                                                        | Del × |
|                                                                                                      |                                     |                                     |                                 |                              |                                                        | Add + |
| Grants/grants pending                                                                                | <input checked="" type="checkbox"/> | <input type="checkbox"/>            | <input type="checkbox"/>        |                              |                                                        | Del × |
|                                                                                                      |                                     |                                     |                                 |                              |                                                        | Add + |
| Honoraria                                                                                            | <input checked="" type="checkbox"/> | <input type="checkbox"/>            | <input type="checkbox"/>        |                              |                                                        | Del × |
|                                                                                                      |                                     |                                     |                                 |                              |                                                        | Add + |
| Payment for manuscript<br>preparation                                                                | <input checked="" type="checkbox"/> | <input type="checkbox"/>            | <input type="checkbox"/>        |                              |                                                        | Del × |
|                                                                                                      |                                     |                                     |                                 |                              |                                                        | Add + |
| Patents (planned, pending or<br>issued)                                                              | <input checked="" type="checkbox"/> | <input type="checkbox"/>            | <input type="checkbox"/>        |                              |                                                        | Del × |
|                                                                                                      |                                     |                                     |                                 |                              |                                                        | Add + |
| Royalties                                                                                            | <input checked="" type="checkbox"/> | <input type="checkbox"/>            | <input type="checkbox"/>        |                              |                                                        | Del × |
|                                                                                                      |                                     |                                     |                                 |                              |                                                        | Add + |
| Payment for development of<br>educational presentations<br>including service on speakers'<br>bureaus | <input checked="" type="checkbox"/> | <input type="checkbox"/>            | <input type="checkbox"/>        |                              |                                                        | Del × |
|                                                                                                      |                                     |                                     |                                 |                              |                                                        | Add + |
| Stock/stock options                                                                                  | <input type="checkbox"/>            | <input checked="" type="checkbox"/> | <input type="checkbox"/>        | stock options from XDx, Inc. | I receive incentive stock<br>options from XDx, Inc.    | Del × |
|                                                                                                      |                                     |                                     |                                 |                              |                                                        | Add + |
| Travel/accommodations<br>expenses covered or<br>reimbursed                                           | <input type="checkbox"/>            | <input checked="" type="checkbox"/> | <input type="checkbox"/>        | XDx                          | Business travel expenses<br>reimbursed by XDx          | Del × |
|                                                                                                      |                                     |                                     |                                 |                              |                                                        | Add + |
| Other (err on the side of full<br>disclosure)                                                        | <input type="checkbox"/>            | <input checked="" type="checkbox"/> | <input type="checkbox"/>        | XDx,Inc.                     | I am employed as Chief<br>Medical Officer at XDx, Inc. | Del × |
|                                                                                                      |                                     |                                     |                                 |                              |                                                        | Add + |

## **ICMJE Uniform Disclosure Form for Potential Conflicts of Interest**

### **Section 4. Information about financial relationships involving your spouse or partner or your children (under 18 years of age).**

Do your children or your spouse or partner have financial relationships with entities that have an interest in the content of the submitted work?

- No other relationships/conditions/circumstances that present potential conflict of interest
- Yes, the following relationships/conditions/circumstances are present (explain below):

### **Section 5. Information about relevant nonfinancial associations.**

Do you have any relevant nonfinancial associations or interests (personal, professional, political, institutional, religious, or other) that a reasonable reader would want to know about in relation to the submitted work?

- No relevant nonfinancial relationships/conditions/circumstances to report.
- Yes, the following relevant nonfinancial relationships/conditions/circumstances are present (explain below):

At the time of manuscript acceptance, journals will ask authors to confirm and, if necessary, update their disclosure statements. On occasion, journals may ask authors to disclose further information about reported relationships.

Save Form
